# Supplementary material for: Brain Region-Specific Gene Signatures Revealed by Distinct Astrocyte Subpopulations Unveil Links to Glioma and Neurodegenerative Diseases
Source: eNeuro. 2019 Apr 2;6(2):ENEURO.0288-18.2019. doi: 10.1523/ENEURO.0288-18.2019 (PMC6449165; doi:10.1523/ENEURO.0288-18.2019)
Supplement: Figure 2-4 — Enrichment scores obtained from the gene set enrichment analysis using regional astrocyte subpopulation gene signatures. Scores represent FDR transformed into -log10 scale. The file also contains additional gene sets obtained from published studies related to neurodegenerative diseases. Gene sets were added to the MsigDB collection and used for gene set enrichment analysis. Download Figure 2-4, XLSX file. [file sup_enu-eN-NWR-0288-18-s04.xlsx]

## Sheet: ReadME
A gene-set enrichment analysis was performed using the astrocyte regional gene signatures. A hypergeometric test was used to
evaluate the significance of each gene set. The MsigDB complete gene set collection was downloaded and used.
Neurodegenerative disease related gene sets were obtained from literature and added to the MsigDB gene set collection.
Gene sets were significant with FDR < 0.05 and at least 5 genes in the gene set.
The files includes the -log10 transformed FDR values obtained from the enrichment of each gene set.
The complete list of gene sets and their enrichment scores are included

## Sheet: neurodegenerative gene sets
Disease Gene Set	Genes In Sets	Description	Title	Journal (PMID)
HOKAMA_ALZHEIMERS_UP/DN	38/181	17 autopsy samples from hippocampus (7 AD); Microarrays; FC > 1.5, FDR < 0.05	Altered Expression of Diabetes-Related Genes in Alzheimer's Disease Brains: The Hisayama Study	Cerebral Cortex; 2014; PMID:23595620
LABADORF_HUNTINGTONS_UP/DN	1857/1258	20 HD and 49 neuropathologically normal controls; RNA-seq; FC > 1.5, FDR < 0.05	RNA Sequence Analysis of Human Huntington's Disease Brain Reveals an Extensive Increase in Inflammatory and Developmental Gene Expression	Plos One; 2015; PMID: 26636579
DUMITRIU_PARKINSONS_UP/DN	227/135	29 PD, 44 controls; RNA-seq; FC > 1.5, FDR < 0.05	Integrative Analysis of Proteomics and RNA Transcriptomics implicate mitochondrial processed, protein folding pathways and GWAS loci in Parkinson disease	BMC Medical Genomics; 2016; PMID:26793951
ALZHEIMERS_MUTATIONS	27	Genes with mutations from GWAS	Alzheimer disease: Epidemiology, diagnostic criteria, risk factors and biomarkers	Biochemical Pharmacology; 2014; PMID:24398425
List of gene sets related to neurodegenerative diseases (AD, HD, PD). Gene sets were obtained from literature cited above.

## Sheet: gene-set enrichment.mat
Gene Sets	Brainstem					Cortex					Olfactory bulb
	PopA	PopB	PopC	PopD	PopE	PopA	PopB	PopC	PopD	PopE	PopA	PopB	PopC	PopD	PopE
GGGCGGR_V$SP1_Q6	0	0	0.409843	0	0	0	3.59711	0	0	0	0	0	0	0	0
GO_IMMUNE_SYSTEM_PROCESS	0	0	0	0	0	0	10.6012	0	0	0	0	8.69451	0	0	0
CAGGTG_V$E12_Q6	0	0	0	0	0	0	0.203864	0	0	0	0	0	0	0	0
CHEN_METABOLIC_SYNDROM_NETWORK	0	0	0	0	0	0	18.8669	0	0	0	0	17.1111	0	0	0
BLALOCK_ALZHEIMERS_DISEASE_UP	0	0	0	0	0	0	6.84188	0	0	0	0	0	0	0	0
GO_CELLULAR_RESPONSE_TO_ORGANIC_SUBSTANCE	0	0	0	0	0	0	3.80117	0	0	0	0	5.217	0	0	0
GO_POSITIVE_REGULATION_OF_RESPONSE_TO_STIMULUS	0	0	0	0	0	0	3.25845	0	0	0	0	5.03387	0	0	0
GO_ENDOPLASMIC_RETICULUM	0	0	5.3189	0	0	0	7.57698	0	0	0	0	6.33467	0.380107	0	0
GGGAGGRR_V$MAZ_Q6	0	0	0	0	0	0	0	0	0	0	0	0	0	0	0
LABADORF_HUNTINGTONS_UP	0	0	0	0	0	0	9.35747	0	0	0	0	13.189	0.586157	0	0
GO_RESPONSE_TO_EXTERNAL_STIMULUS	0	0	0	0	0	0	2.82887	0	0	0	0	6.36731	0	0	0
GO_REGULATION_OF_INTRACELLULAR_SIGNAL_TRANSDUCTION	0	0.451889	0	0	0	0	3.14344	0	0	0	0	3.13971	0	0	0
PILON_KLF1_TARGETS_DN	0	0	0	0	0	0	0.120824	0	0	0	0	0	0	0	0
GO_CELLULAR_RESPONSE_TO_STRESS	0	0	0	0	0	0	3.4912	0	0	0	0	0	0	0	0
GO_POSITIVE_REGULATION_OF_MOLECULAR_FUNCTION	0	0	0	0	0	0	0.277916	0	0	0	0	1.07522	0	0	0
GO_INTRACELLULAR_SIGNAL_TRANSDUCTION	0	0	0	0	0	0	1.95485	0	0	0	0	0	0	0	0
GO_PHOSPHATE_CONTAINING_COMPOUND_METABOLIC_PROCESS	0	0	0	0	0	0	0	0.383801	0	0	0	0	0	0	0
GO_POSITIVE_REGULATION_OF_BIOSYNTHETIC_PROCESS	0	0	0	0	0	0	0	0	0	0	0	0	0	0	0
GO_ENDOPLASMIC_RETICULUM_PART	0	0	4.45851	0	0	0	8.94413	0	0	0	0	3.28591	0	0	0
GO_ORGANONITROGEN_COMPOUND_METABOLIC_PROCESS	0	0	1.0885	0	0	0	0	6.70819	0	0	0	0	0.695665	0	0
GO_REGULATION_OF_PROTEIN_MODIFICATION_PROCESS	0	1.01833	0	0	0	0	0.0439663	0	0	0	0	2.8192	0	0	0
GO_POSITIVE_REGULATION_OF_GENE_EXPRESSION	0	0	0	0	0	0	0	0	0	0	0	0	0	0	0
GO_RIBONUCLEOTIDE_BINDING	0	0	0	0	0	0	0	0	0	0	0	0	0	0	0
MILI_PSEUDOPODIA_HAPTOTAXIS_DN	0	0	3.8729	0	0	0	20.6846	0	0	0	0	7.35423	0	0	0
GO_REGULATION_OF_IMMUNE_SYSTEM_PROCESS	0	0	0	0	0	0	4.23372	0	0	0	0	5.02087	0	0	0
GO_TISSUE_DEVELOPMENT	0	0	0	0	0	0	1.18095	0	0	0	0	0	0	0	0
GO_REGULATION_OF_PHOSPHORUS_METABOLIC_PROCESS	0	0	0	0	0	0	0.652552	0	0	0	0	1.90423	0	0	0
GO_POSITIVE_REGULATION_OF_CELL_COMMUNICATION	0	0	0	0	0	0	1.02402	0	0	0	0	1.58069	0	0	0
GO_REGULATION_OF_TRANSCRIPTION_FROM_RNA_POLYMERASE_II_PROMOTER	0	0	0	0	0	0	0	0	0	0	0	0	0	0	0
GO_SMALL_MOLECULE_METABOLIC_PROCESS	0	0	2.43708	0	0	0	0	8.00251	0	0	0	1.25484	7.66831	0	0
GO_CATABOLIC_PROCESS	0	0	0.148361	0	0	0	0	0	0	0	0	0	0	0	0
GO_POSITIVE_REGULATION_OF_CATALYTIC_ACTIVITY	0	0	0	0	0	0	0.801368	0	0	0	0	1.02156	0	0	0
GO_REGULATION_OF_MULTICELLULAR_ORGANISMAL_DEVELOPMENT	0	0	0	0	0	0	0	0.634533	0	0	0	0.500526	0	0	0
CAGCTG_V$AP4_Q5	0	0	0	0	0	0	0.932998	0	0	0	0	0	0	0	0
GO_INTRINSIC_COMPONENT_OF_PLASMA_MEMBRANE	0	0	0	0	0	0	0.0379793	0	0	0	0	1.02643	0	0	0
GO_SINGLE_ORGANISM_BIOSYNTHETIC_PROCESS	0	0	0	0	0	0	2.19845	4.34407	0	0	0	0	2.54505	0	0
GO_NEGATIVE_REGULATION_OF_RESPONSE_TO_STIMULUS	0	0	0	0	0	0	1.7385	0	0	0	0	0.842488	0	0	0
GO_RESPONSE_TO_OXYGEN_CONTAINING_COMPOUND	0	0	0	0	0	0	1.61201	0	0	0	0	4.23997	0	0	0
GO_REGULATION_OF_RESPONSE_TO_STRESS	0	0	0	0	0	0	0.621984	0	0	0	0	2.28438	0	0	0
GO_POSITIVE_REGULATION_OF_MULTICELLULAR_ORGANISMAL_PROCESS	0	0	0	0	0	0	0.720178	0.565852	0	0	0	3.94611	0	0	0
GO_REGULATION_OF_CELL_DEATH	0	0	0	0	0	0	0.217802	1.41401	0	0	0	2.58769	0	0	0
TGGAAA_V$NFAT_Q4_01	0	0	0	0	0	0	0	0	0	0	0	0	0	0	0
GO_DEFENSE_RESPONSE	0	0	0	0	0	0	5.15073	0	0	0	0	5.41856	0	0	0
GRAESSMANN_APOPTOSIS_BY_DOXORUBICIN_UP	0	0	0	0	0	0	3.79737	0	0	0	0	2.47597	0	0	0.553373
GO_REGULATION_OF_HYDROLASE_ACTIVITY	0	0	0	0	0	0	1.38128	0	0	0	0	0	0	0	0
TTGTTT_V$FOXO4_01	0	0	0	0	0	0	0	0	0	0	0	0	0.883364	0	0
TGANTCA_V$AP1_C	0	0	0	0	0	0	3.4511	0	0	0	0	0	0	0	0
GO_ADENYL_NUCLEOTIDE_BINDING	0	0	0	0	0	0	0	0	0	0	0	0	0	0	0
GO_PROTEIN_LOCALIZATION	0	0	0	0	0	0	0	0	0	0	0	0	0	0	0
GO_POSITIVE_REGULATION_OF_PROTEIN_METABOLIC_PROCESS	0	0.310202	0	0	0	0	0	0	0	0	0	4.242	0	0	0
CTTTGT_V$LEF1_Q2	0	0	0	0	0	0	0	0	0	0	0	0	0	0	0
GO_REGULATION_OF_CELL_PROLIFERATION	0	0	0	0	0	0	0	0	0	0	0	1.7648	0	0	0
RYTTCCTG_V$ETS2_B	0	0	0	0	0	0	3.08796	0	0	0	0	0	0	0	0
AACTTT_UNKNOWN	0	0	0	0	0	0	0	0	0	0	0	0	4.80133	0	0
GO_IMMUNE_RESPONSE	0	0	0	0	0	0	5.62583	0	0	0	0	6.67349	0	0	0
GO_NUCLEAR_OUTER_MEMBRANE_ENDOPLASMIC_RETICULUM_MEMBRANE_NETWORK	0	0	2.34152	0	0	0	5.07219	0	0	0	0	3.45048	0	0	0
GO_ENZYME_BINDING	0	0	0	0	0	0	0	1.41755	0	0	0	0	0	0	0
GO_REGULATION_OF_TRANSPORT	0	0	0	0	0	0	0	0	0	0	0	0.351855	0.992831	0	0
GO_NEGATIVE_REGULATION_OF_CELL_COMMUNICATION	0	0	0	0	0	0	0.566015	0	0	0	0	0.771356	0	0	0
GO_EXTRACELLULAR_SPACE	0	0	0	0	0	0	0.288979	0	0	0	0	0	0	0	0
GO_GOLGI_APPARATUS	0	0	0	0	0	0	0	0	0	0	0	0	0	0	0
DIAZ_CHRONIC_MEYLOGENOUS_LEUKEMIA_UP	0	0	0	0	0	0	0	0.537437	0	0	0	0	0	0	0
GO_BIOLOGICAL_ADHESION	0	0	0	0	0	0	2.66104	0	0	0	0	0.196012	0	0	0
GO_RESPONSE_TO_ENDOGENOUS_STIMULUS	0	0	0	0	0	0	0	0	0	0	0	2.0159	0	0	0
GO_REGULATION_OF_CELL_DIFFERENTIATION	0	0	0	0	0	0	0	1.62427	0	0	0	0	0	0	0
GO_CYTOSKELETON	0	0	0	0	0	0	0	0	0	0	0	0	0	0	0
MEISSNER_BRAIN_HCP_WITH_H3K4ME3_AND_H3K27ME3	0	0	0	0	0	0	1.42245	0	0	0	0	0	0.437831	0	0
GO_POSITIVE_REGULATION_OF_IMMUNE_SYSTEM_PROCESS	0	0	0	0	0	0	5.87493	0	0	0	0	5.66712	0	0	0
GO_INTRACELLULAR_VESICLE	0	0	0	0	0	0	0	0	0	0	0	0	0	0	0
GO_MACROMOLECULAR_COMPLEX_BINDING	0	0	0	0	0	0	0	0	0	0	0	0	0	0	0
DODD_NASOPHARYNGEAL_CARCINOMA_UP	0	0	0	0	0	0	0	0	0	0	0	0	0	0	0
NUYTTEN_EZH2_TARGETS_UP	0	0	0	0	0	0	2.20547	0	0	0	0	1.85246	0	0	0
GO_MOLECULAR_FUNCTION_REGULATOR	0	0	0	0	0	0	0	0	0	0	0	0	0	0	0
GO_NEGATIVE_REGULATION_OF_NITROGEN_COMPOUND_METABOLIC_PROCESS	0	0	0	0	0	0	0	0	0	0	0	0	0	0	0
PUJANA_BRCA1_PCC_NETWORK	0	0	0	0	0	0	0	0	0	0	0	0	0	0	0
GO_CELL_DEATH	0	0	0	0	0	0	1.90817	0	0	0	0	1.88397	0	0	0
GO_NEGATIVE_REGULATION_OF_MOLECULAR_FUNCTION	0	0.319422	0	0	0	0	0.941382	0	0	0	0	0	0	0	0
GO_RNA_BINDING	0	0	0	0	0	0	0	0	0	0	0	0	0	0	0
LOPEZ_MBD_TARGETS	0	0	0	0	0	0	2.63766	0	0	0	0	0	0	0	0
GO_TRANSITION_METAL_ION_BINDING	0	0	0	0	0	0	0	0	0	0	0	0	0	0	0
GO_SYSTEM_PROCESS	0	0	0	0	0	0	0	0	0	0	0	0	0	0	0
ZWANG_TRANSIENTLY_UP_BY_1ST_EGF_PULSE_ONLY	0	0	0	0	0	0	0	0	0	0	0	0	0	0	0
GO_ESTABLISHMENT_OF_PROTEIN_LOCALIZATION	0	0	0	0	0	0	0	0	0	0	0	0	0	0	0
REACTOME_IMMUNE_SYSTEM	0	0	0	0	0	0	3.18178	0	0	0	0	1.719	0	0	0
GO_NEGATIVE_REGULATION_OF_MULTICELLULAR_ORGANISMAL_PROCESS	0	0	0	0	0	0	1.05908	0	0	0	0	0.851011	0	0	0
GO_POSITIVE_REGULATION_OF_TRANSCRIPTION_FROM_RNA_POLYMERASE_II_PROMOTER	0	0	0	0	0	0	0.771493	0	0	0	0	0	0	0	0
GO_NEGATIVE_REGULATION_OF_PROTEIN_METABOLIC_PROCESS	0	0	0	0	0	0	0.200446	0	0	0	0	0	0	0	0
GO_LOCOMOTION	0	0	0	0	0	0	0	0	0	0	0	2.25703	0	0	0
GO_LIPID_METABOLIC_PROCESS	0	0	1.03023	0	0	0	0	2.58009	0	0	0	4.17185	5.35201	0	0
GO_ESTABLISHMENT_OF_LOCALIZATION_IN_CELL	0	0	0	0	0	0	0	1.63617	0	0	0	0	0	0	0
MODULE_45	0	0	0	0	0	0	9.62667	0	0	0	0	4.39389	0	0	0
GO_POSITIVE_REGULATION_OF_DEVELOPMENTAL_PROCESS	0	0	0	0	0	0	0	3.0187	0	0	0	0	0	0	0
GGGTGGRR_V$PAX4_03	0	0	0	0	0	0	0	0	0	0	0	0	0	0	0
GO_NEGATIVE_REGULATION_OF_GENE_EXPRESSION	0	0	0	0	0	0	0	0	0	0	0	0	0	0	0
MODULE_84	0	0	0	0	0	0	10.6836	0	0	0	0	8.16099	0	0	0
GO_RESPONSE_TO_CYTOKINE	0	0	0	0	0	0	5.63778	0	0	0	0	1.49227	0	0	0
WONG_ADULT_TISSUE_STEM_MODULE	0	0	0	0	0	0	4.66457	0.149811	0	0	0	2.03241	1.21059	0	0
GO_EPITHELIUM_DEVELOPMENT	0	0	0	0	0	0	0.642505	1.23961	0	0	0	0	0	0	0
GO_IDENTICAL_PROTEIN_BINDING	0	0	0	0	0	0	0	0	0	0	0	0	0	0	0
GO_CELL_DEVELOPMENT	0	0	0	0	0	0	0	0	0	0	0	0	0.102583	0	0
MILI_PSEUDOPODIA_CHEMOTAXIS_DN	0	0	0	0	0	0	12.2992	0	0	0	0	1.10108	0	0	0
GO_RESPONSE_TO_BIOTIC_STIMULUS	0	0	0	0	0	0	3.39015	0	0	0	0	6.71658	0	0	0
DANG_BOUND_BY_MYC	0	0	0	0	0	0	0	1.25649	0	0	0	0	0	0	0
GO_RECEPTOR_ACTIVITY	0	0	0	0	0	0	0	0	0	0	0	2.37281	0	0	0
GO_VACUOLE	0	0	0	0	0	0	0	0	0	0	0	4.26655	0	0	0
GO_SIGNAL_TRANSDUCER_ACTIVITY	0	0	0	0	0	0	0	0	0	0	0	1.52925	0	0	0
GO_REPRODUCTION	0	0	0	0	0	0	0	0	0	0	0	0	0	0	0
YOSHIMURA_MAPK8_TARGETS_UP	0	0	0	0	0	0	0	1.61074	0	0	0	0	0	0	0
MODULE_5	0	0	0	0	0	0	12.8955	0	0	0	0	4.16164	0	0	0
GO_POSITIVE_REGULATION_OF_PROTEIN_MODIFICATION_PROCESS	0	0	0	0	0	0	0	0	0	0	0	1.87604	0	0	0
GO_VESICLE_MEDIATED_TRANSPORT	0	0	0	0	0	0	0	0	0	0	0	0	0	0	0
GO_MOVEMENT_OF_CELL_OR_SUBCELLULAR_COMPONENT	0	0	0	0	0	0	0	0	0	0	0	0	0	0	0
PUJANA_ATM_PCC_NETWORK	0	0	0	0	0	0	0	0	0	0	0	0	0	0	0
GO_RECEPTOR_BINDING	0	0	0	0	0	0	0	0.495004	0	0	0	0	0	0	0
GO_MITOCHONDRION	0	0	0.884146	0	0	0	0	8.79721	0	0	0	0	3.31203	0	0
GRAESSMANN_APOPTOSIS_BY_DOXORUBICIN_DN	0	0	0	0	0	0	0	0	0	0	0	0	0.187967	0	0
MARTENS_BOUND_BY_PML_RARA_FUSION	0	1.95646	0	0	0	0	11.8748	0	0	0	0	0.8269	0	0	0
GO_RESPONSE_TO_LIPID	0	0	0	0	0	0	0.657042	0	0	0	0	4.84249	0	0	0
KRIGE_RESPONSE_TO_TOSEDOSTAT_24HR_DN	0	0	0	0	0	0	0.224975	0	0	0	0	0	0	0	0
GO_REGULATION_OF_TRANSFERASE_ACTIVITY	0	0	0	0	0	0	0.13512	0	0	0	0	0.406121	0	0	0
GO_CARBOHYDRATE_DERIVATIVE_METABOLIC_PROCESS	0	0	0	0	0	0	0	2.68098	0	0	0	0	2.79551	0	0
BRUINS_UVC_RESPONSE_LATE	0	0	0	0	0	0	0	0	0	0	0	0	0.832646	0	0
GO_POSITIVE_REGULATION_OF_CELLULAR_COMPONENT_ORGANIZATION	0	0	0	0	0	0	0	0.766527	0	0	0	0	0	0	0
GO_REGULATION_OF_ORGANELLE_ORGANIZATION	0	0	0	0	0	0	0	0	0	0	0	0	0	0	0
GO_HOMEOSTATIC_PROCESS	0	0	0	0	0	0	0	0	0	0	0	0	0	0	0
GO_CELL_PROJECTION	0	0	0	0	0	0	0	0	0	0	0	0	0	0	0
RODWELL_AGING_KIDNEY_UP	0	0	0	0	0	0	11.2036	0	0	0	0	2.03006	0	0	0
MODULE_55	0	0	0	0	0	0	1.57533	0	0	0	0	0	0	0	0
MODULE_88	0	0	0	0	0	0	1.55866	0	0	0	0	0	0	0	0
GO_POSITIVE_REGULATION_OF_INTRACELLULAR_SIGNAL_TRANSDUCTION	0	0	0	0	0	0	0.824483	0	0	0	0	0.656952	0	0	0
GO_REGULATION_OF_RESPONSE_TO_EXTERNAL_STIMULUS	0	0	0	0	0	0	0.346136	0	0	0	0	0	0	0	0
CACGTG_V$MYC_Q2	0	0	0	0	0	0	0	0	0	0	0	0	0	0	0
PEREZ_TP53_TARGETS	0	0	0	0	0	0	0	0	0	0	0	1.45651	0.066271	0	0
GO_RESPONSE_TO_ABIOTIC_STIMULUS	0	0	0	0	0	0	0	0	0	0	0	0	0	0	0
GATTGGY_V$NFY_Q6_01	0	0	0	0	0	0	0	0	0	0	0	0	0	0	0
MARSON_BOUND_BY_FOXP3_UNSTIMULATED	0	0	0	0	0	0	0	0	0	0	0	0	0	0	0
ZWANG_TRANSIENTLY_UP_BY_2ND_EGF_PULSE_ONLY	0	0	0	0	0	0	0	0	0	0	0	0	0	0	0
GO_CELLULAR_CATABOLIC_PROCESS	0	0	0.284107	0	0	0	0	0	0	0	0	0	0	0	0
GO_REGULATION_OF_CYTOKINE_PRODUCTION	0	0.214644	0	0	0	0	6.81339	0	0	0	0	6.78882	0	0	0
GO_REGULATION_OF_IMMUNE_RESPONSE	0	0	0	0	0	0	1.82703	0	0	0	0	4.26696	0	0	0
WAKABAYASHI_ADIPOGENESIS_PPARG_RXRA_BOUND_8D	0	0	0	0	0	0	0.616867	0	0	0	0	0	0	0	0
GO_ORGANIC_ACID_METABOLIC_PROCESS	0	0	1.29419	0	0	0	0	1.29366	0	0	0	0	5.15889	0	0
GO_SINGLE_ORGANISM_CATABOLIC_PROCESS	0	0	1.17416	0	0	0	0	0	0	0	0	0	2.23187	0	0
NABA_MATRISOME	0	0	0	0	0	0	0	0	0	0	0	0.452415	0	0	0
GO_POSITIVE_REGULATION_OF_PHOSPHATE_METABOLIC_PROCESS	0	0	0	0	0	0	0	0	0	0	0	1.89317	0	0	0
GO_POSITIVE_REGULATION_OF_PHOSPHORUS_METABOLIC_PROCESS	0	0	0	0	0	0	0	0	0	0	0	1.89317	0	0	0
GO_ORGANONITROGEN_COMPOUND_BIOSYNTHETIC_PROCESS	0	0	0	0	0	0	0	4.74567	0	0	0	0	0	0	0
GO_POLY_A_RNA_BINDING	0	0	0	0	0	0	0	0	0	0	0	0	0	0	0
SCGGAAGY_V$ELK1_02	0	0	0	0	0	0	0	0	0	0	0	0	0	0	0
GO_PHOSPHORYLATION	0	0	0	0	0	0	0	0	0	0	0	0	0	0	0
GO_PROTEIN_COMPLEX_SUBUNIT_ORGANIZATION	0	0	0	0	0	0	0	0	0	0	0	0	0	0	0
GO_REGULATION_OF_CELLULAR_COMPONENT_MOVEMENT	0	0	0	0	0	0	1.52935	0	0	0	0	0	0	0	0
GRADE_COLON_CANCER_UP	0	0	1.58102	0	0	0	0.805841	0	0	0	0	0	0	0	0
KRIGE_RESPONSE_TO_TOSEDOSTAT_6HR_DN	0	0	0	0	0	0	0.4687	0	0	0	0	0	0	0	0
GO_GOLGI_APPARATUS_PART	0	0	0	0	0	0	0.286875	0	0	0	0	0	0	0	0
GO_POSITIVE_REGULATION_OF_HYDROLASE_ACTIVITY	0	0	0	0	0	0	0	0	0	0	0	0.732409	0	0	0
MODULE_38	0	0	0	0	0	0	7.6741	0	0	0	0	3.86129	0	0	0
GO_REGULATION_OF_DEFENSE_RESPONSE	0	0	0	0	0	0	1.73736	0	0	0	0	1.49148	0	0	0
GO_NEGATIVE_REGULATION_OF_CATALYTIC_ACTIVITY	0	0.569892	0	0	0	0	0.624684	0	0	0	0	0	0	0	0
GO_CARDIOVASCULAR_SYSTEM_DEVELOPMENT	0	0	0	0	0	0	0.565675	0	0	0	0	0.245835	0	0	0
GO_CIRCULATORY_SYSTEM_DEVELOPMENT	0	0	0	0	0	0	0.565675	0	0	0	0	0.245835	0	0	0
GO_CELLULAR_LIPID_METABOLIC_PROCESS	0	0	0.0503837	0	0	0	0	1.18489	0	0	0	1.45533	6.309	0	0
GO_RESPONSE_TO_ORGANIC_CYCLIC_COMPOUND	0	0	0	0	0	0	0	0	0	0	0	2.89401	0	0	0
TGACCTY_V$ERR1_Q2	0	0	0	0	0	0	0	0.880637	0	0	0	0	0	0	0
GO_REGULATION_OF_ANATOMICAL_STRUCTURE_MORPHOGENESIS	0	0	0	0	0	0	0	0	0	0	0	0	0	0	0
GO_CELL_JUNCTION	0	0	0	0	0	0	0	0	0	0	0	0	0	0	0
MODULE_60	0	0	0	0	0	0	9.03539	0	0	0	0	1.58164	0	0	0
GO_ZINC_ION_BINDING	0	0	0	0	0	0	0	0	0	0	0	0	0	0	0
GO_MACROMOLECULAR_COMPLEX_ASSEMBLY	0	0	0	0	0	0	0	0	0	0	0	0	0	0	0
GO_CELLULAR_RESPONSE_TO_CYTOKINE_STIMULUS	0	0	0	0	0	0	3.91158	0	0	0	0	0.167239	0	0	0
GO_REGULATION_OF_KINASE_ACTIVITY	0	0	0	0	0	0	0.384094	0	0	0	0	1.52156	0	0	0
KRIGE_RESPONSE_TO_TOSEDOSTAT_6HR_UP	0	0	0	0	0	0	0	0	0	0	0	0	0	0	0
BENPORATH_NANOG_TARGETS	0	0	0	0	0	0	0	0	0	0	0	0	0	0	0
GO_PROTEIN_DIMERIZATION_ACTIVITY	0	0	0	0	0	0	0	0	0	0	0	0	0	0	0
GO_PROTEOLYSIS	0	0	0.232581	0	0	0	0	0	0	0	0	0	0	0	0
GO_CELLULAR_MACROMOLECULE_LOCALIZATION	0	0	0	0	0	0	0	0	0	0	0	0	0	0	0
DODD_NASOPHARYNGEAL_CARCINOMA_DN	0	0	0	0	0	0	0	0	0	0	0	0	0	0	0
GO_NEUROGENESIS	0	0	0	0	0	0	0	0	0	0	0	0	0.506329	0	0
GO_ENZYME_REGULATOR_ACTIVITY	0	0	0	0	0	0	0	0	0	0	0	0	0	0	0
GO_TRANSFERASE_ACTIVITY_TRANSFERRING_PHOSPHORUS_CONTAINING_GROUPS	0	0	0	0	0	0	0	0	0	0	0	0	0	0	0
GO_CYTOSKELETAL_PART	0	0	0	0	0	0	0	0	0	0	0	0	0	0	0
GO_RESPONSE_TO_WOUNDING	0	0	0	0	0	0	3.25554	0	0	0	0	0.809536	0	0	0
GO_CELL_MOTILITY	0	0	0	0	0	0	0	0	0	0	0	1.44503	0	0	0
GO_LOCALIZATION_OF_CELL	0	0	0	0	0	0	0	0	0	0	0	1.44503	0	0	0
GO_NEGATIVE_REGULATION_OF_CELL_DEATH	0	0	0	0	0	0	0	1.32765	0	0	0	0.676669	0	0	0
GO_RESPONSE_TO_HORMONE	0	0	0	0	0	0	0	0	0	0	0	1.11218	0	0	0
GO_EMBRYO_DEVELOPMENT	0	0	0	0	0	0	0	0	0	0	0	0	0	0	0
GO_ANATOMICAL_STRUCTURE_FORMATION_INVOLVED_IN_MORPHOGENESIS	0	0	0	0	0	0	0	0	0	0	0	0.170402	0	0	0
GO_CELLULAR_RESPONSE_TO_ENDOGENOUS_STIMULUS	0	0	0	0	0	0	0	0	0	0	0	0	0	0	0
TATAAA_V$TATA_01	0	0	0	0	0	0	0	0	0	0	0	0	0	0	0
GO_CELL_CYCLE	0	0	0	0	0	0	0	0	0	0	0	0	0	0	0
HALLMARK_TNFA_SIGNALING_VIA_NFKB	0	0	0	0	0	0	17.6246	0	0	0	0	8.48533	0	0	0
GO_IMMUNE_SYSTEM_DEVELOPMENT	0	0	0	0	0	0	2.44312	0	0	0	0	3.42922	0	0	0
GRAESSMANN_RESPONSE_TO_MC_AND_DOXORUBICIN_UP	0	0	0	0	0	0	1.97606	0	0	0	0	0	0	0	0
GO_REGULATION_OF_CELL_ADHESION	0	0	0	0	0	0	1.89447	0	0	0	0	1.32265	0	0	0
GO_GOLGI_MEMBRANE	0	0	0	0	0	0	0.754148	0	0	0	0	0	0	0	0
GO_MACROMOLECULE_CATABOLIC_PROCESS	0	0	0	0	0	0	0	0	0	0	0	0	0	0	0
CTTTAAR_UNKNOWN	0	0	0	0	0	0	0	0	0	0	0	0	0	0	0
GO_ENVELOPE	0	0	0.746978	0	0	0	0	3.90964	0	0	0	0	0.635138	0	0
LINDGREN_BLADDER_CANCER_CLUSTER_2B	0	0	0	0	0	0	7.99377	0	0	0	0	0.606005	0	0	0
MODULE_75	0	0	0	0	0	0	7.69599	0	0	0	0	1.098	0	0	0
GO_CELL_ACTIVATION	0	0	0	0	0	0	2.45433	0	0	0	0	1.4011	0	0	0
LEE_BMP2_TARGETS_UP	0	0	0	0	0	0	0	1.6952	0	0	0	3.74886	1.25557	0	0
BENPORATH_MYC_MAX_TARGETS	0	0	0	0	0	0	0	0	0	0	0	0	0	0	0
LEE_BMP2_TARGETS_DN	0	0	0	0	0	0	0	0	0	0	0	0	0	0	0
GOBERT_OLIGODENDROCYTE_DIFFERENTIATION_DN	0	0	0	0	0	0	0	0	0	0	0	0	5.82005	0	0
GO_REGULATION_OF_CELLULAR_LOCALIZATION	0	0	0	0	0	0	0	0	0	0	0	0.3911	0	0	0
MODULE_6	0	0	0	0	0	0	5.96137	0	0	0	0	1.22192	0	0	0
FULCHER_INFLAMMATORY_RESPONSE_LECTIN_VS_LPS_UP	0	0	0	0	0	0	2.37803	0	0	0	0	0	0	0	0
GO_CELL_PROLIFERATION	0	0	0	0	0	0	0	0	0	0	0	0.0406454	0	0	0
BUYTAERT_PHOTODYNAMIC_THERAPY_STRESS_UP	0	0	0	0	0	0	0	0	0	0	0	0	0	0	0
GO_CELLULAR_RESPONSE_TO_OXYGEN_CONTAINING_COMPOUND	0	0	0	0	0	0	0	0	0	0	0	0	0	0	0
GO_RESPONSE_TO_NITROGEN_COMPOUND	0	0	0	0	0	0	0	0	0	0	0	0	0	0	0
GO_SIGNALING_RECEPTOR_ACTIVITY	0	0	0	0	0	0	0	0	0	0	0	2.42544	0	0	0
GCANCTGNY_V$MYOD_Q6	0	0	0	0	0	0	0	0	0	0	0	0	0	0	0
BYSTRYKH_HEMATOPOIESIS_STEM_CELL_QTL_TRANS	0	0	0	0	0	0	0	0	0	0	0	0	0	0	0
GO_PROTEIN_PHOSPHORYLATION	0	0	0	0	0	0	0	0	0	0	0	0	0	0	0
MULLIGHAN_MLL_SIGNATURE_1_UP	0	0	0	0	0	0	6.97075	0	0	0	0	0.112841	0	0	0
MODULE_46	0	0	0	0	0	0	6.72669	0	0	0	0	1.21971	0	0	0
GO_INNATE_IMMUNE_RESPONSE	0	0	0	0	0	0	3.37283	0	0	0	0	3.86129	0	0	0
GO_REGULATION_OF_PROTEOLYSIS	0	0.273355	0	0	0	0	0	0	0	0	0	0	0	0	0
LASTOWSKA_NEUROBLASTOMA_COPY_NUMBER_DN	0	0	0	0	0	0	0	0	0	0	0	0	0	0	0
RNGTGGGC_UNKNOWN	0	0	0	0	0	0	0	0	0	0	0	0	0	0	0
KOINUMA_TARGETS_OF_SMAD2_OR_SMAD3	0	0	0	0	0	0	0	0	0	0	0	0	0	0	0
GO_OXIDATION_REDUCTION_PROCESS	0	0	0	0	0	0	0	7.31999	0	0	0	0	2.12254	0	0
GO_ORGANOPHOSPHATE_METABOLIC_PROCESS	0	0	0	0	0	0	0	2.76244	0	0	0	0	1.32556	0	0
GO_PROTEIN_COMPLEX_BINDING	0	0	0	0	0	0	0	0	0	0	0	0	0	0	0
GO_RESPONSE_TO_BACTERIUM	0	0	0	0	0	0	3.53684	0	0	0	0	5.77615	0	0	0
WEST_ADRENOCORTICAL_TUMOR_DN	0	0	0	0	0	0	1.58592	2.26907	0	0	0	0.0691574	0.0787123	0	0
GO_NEGATIVE_REGULATION_OF_PROTEIN_MODIFICATION_PROCESS	0	0	0	0	0	0	0.0708719	0	0	0	0	0	0	0	0
FEVR_CTNNB1_TARGETS_UP	0	0	0	0	0	0	0	0	0	0	0	0	0	0	0
IVANOVA_HEMATOPOIESIS_STEM_CELL_AND_PROGENITOR	0	0	0	0	0	0	0	0	0	0	0	0	0	0	0
GO_CALCIUM_ION_BINDING	0	0	0	0	0	0	0	0	0	0	0	0	0	0	0
GO_REGULATION_OF_CELLULAR_COMPONENT_BIOGENESIS	0	0	0	0	0	0	0	0	0	0	0	0	0	0	0
GO_POSITIVE_REGULATION_OF_CELL_DIFFERENTIATION	0	0	0	0	0	0	0	2.63408	0	0	0	0	0	0	0
GO_POSITIVE_REGULATION_OF_TRANSPORT	0	0	0	0	0	0	0	0	0	0	0	1.98968	0.893959	0	0
GO_REGULATION_OF_CELL_CYCLE	0	0	0	0	0	0	0	0	0	0	0	0	0	0	0
GO_SEQUENCE_SPECIFIC_DNA_BINDING	0	0	0	0	0	0	0	0	0	0	0	0	0	0	0
GO_NUCLEIC_ACID_BINDING_TRANSCRIPTION_FACTOR_ACTIVITY	0	0	0	0	0	0	0	0	0	0	0	0	0	0	0
GO_PROTEIN_COMPLEX_BIOGENESIS	0	0	0	0	0	0	0	0	0	0	0	0	0	0	0
GO_PROTEIN_COMPLEX_ASSEMBLY	0	0	0	0	0	0	0	0	0	0	0	0	0	0	0
GO_MEMBRANE_REGION	0	0	0	0	0	0	0	0	0	0	0	0	1.36094	0	0
CTTTGA_V$LEF1_Q2	0	0	0	0	0	0	0	0	0	0	0	0	0	0	0
GO_ION_TRANSPORT	0	0	0	0	0	0	0	0.942417	0	0	0	0	0	0	0
GO_INFLAMMATORY_RESPONSE	0	0	0	0	0	0	3.74895	0	0	0	0	3.49067	0	0	0
REN_ALVEOLAR_RHABDOMYOSARCOMA_DN	0	0	0	0	0	0	3.34341	0	0	0	0	0.181871	0	0	0
GARY_CD5_TARGETS_UP	0	0	0	0	0	0	2.85369	0	0	0	0	1.04068	0	0	0
GO_WOUND_HEALING	0	0	0	0	0	0	2.6721	0	0	0	0	0	0	0	0
GO_VASCULATURE_DEVELOPMENT	0	0	0	0	0	0	2.20312	0	0	0	0	1.8081	0	0	0
MODULE_64	0	0	0	0	0	0	1.52697	0	0	0	0	0	0	0	0
BUYTAERT_PHOTODYNAMIC_THERAPY_STRESS_DN	0	0	0	0	0	0	0	0	0	0	0	0	0	0	0
FORTSCHEGGER_PHF8_TARGETS_DN	0	0	0	0	0	0	0	0	0	0	0	0	0	0	0
GO_PEPTIDYL_AMINO_ACID_MODIFICATION	0	0	0	0	0	0	0	0	0	0	0	0	0	0	0
GO_ORGAN_MORPHOGENESIS	0	0	0	0	0	0	0	0	0	0	0	0	0	0	0
GO_CATALYTIC_COMPLEX	0	0	0	0	0	0	0	0	0	0	0	0	0	0	0
MODULE_1	0	0	0	0	0	0	4.54306	0	0	0	0	3.68988	0	0	0
ZHOU_INFLAMMATORY_RESPONSE_LIVE_UP	0	0	0	0	0	0	2.84702	0	0	0	0	0	0	0	0
MODULE_52	0	0	0	0	0	0	2.50526	0	0	0	0	0	0	0	0
BROWNE_HCMV_INFECTION_48HR_DN	0	0	0	0	0	0	1.57808	0	0	0	0	0	0	0	0
GO_POSITIVE_REGULATION_OF_IMMUNE_RESPONSE	0	0	0	0	0	0	1.3619	0	0	0	0	3.35461	0	0	0
GO_NEGATIVE_REGULATION_OF_PHOSPHORUS_METABOLIC_PROCESS	0	0	0	0	0	0	0.609887	0	0	0	0	0	0	0	0
GO_NEGATIVE_REGULATION_OF_PHOSPHATE_METABOLIC_PROCESS	0	0	0	0	0	0	0.609887	0	0	0	0	0	0	0	0
MARTINEZ_TP53_TARGETS_DN	0	0	0	0	0	0	0.0363967	0	0	0	0	0	0.120406	0	0
GO_VACUOLAR_PART	0	0	0	0	0	0	0	0	0	0	0	2.93946	0	0	0
GO_REGULATION_OF_MAPK_CASCADE	0	0	0	0	0	0	0	0	0	0	0	2.86581	0	0	0
GO_REGULATION_OF_GTPASE_ACTIVITY	0	0	0	0	0	0	0	0	0	0	0	0	0	0	0
KRIGE_RESPONSE_TO_TOSEDOSTAT_24HR_UP	0	0	0	0	0	0	0	0	0	0	0	0	0	0	0
KRIEG_HYPOXIA_NOT_VIA_KDM3A	0	0	0	0	0	0	0	0	0	0	0	0	0	0	0
GO_KINASE_ACTIVITY	0	0	0	0	0	0	0	0	0	0	0	0	0	0	0
ACEVEDO_LIVER_CANCER_UP	0	0	0	0	0	0	0	0	0	0	0	0	0	0	0
GO_REGULATION_OF_PROTEIN_LOCALIZATION	0	0	0	0	0	0	0	0	0	0	0	0	0	0	0
MARSON_BOUND_BY_FOXP3_STIMULATED	0	0	0	0	0	0	0	0	0	0	0	0	0	0	0
GSE45365_NK_CELL_VS_CD11B_DC_DN	0	0	0	0	0	0	11.7019	0	0	0	0	0.78145	0	0	0
GSE32986_CURDLAN_HIGHDOSE_VS_GMCSF_AND_CURDLAN_HIGHDOSE_STIM_DC_DN	0	0	0	0	0	0	11.2567	0	0	0	0	0.640627	0	0	0
GO_POSITIVE_REGULATION_OF_CYTOKINE_PRODUCTION	0	0	0	0	0	0	4.45712	0	0	0	0	5.52257	0	0	0
MULLIGHAN_MLL_SIGNATURE_2_UP	0	0	0	0	0	0	3.3036	0	0	0	0	0.674782	0	0	0
SWEET_LUNG_CANCER_KRAS_UP	0	0	0	0	0	0	1.28234	0.0230129	0	0	0	0	0	0	0
ENK_UV_RESPONSE_KERATINOCYTE_UP	0	0	0	0	0	0	0.46839	0	0	0	0	2.91988	0	0	0
MARTINEZ_RB1_TARGETS_UP	0	0	0	0	0	0	0	0	0	0	0	0	0	0	0
RODRIGUES_THYROID_CARCINOMA_POORLY_DIFFERENTIATED_DN	0	0	0	0	0	0	0	1.30992	0	0	0	0	0	0	0
GO_CELLULAR_AMIDE_METABOLIC_PROCESS	0	0	0	0	0	0	0	0	0	0	0	0	0	0	0
GO_TRANSCRIPTION_FROM_RNA_POLYMERASE_II_PROMOTER	0	0	0	0	0	0	0	0	0	0	0	0	0	0	0
GO_REGULATION_OF_CATABOLIC_PROCESS	0	0	0.578342	0	0	0	0	0	0	0	0	0	0	0	0
TTANTCA_UNKNOWN	0	0	0	0	0	0	0	0	0	0	0	0	0	0	0
FULCHER_INFLAMMATORY_RESPONSE_LECTIN_VS_LPS_DN	0	0	0	0	0	0	2.59706	0	0	0	0	3.76209	0	0	0
BOQUEST_STEM_CELL_CULTURED_VS_FRESH_UP	0	0	0	0	0	0	2.30191	0	0	0	0	0.980309	0.919127	0	0
REACTOME_HEMOSTASIS	0	0	0	0	0	0	1.31333	0	0	0	0	0	0	0	0
ZHOU_INFLAMMATORY_RESPONSE_FIMA_UP	0	0	0	0	0	0	1.24731	0	0	0	0	0	0	0	0
GO_LIPID_BIOSYNTHETIC_PROCESS	0	0	0	0	0	0	0.182857	0	0	0	0	0.176813	0	0	0
MARTINEZ_RB1_AND_TP53_TARGETS_DN	0	0	0	0	0	0	0	0	0	0	0	0	0.142429	0	0
NABA_MATRISOME_ASSOCIATED	0	0	0	0	0	0	0	0	0	0	0	0	0	0	0
GTGCCTT,MIR-506	0	0	0	0	0	0	0	0	0	0	0	0	0	0	0
GO_RIBONUCLEOPROTEIN_COMPLEX	0	0	0	0	0	0	0	0	0	0	0	0	0	0	0
GO_NEGATIVE_REGULATION_OF_TRANSCRIPTION_FROM_RNA_POLYMERASE_II_PROMOTER	0	0	0	0	0	0	0	0	0	0	0	0	0.300177	0	0
ONKEN_UVEAL_MELANOMA_UP	0	0	0	0	0	0	0	0	0	0	0	0	0	0	0
MARTENS_TRETINOIN_RESPONSE_UP	0	0	0	0	0	0	0	0	0	0	0	0	0	0	0
ACEVEDO_LIVER_TUMOR_VS_NORMAL_ADJACENT_TISSUE_UP	0	0	0	0	0	0	0	0	0	0	0	0	0	0	0
GO_NUCLEOLUS	0	0	0	0	0	0	0	0	0	0	0	0	0	0	0
GO_TRANSPORTER_ACTIVITY	0	0	1.47901	0	0	0	0	1.30119	0	0	0	0	0	0	0
MODULE_24	0	0	0	0	0	0	1.21462	0	0	0	0	0	0	0	0
LIM_MAMMARY_STEM_CELL_UP	0	0	0	0	0	0	0.409227	0	0	0	0	0	0.592795	0	0
MODULE_16	0	0	0	0	0	0	0.167509	0	0	0	0	0	0	0	0
DOUGLAS_BMI1_TARGETS_UP	0	0	0	0	0	0	0	0	0	0	0	0	0	0	0
GO_CARBOHYDRATE_DERIVATIVE_BIOSYNTHETIC_PROCESS	0	0	0	0	0	0	0	2.16278	0	0	0	0	0	0	0
GO_CELL_CELL_ADHESION	0	0	0	0	0	0	0	0	0	0	0	0	0	0	0
GTGACGY_V$E4F1_Q6	0	0	0	0	0	0	0	0	0	0	0	0	0	0	0
GO_OXIDOREDUCTASE_ACTIVITY	0	0	0	0	0	0	0	1.90858	0	0	0	0	0	0	0
MIKKELSEN_ES_ICP_WITH_H3K4ME3	0	0	0	0	0	0	0	0	0	0	0	0	0	0	0
GO_DOUBLE_STRANDED_DNA_BINDING	0	0	0	0	0	0	0	0	0	0	0	0	0	0	0
GO_PROTEIN_HOMODIMERIZATION_ACTIVITY	0	0	0	0	0	0	0	0	0	0	0	0	0	0	0
GO_REGULATORY_REGION_NUCLEIC_ACID_BINDING	0	0	0	0	0	0	0	0	0	0	0	0	0	0	0
GO_POSITIVE_REGULATION_OF_CELL_PROLIFERATION	0	0	0	0	0	0	0	0	0	0	0	0	0	0	0
GO_NEGATIVE_REGULATION_OF_DEVELOPMENTAL_PROCESS	0	0	0	0	0	0	0	0	0	0	0	0	0	0	0
GO_RNA_PROCESSING	0	0	0	0	0	0	0	0	0	0	0	0	0	0	0
BRUINS_UVC_RESPONSE_VIA_TP53_GROUP_A	0	0	0	0	0	0	0	0	0	0	0	0	0	0	0
GO_CHROMOSOME	0	0	0	0	0	0	0	0	0	0	0	0	0	0	0
GO_PROTEIN_MODIFICATION_BY_SMALL_PROTEIN_CONJUGATION_OR_REMOVAL	0	0	0	0	0	0	0	0	0	0	0	0	0	0	0
RTAAACA_V$FREAC2_01	0	0	0	0	0	0	0	0	0	0	0	0	0	0	0
GSE10325_BCELL_VS_MYELOID_DN	0	1.19008	0	0	0	0	10.7995	0	0	0	0	3.01746	0	0	0
VERHAAK_GLIOBLASTOMA_MESENCHYMAL	0	0	0	0	0	0	8.80048	0	0	0	0	5.57868	0	0	0
GO_RESPONSE_TO_MOLECULE_OF_BACTERIAL_ORIGIN	0	0	0	0	0	0	3.82408	0	0	0	0	4.78981	0	0	0
GO_ACTIVATION_OF_IMMUNE_RESPONSE	0	0	0	0	0	0	2.29444	0	0	0	0	0.96307	0	0	0
MODULE_2	0	0	0	0	0	0	2.07624	0.675659	0	0	0	2.07947	0	0	0
chr19q13	0	0	0	0	0	0	0.191617	0	0	0	0	0	0	0	0
GO_TUBE_DEVELOPMENT	0	0	0	0	0	0	0	0	0	0	0	0	0	0	0
GO_POSITIVE_REGULATION_OF_CELL_DEATH	0	0	0	0	0	0	0	0	0	0	0	1.25758	0	0	0
GO_INTERSPECIES_INTERACTION_BETWEEN_ORGANISMS	0	0	0	0	0	0	0	0	0	0	0	0	0	0	0
GO_SYMBIOSIS_ENCOMPASSING_MUTUALISM_THROUGH_PARASITISM	0	0	0	0	0	0	0	0	0	0	0	0	0	0	0
GO_CELL_SURFACE	0	0	0	0	0	0	0	0	0	0	0	0.57386	0	0	0
GO_REGULATION_OF_CELLULAR_RESPONSE_TO_STRESS	0	0	0	0	0	0	0	0	0	0	0	0	0	0	0
BENPORATH_SOX2_TARGETS	0	0	0	0	0	0	0	0	0	0	0	0	0	0	0
MGGAAGTG_V$GABP_B	0	0	0	0	0	0	0	0	0	0	0	0	0	0	0
GO_ENDOSOME	0	0	0	0	0	0	0	0	0	0	0	0	0	0	0
GO_CENTRAL_NERVOUS_SYSTEM_DEVELOPMENT	0	0	0	0	0	0	0	0	0	0	0	0	2.55407	0	0
GO_TRANSMEMBRANE_TRANSPORT	0	0	0.0956574	0	0	0	0	1.65695	0	0	0	0	0	0	0
GSE10325_LUPUS_BCELL_VS_LUPUS_MYELOID_DN	0	0.995918	0	0	0	0	8.99085	0	0	0	0	2.5958	0	0	0
GSE14769_UNSTIM_VS_40MIN_LPS_BMDM_DN	0	0	0	0	0	0	8.78713	0	0	0	0	4.21751	0	0	0
GSE22196_HEALTHY_VS_OBESE_MOUSE_SKIN_GAMMADELTA_TCELL_DN	0	0	0	0	0	0	8.26519	0	0	0	0	2.26821	0	0	0
HALLMARK_INFLAMMATORY_RESPONSE	0	0	0	0	0	0	7.95385	0	0	0	0	1.35398	0	0	0
MARKEY_RB1_ACUTE_LOF_DN	0	0	0	0	0	0	7.137	0	0	0	0	0	0	0	0
STK33_UP	0	0	0	0	0	0	5.16737	0	0	0	0	1.54078	0	0	0
MODULE_44	0	0	0	0	0	0	3.42849	0	0	0	0	0	0	0	0
MONNIER_POSTRADIATION_TUMOR_ESCAPE_DN	0	0	0	0	0	0	2.18589	0	0	0	0	0	0	0	0
GO_LEUKOCYTE_ACTIVATION	0	0	0	0	0	0	1.27623	0	0	0	0	1.84193	0	0	0
FOSTER_TOLERANT_MACROPHAGE_DN	0	0	0	0	0	0	1.20486	0	0	0	0	0	0	0	0
GO_REGULATION_OF_RESPONSE_TO_WOUNDING	0	0	0	0	0	0	1.20486	0	0	0	0	0	0	0	0
MODULE_3	0	0	0	0	0	0	1.18125	0	0	0	0	0	0	0	0
JOHNSTONE_PARVB_TARGETS_3_UP	0	0	0	0	0	0	1.18125	0	0	0	0	3.76209	0	0	0
GO_IMMUNE_EFFECTOR_PROCESS	0	0	0	0	0	0	1.11099	0	0	0	0	0	0	0	0
GO_POSITIVE_REGULATION_OF_LOCOMOTION	0	0	0	0	0	0	1.0419	0	0	0	0	0	0	0	0
GO_CYTOKINE_MEDIATED_SIGNALING_PATHWAY	0	0	0	0	0	0	0.928606	0	0	0	0	1.58164	0	0	0
SWEET_LUNG_CANCER_KRAS_DN	0	0	0	0	0	0	0.49963	0.0043158	0	0	0	0	4.57468	0	0
GO_REGULATION_OF_CELL_ACTIVATION	0	0	0	0	0	0	0.479189	0	0	0	0	3.78492	0	0	0
DELYS_THYROID_CANCER_UP	0	0	0	0	0	0	0.358364	0	0	0	0	0	0	0	0
GO_ANCHORING_JUNCTION	0	0	0	0	0	0	0	0	0	0	0	0	0	0	0
BRUINS_UVC_RESPONSE_VIA_TP53_GROUP_B	0	0	0	0	0	0	0	0	0	0	0	0	0	0	0
MODULE_23	0	0	0	0	0	0	0	0	0	0	0	0	0	0	0
PARENT_MTOR_SIGNALING_UP	0	0	0	0	0	0	0	0	0	0	0	0	0	0	0
GO_PROTEIN_CATABOLIC_PROCESS	0	0	0	0	0	0	0	0	0	0	0	0	0	0	0
GGGYGTGNY_UNKNOWN	0	0	0	0	0	0	0	0	0	0	0	0	0	0	0
MODULE_117	0	0	0	0	0	0	0	0	0	0	0	0	0	0	0
CUI_TCF21_TARGETS_2_DN	0	0	0	0	0	0	0	0	0	0	0	0	2.41394	0	0
GO_CYTOSKELETAL_PROTEIN_BINDING	0	0	0	0	0	0	0	0	0	0	0	0	0	0	0
RCGCANGCGY_V$NRF1_Q6	0	0	0	0	0	0	0	0	0	0	0	0	0	0	0
GO_CHROMOSOME_ORGANIZATION	0	0	0	0	0	0	0	0	0	0	0	0	0	0	0
GO_MEMBRANE_PROTEIN_COMPLEX	0	0	0	0	0	0	0	0	0	0	0	0	0	0	0
ZWANG_CLASS_3_TRANSIENTLY_INDUCED_BY_EGF	0	0	0	0	0	0	6.67855	0	0	0	0	0	0	0	0
OSWALD_HEMATOPOIETIC_STEM_CELL_IN_COLLAGEN_GEL_UP	0	0	0	0	0	0	6.19834	0	0	0	0	1.65529	0	0	0
STK33_SKM_UP	0	0	0	0	0	0	5.13458	0	0	0	0	1.86173	0	0	0
PHONG_TNF_RESPONSE_NOT_VIA_P38	0	0	0	0	0	0	2.25266	0	0	0	0	0	0	0	0
GO_RESPONSE_TO_INORGANIC_SUBSTANCE	0	0	0	0	0	0	0	0	0	0	0	1.87179	0	0	0
GO_REGULATION_OF_BODY_FLUID_LEVELS	0	0	0	0	0	0	0	0	0	0	0	0	0	0	0
RGAGGAARY_V$PU1_Q6	0	0	0	0	0	0	0	0	0	0	0	0	0	0	0
GRAESSMANN_APOPTOSIS_BY_SERUM_DEPRIVATION_UP	0	0	0	0	0	0	0	0	0	0	0	0	0	0	0
GO_VACUOLAR_MEMBRANE	0	0	0	0	0	0	0	0	0	0	0	0.379911	0	0	0
GO_TISSUE_MORPHOGENESIS	0	0	0	0	0	0	0	0	0	0	0	0	0	0	0
GO_POSITIVE_REGULATION_OF_ORGANELLE_ORGANIZATION	0	0	0	0	0	0	0	0	0	0	0	0	0	0	0
GO_DEVELOPMENTAL_PROCESS_INVOLVED_IN_REPRODUCTION	0	0	0	0	0	0	0	0	0	0	0	0	0	0	0
CAIRO_HEPATOBLASTOMA_CLASSES_UP	0	0	0	0	0	0	0	0	0	0	0	0	0	0	0
GO_RNA_POLYMERASE_II_TRANSCRIPTION_FACTOR_ACTIVITY_SEQUENCE_SPECIFIC_DNA_BINDING	0	0	0	0	0	0	0	0	0	0	0	0	0	0	0
GO_CARBOHYDRATE_METABOLIC_PROCESS	0	0	0	0	0	0	0	0	0	0	0	0	2.23397	0	0
GO_HYDROLASE_ACTIVITY_ACTING_ON_ESTER_BONDS	0	0	0	0	0	0	0	0	0	0	0	0	0	0	0
GO_TRANSFERASE_COMPLEX	0	0	0	0	0	0	0	0	0	0	0	0	0	0	0
GRAESSMANN_RESPONSE_TO_MC_AND_DOXORUBICIN_DN	0	0	0	0	0	0	0	0	0	0	0	0	0	0	0
GO_INTRACELLULAR_PROTEIN_TRANSPORT	0	0	0	0	0	0	0	0	0	0	0	0	0	0	0
GO_CHEMICAL_HOMEOSTASIS	0	0	0	0	0	0	0	0	0	0	0	0	0	0	0
NUYTTEN_EZH2_TARGETS_DN	0	0	0	0	0	0	0	0	0	0	0	0	0	0	0
GO_TRANSMEMBRANE_TRANSPORTER_ACTIVITY	0	0	0.768031	0	0	0	0	1.14526	0	0	0	0	0	0	0
GO_MICROTUBULE_CYTOSKELETON	0	0	0	0	0	0	0	0	0	0	0	0	0	0	0
GO_CELL_CYCLE_PROCESS	0	0	0	0	0	0	0	0	0	0	0	0	0	0	0
GSE21360_NAIVE_VS_PRIMARY_MEMORY_CD8_TCELL_DN	0	0	0	0	0	0	7.64266	0	0	0	0	0.358126	0	0	0
GSE19401_NAIVE_VS_IMMUNIZED_MOUSE_PLN_FOLLICULAR_DC_UP	0	0	0	0	0	0	7.20183	0	0	0	0	6.05249	0	0	0
GSE22140_HEALTHY_VS_ARTHRITIC_GERMFREE_MOUSE_CD4_TCELL_DN	0	0	0	0	0	0	7.14075	0	0	0	0	4.18198	0	0	0
GSE19923_WT_VS_HEB_AND_E2A_KO_DP_THYMOCYTE_DN	0	0	0	0	0	0	7.08017	0	0	0	0	5.97092	0	0	0
GSE27670_BLIMP1_VS_LMP1_TRANSDUCED_GC_BCELL_UP	0	0	0	0	0	0	6.61093	0	0	0	0	0	0	0	0
JIANG_HYPOXIA_NORMAL	0	0	0	0	0	0	2.64934	0	0	0	0	0.833612	0	0	0
PASINI_SUZ12_TARGETS_DN	0	0	0	0	0	0	2.17977	0	0	0	0	0	0	0	0
MODULE_15	0	0	0	0	0	0	1.44693	0	0	0	0	0	0	0	0
GO_NEGATIVE_REGULATION_OF_TRANSFERASE_ACTIVITY	0	0	0	0	0	0	1.29097	0	0	0	0	0	0	0	0
DELACROIX_RARG_BOUND_MEF	0	0	0	0	0	0	1.06537	0	0	0	0	1.73004	0	0	0
RUTELLA_RESPONSE_TO_HGF_VS_CSF2RB_AND_IL4_UP	0	0	0	0	0	0	0.642998	0	0	0	0	0	0	0	0
THUM_SYSTOLIC_HEART_FAILURE_UP	0	0	0	0	0	0	0.620691	0	0	0	0	0	2.64081	0	0
MODULE_118	0	0	0	0	0	0	0.014529	0	0	0	0	0	0	0	0
GO_NEGATIVE_REGULATION_OF_PHOSPHORYLATION	0	0	0	0	0	0	0	0	0	0	0	0	0	0	0
TCANNTGAY_V$SREBP1_01	0	0	0	0	0	0	0	0	0	0	0	0	0	0	0
GO_CELLULAR_RESPONSE_TO_LIPID	0	0	0	0	0	0	0	0	0	0	0	0.316235	0	0	0
REACTOME_ADAPTIVE_IMMUNE_SYSTEM	0	0	0	0	0	0	0	0	0	0	0	0	0	0	0
MODULE_13	0	0	0	0	0	0	0	0	0	0	0	0	0	0	0
BERENJENO_TRANSFORMED_BY_RHOA_UP	0	0	0	0	0	0	0	0	0	0	0	0	0	0	0
GO_POSITIVE_REGULATION_OF_TRANSFERASE_ACTIVITY	0	0	0	0	0	0	0	0	0	0	0	0	0	0	0
GO_NEGATIVE_REGULATION_OF_CELL_PROLIFERATION	0	0	0	0	0	0	0	0.537208	0	0	0	0.0268995	0	0	0
GO_NUCLEOPLASM_PART	0	0	0	0	0	0	0	0	0	0	0	0	0	0	0
MARTENS_TRETINOIN_RESPONSE_DN	0	0	0	0	0	0	0	0	0	0	0	0	0	0	0
CAGGTA_V$AREB6_01	0	0	0	0	0	0	0	0	0	0	0	0	0	0	0
GO_HYDROLASE_ACTIVITY_ACTING_ON_ACID_ANHYDRIDES	0	0	0	0	0	0	0	0	0	0	0	0	0	0	0
TGACAGNY_V$MEIS1_01	0	0	0	0	0	0	0	0	0	0	0	0	0	0	0
GO_CELL_PROJECTION_ORGANIZATION	0	0	0	0	0	0	0	0	0	0	0	0	0	0	0
GO_NEURON_PART	0	0	0	0	0	0	0	0	0	0	0	0	0.683801	0	0
GSE34156_TLR1_TLR2_LIGAND_VS_NOD2_AND_TLR1_TLR2_LIGAND_24H_TREATED_MONOCYTE_UP	0	0	0	0	0	0	7.10738	0	0	0	0	4.62495	0	0	0
GSE10325_LUPUS_CD4_TCELL_VS_LUPUS_MYELOID_DN	0	0	0	0	0	0	7.04406	0	0	0	0	3.68625	0	0	0
GSE21360_TERTIARY_VS_QUATERNARY_MEMORY_CD8_TCELL_UP	0	0	0	0	0	0	6.91886	0	0	0	0	5.43594	0	0	0
GSE22886_NAIVE_CD8_TCELL_VS_MONOCYTE_DN	0	0	0	0	0	0	6.67427	0	0	0	0	4.36198	0	0	0
GSE22886_NAIVE_BCELL_VS_MONOCYTE_DN	0	0	0	0	0	0	6.61433	0	0	0	0	1.00349	0	0	0
GSE3337_4H_VS_16H_IFNG_IN_CD8POS_DC_DN	0	0	0	0	0	0	6.61433	0	0	0	0	2.5958	0	0	0
GSE34392_ST2_KO_VS_WT_DAY8_LCMV_EFFECTOR_CD8_TCELL_DN	0	0	0	0	0	0	6.15032	0	0	0	0	0.0892124	0	0	0
GSE29164_UNTREATED_VS_CD8_TCELL_TREATED_MELANOMA_DAY7_UP	0	0	0	0	0	0	5.8198	0	0	0	0	0	0	0	0
GSE26343_UNSTIM_VS_LPS_STIM_NFAT5_KO_MACROPHAGE_DN	0	0	0	0	0	0	5.8198	0	0	0	0	0	0	0	0
HOSHIDA_LIVER_CANCER_SUBCLASS_S1	0	0	0	0	0	0	4.40274	0	0	0	0.30194	0	0	0	0
QI_PLASMACYTOMA_UP	0	0	0	0	0	0	3.45332	0	0	0	0	2.35954	0	0	0
LI_INDUCED_T_TO_NATURAL_KILLER_UP	0	0	0	0	0	0	2.36209	0	0	0	0	0.984265	0	0	0
SANSOM_APC_TARGETS_DN	0	0	0	0	0	0	0.826892	0	0	0	0	1.25513	0	0	0
MODULE_12	0	0	0	0	0	0	0.614555	3.66215	0	0	0	0	4.49486	0	0
RUTELLA_RESPONSE_TO_HGF_UP	0	0	0	0	0	0	0.0110669	0	0	0	0	0	0.55419	0	0
GO_MORPHOGENESIS_OF_AN_EPITHELIUM	0	0	0	0	0	0	0	0	0	0	0	0	0	0	0
GO_NEGATIVE_REGULATION_OF_INTRACELLULAR_SIGNAL_TRANSDUCTION	0	0	0	0	0	0	0	0	0	0	0	0	0	0	0
GO_TAXIS	0	0	0	0	0	0	0	0	0	0	0	0.6061	0	0	0
ONDER_CDH1_TARGETS_2_DN	0	0	0	0	0	0	0	0	0	0	0	0	0	0	0
CHARAFE_BREAST_CANCER_LUMINAL_VS_MESENCHYMAL_DN	0	0	0	0	0	0	0	0	0	0	0	0	0	0	0
GO_MONOCARBOXYLIC_ACID_METABOLIC_PROCESS	0	0	0.832282	0	0	0	0	0.896276	0	0	0	0	2.84096	0	0
GO_CELLULAR_RESPONSE_TO_ORGANIC_CYCLIC_COMPOUND	0	0	0	0	0	0	0	0	0	0	0	0	0	0	0
GO_ENDOCYTOSIS	0	0	0	0	0	0	0	0	0	0	0	1.33056	0	0	0
MATSUDA_NATURAL_KILLER_DIFFERENTIATION	0	0	0	0	0	0	0	0	0	0	0	0	0	0	0
GO_LYTIC_VACUOLE	0	0	0	0	0	0	0	0	0	0	0	2.11705	0	0	0
TGCTGAY_UNKNOWN	0	0	0	0	0	0	0	0	0	0	0	0	0	0	0
GO_CYTOPLASMIC_VESICLE_PART	0	0	0	0	0	0	0	0	0	0	0	0	0	0	0
GO_PROTEIN_DOMAIN_SPECIFIC_BINDING	0	0	0	0	0	0	0	0	0	0	0	0	0	0	0
GO_PROTEIN_UBIQUITINATION	0	0	0	0	0	0	0	0	0	0	0	0	0	0	0
WAKABAYASHI_ADIPOGENESIS_PPARG_BOUND_8D	0	0	0	0	0	0	0	0	0	0	0	0	0	0	0
GO_PROTEIN_KINASE_ACTIVITY	0	0	0	0	0	0	0	0	0	0	0	0	0	0	0
GOZGIT_ESR1_TARGETS_DN	0	0	0	0	0	0	0	0	0	0	0	0	0	0	0
PATIL_LIVER_CANCER	0	0	0	0	0	0	0	0	0	0	0	0	0	0	0
GO_DNA_METABOLIC_PROCESS	0	0	0	0	0	0	0	0	0	0	0	0	0	0	0
NUYTTEN_NIPP1_TARGETS_DN	0	0	0	0	0	0	0	0	0	0	0	0	0	0	0
GO_NEURON_DIFFERENTIATION	0	0	0	0	0	0	0	0	0	0	0	0	0	0	0
GO_SINGLE_ORGANISM_CELLULAR_LOCALIZATION	0	0	0	0	0	0	0	0.0598816	0	0	0	0	0	0	0
VERHAAK_AML_WITH_NPM1_MUTATED_UP	0	0	0	0	0	0	6.63748	0	0	0	0	3.01746	0	0	0
GSE9988_LOW_LPS_VS_VEHICLE_TREATED_MONOCYTE_UP	0	0	0	0	0	0	6.63748	0	0	0	0	0	0	0	0
GSE9988_LOW_LPS_VS_CTRL_TREATED_MONOCYTE_UP	0	0	0	0	0	0	6.51259	0	0	0	0	0	0	0	0
GSE42021_TCONV_PLN_VS_TREG_PRECURSORS_THYMUS_DN	0	0	0	0	0	0	5.15583	0	0	0	0	0	0	0	0
GSE27434_WT_VS_DNMT1_KO_TREG_DN	0	0	0	0	0	0	5.05348	0	0	0	0	1.37935	0	0	0
GO_EXTRACELLULAR_STRUCTURE_ORGANIZATION	0	0	0	0	0	0	1.33338	0	0	0	0	0	0	0	0
SCHUETZ_BREAST_CANCER_DUCTAL_INVASIVE_UP	0	0	0	0	0	0	1.0116	0	0	0	0	0	0	0	0
GO_REGULATION_OF_INNATE_IMMUNE_RESPONSE	0	0	0	0	0	0	0.56592	0	0	0	0	1.39992	0	0	0
GO_POSITIVE_REGULATION_OF_DEFENSE_RESPONSE	0	0	0	0	0	0	0.518987	0	0	0	0	2.01653	0	0	0
GO_BLOOD_VESSEL_MORPHOGENESIS	0	0	0	0	0	0	0.0744118	0	0	0	0	0.415805	0	0	0
chr19p13	0	0.145615	0	0	0	0	0	0	0	0	0	0	0	0	0
GO_RESPONSE_TO_PEPTIDE	0	0	0	0	0	0	0	0	0	0	0	0	0	0	0
CHARAFE_BREAST_CANCER_LUMINAL_VS_MESENCHYMAL_UP	0	0	0	0	0	0	0	0	0	0	0	0	0	0	0
GO_EXTRACELLULAR_MATRIX	0	0	0	0	0	0	0	0	0	0	0	0.781764	0	0	0
DELACROIX_RAR_BOUND_ES	0	0	0	0	0	0	0	0	0	0	0	0	0	0	0
MODULE_18	0	0	0	0	0	0	0	0	0	0	0	0	0	0	0
SENESE_HDAC3_TARGETS_UP	0	0	0	0	0	0	0	0	0	0	0	0	0	0	0
DUTERTRE_ESTRADIOL_RESPONSE_24HR_DN	0	0	0	0	0	0	0	0	0	0	0	0	0	0	0
GO_RESPONSE_TO_GROWTH_FACTOR	0	0	0	0	0	0	0	0	0	0	0	0.994995	0	0	0
GO_EPITHELIAL_CELL_DIFFERENTIATION	0	0	0	0	0	0	0	1.45556	0	0	0	0	0	0	0
GO_SENSORY_ORGAN_DEVELOPMENT	0	0	0	0	0	0	0	0	0	0	0	0.225646	0	0	0
MEISSNER_NPC_HCP_WITH_H3_UNMETHYLATED	0	0	0	0	0	0	0	0	0	0	0	0	0	0	0
MARTINEZ_RB1_TARGETS_DN	0	0	0	0	0	0	0	0	0	0	0	0	0.673638	0	0
MASSARWEH_TAMOXIFEN_RESISTANCE_UP	0	0	0	0	0	0	0	0	0	0	0	0	0	0	0
GO_EMBRYO_DEVELOPMENT_ENDING_IN_BIRTH_OR_EGG_HATCHING	0	0	0	0	0	0	0	0	0	0	0	0	0	0	0
GO_TRANSCRIPTION_FACTOR_ACTIVITY_PROTEIN_BINDING	0	0	0	0	0	0	0	0	0	0	0	0	0	0	0
SPIELMAN_LYMPHOBLAST_EUROPEAN_VS_ASIAN_DN	0	0	0	0	0	0	0	0	0	0	0	0	0	0	0
GO_REGULATION_OF_INTRACELLULAR_TRANSPORT	0	0	0	0	0	0	0	0	0	0	0	0	0	0	0
GO_KINASE_BINDING	0	0	0	0	0	0	0	0	0	0	0	0	0	0	0
SMID_BREAST_CANCER_BASAL_DN	0	0	0	0	0	0	0	0	0	0	0	0	0	0	0
GO_CELLULAR_RESPONSE_TO_DNA_DAMAGE_STIMULUS	0	0	0	0	0	0	0	0	0	0	0	0	0	0	0
GO_MULTICELLULAR_ORGANISM_REPRODUCTION	0	0	0	0	0	0	0	0	0	0	0	0	0	0	0
GO_STRUCTURAL_MOLECULE_ACTIVITY	0	0	0	0	0	0	0	0	0	0	0	0	0	0	0
GEORGES_TARGETS_OF_MIR192_AND_MIR215	0	0	0	0	0	0	0	0	0	0	0	0	0.369878	0	0
GO_CYTOSKELETON_ORGANIZATION	0	0	0	0	0	0	0	0	0	0	0	0	0	0	0
GO_MEMBRANE_ORGANIZATION	0	0	0	0	0	0	0	0	0	0	0	0	0	0	0
GO_MITOCHONDRIAL_PART	0	0	1.22525	0	0	0	0	7.35626	0	0	0	0	1.79377	0	0
GO_PLASMA_MEMBRANE_REGION	0	0	0	0	0	0	0	0	0	0	0	0	0.351089	0	0
BENPORATH_SUZ12_TARGETS	0	0	0	0	0	0	0	0	0	0	0	0	1.68333	0	0
GSE9988_LPS_VS_VEHICLE_TREATED_MONOCYTE_UP	0	0	0	0	0	0	6.04473	0	0	0	0	0	0	0	0
GSE24634_TREG_VS_TCONV_POST_DAY10_IL4_CONVERSION_DN	0	0	0	0	0	0	4.965	0	0	0	0	0.928056	0	0	0
GSE28737_BCL6_HET_VS_BCL6_KO_FOLLICULAR_BCELL_DN	0	0	0	0	0	0	4.965	0	0	0	0	0.928056	0	0	0
GSE46606_UNSTIM_VS_CD40L_IL2_IL5_1DAY_STIMULATED_IRF4HIGH_SORTED_BCELL_DN	0	0	0	0	0	0	4.91252	0	0	0	0	0.903235	0	0	0
HALLMARK_EPITHELIAL_MESENCHYMAL_TRANSITION	0	0	0	0	0	0	4.36015	0	0	0	0	1.37935	0	0	0
MCLACHLAN_DENTAL_CARIES_UP	0	0	0	0	0	0	4.21709	0	0	0	0	0.572451	0	0	0
GSE22935_WT_VS_MYD88_KO_MACROPHAGE_UP	0	0	0	0	0	0	4.21709	0	0	0	0	0	0	0	0
RICKMAN_METASTASIS_DN	0	0	0	0	0	0	2.74926	0	0	0	0	0	0	0	0
DANG_REGULATED_BY_MYC_DN	0	0	0	0	0	0	2.31805	0	0	0	0	4.75096	0	0	0
GO_REGULATION_OF_INFLAMMATORY_RESPONSE	0	0	0	0	0	0	1.82192	0	0	0	0	0	0	0	0
PENG_GLUTAMINE_DEPRIVATION_DN	0	0	0	0	0	0	0.238495	0	0	0	0	0	0	0	0
DAIRKEE_TERT_TARGETS_UP	0	0	0	0	0	0	0.215703	0	0	0	0	0	0	0	0
GO_NEGATIVE_REGULATION_OF_IMMUNE_SYSTEM_PROCESS	0	0	0	0	0	0	0.170876	0	0	0	0	0	0	0	0
YAGI_AML_WITH_T_8_21_TRANSLOCATION	0	0	0	0	0	0	0.0604176	0	0	0	0	0	0	0	0
GRUETZMANN_PANCREATIC_CANCER_UP	0	0	0	0	0	0	0	0	0	0	0	0	0	0	0
ZHOU_INFLAMMATORY_RESPONSE_LPS_UP	0	0	0	0	0	0	0	0	0	0	0	0	0	0	0
CHYLA_CBFA2T3_TARGETS_UP	0	0	0	0	0	0	0	0	0	0	0	0	0	0	0
HSIAO_HOUSEKEEPING_GENES	0	0	0	0	0	0	0	3.8551	0	0	0	0	0	0	0
VECCHI_GASTRIC_CANCER_EARLY_UP	0	0	0	0	0	0	0	0	0	0	0	0	0	0	0
GO_POSITIVE_REGULATION_OF_CELLULAR_COMPONENT_BIOGENESIS	0	0	0	0	0	0	0	0	0	0	0	0	0	0	0
GO_NUCLEAR_ENVELOPE	0	0	0	0	0	0	0	0	0	0	0	0	0	0	0
BOCHKIS_FOXA2_TARGETS	0	0	0	0	0	0	0	0	0	0	0	0	0	0	0
GO_GROWTH	0	0	0	0	0	0	0	0	0	0	0	0	0	0	0
GO_CELL_SUBSTRATE_JUNCTION	0	0	0	0	0	0.0125006	0	0	0	0	0	0	0	0	0
SMID_BREAST_CANCER_NORMAL_LIKE_UP	0	0	0	0	0	0	0	0	0	0	0	0.12805	0	0	0
GO_POSITIVE_REGULATION_OF_ESTABLISHMENT_OF_PROTEIN_LOCALIZATION	0	0	0	0	0	0	0	0	0	0	0	0.559083	0	0	0
IVANOVA_HEMATOPOIESIS_EARLY_PROGENITOR	0	0	0	0	0	0	0	0	0	0	0	0	0	0	0
MEISSNER_NPC_HCP_WITH_H3K4ME2	0	0	0	0	0	0	0	0	0	0	0	0	0	0	0
GO_AMIDE_BIOSYNTHETIC_PROCESS	0	0	0	0	0	0	0	0	0	0	0	0	0	0	0
CHICAS_RB1_TARGETS_CONFLUENT	0	0	0	0	0	0	0	0	0	0	0	0	0	0	0
REACTOME_SIGNALING_BY_GPCR	0	0	0	0	0	0	0	0	0	0	0	0	0	0	0
TGTTTGY_V$HNF3_Q6	0	0	0	0	0	0	0	0	0	0	0	0	0	0	0
WEI_MYCN_TARGETS_WITH_E_BOX	0	0	0	0	0	0	0	0	0	0	0	0	0	0	0
GO_MITOTIC_CELL_CYCLE	0	0	0	0	0	0	0	0	0	0	0	0	0	0	0
GO_NEUROLOGICAL_SYSTEM_PROCESS	0	0	0	0	0	0	0	0	0	0	0	0	0	0	0
GO_MULTI_ORGANISM_REPRODUCTIVE_PROCESS	0	0	0	0	0	0	0	0	0	0	0	0	0	0	0
BENPORATH_ES_WITH_H3K27ME3	0	0	0	0	0	0	0	0	0	0	0	0	0	0	0
KINSEY_TARGETS_OF_EWSR1_FLII_FUSION_UP	0	0	0	0	0	0	0	0	0	0	0	0	0	0	0
GSE6259_FLT3L_INDUCED_DEC205_POS_DC_VS_CD8_TCELL_DN	0	0	0	0	0	0	5.33957	0	0	0	0	0	0	0	0
GSE2706_UNSTIM_VS_2H_R848_DC_DN	0	0	0	0	0	0	5.28124	0	0	0	0	0	0	0	0
GSE22886_CTRL_VS_LPS_24H_DC_DN	0	0	0	0	0	0	4.8864	0	0	0	0	0	0	0	0
GSE29618_MONOCYTE_VS_PDC_UP	0	0	0	0	0	0	4.8318	0	0	0	0	3.72172	0	0	0
GSE21360_PRIMARY_VS_TERTIARY_MEMORY_CD8_TCELL_DN	0	0	0	0	0	0	4.61771	0	0	0	0	1.10708	0	0	0
GSE29618_MONOCYTE_VS_MDC_DAY7_FLU_VACCINE_UP	0	0	0	0	0	0	4.56525	0	0	0	0	1.86677	0	0	0
GSE14769_UNSTIM_VS_60MIN_LPS_BMDM_DN	0	0	0	0	0	0	4.35952	0	0	0	0	1.75321	0	0	0
GSE22886_NAIVE_TCELL_VS_MONOCYTE_DN	0	0	0	0	0	0	4.25898	0	0	0	0	3.34478	0	0	0
GSE369_PRE_VS_POST_IL6_INJECTION_SOCS3_KO_LIVER_DN	0	0	0	0	0	0	4.16006	0	0	0	0	2.44376	0	0	0
GSE7831_CPG_VS_INFLUENZA_STIM_PDC_1H_DN	0	0	0	0	0	0	4.01439	0	0	0	0	0	0	0	0
GSE45365_NK_CELL_VS_BCELL_UP	0	0	0	0	0	0	4.01439	0	0	0	0	0	0	0	0
STK33_NOMO_UP	0	0	0	0	0	0	1.41406	0	0	0	0	0.0879243	0	0	0
RUTELLA_RESPONSE_TO_CSF2RB_AND_IL4_DN	0	0	0	0	0	0	0.922372	0	0	0	0	0	0	0	0
ZHANG_TLX_TARGETS_60HR_UP	0	0	0	0	0	0	0.894996	0	0	0	0	2.42824	0	0	0
LEI_MYB_TARGETS	0	0	0	0	0	0	0.477657	0	0	0	0	0	0	0	0
MODULE_220	0	0	0	0	0	0	0	0	0	0	0	0	0	0	0
TARTE_PLASMA_CELL_VS_PLASMABLAST_UP	0	0	0	0	0	0	0	0	0	0	0	1.47414	0	0	0
GO_RESPONSE_TO_OXIDATIVE_STRESS	0	0	0	0	0	0	0	0	0	0	0	0	0	0	0
HAN_SATB1_TARGETS_UP	0	0	0	0	0	0	0	0	0	0	0	0	0	0	0
GO_RESPONSE_TO_ALCOHOL	0	0	0	0	0	0	0	0	0	0	0	0.415805	0	0	0
SATO_SILENCED_BY_METHYLATION_IN_PANCREATIC_CANCER_1	0	0	0	0	0	0	0	0	0	0	0	0	0	0	0
KUMAR_TARGETS_OF_MLL_AF9_FUSION	0	0	0	0	0	0	0	0	0	0	0	0	0	0	0
GO_GLAND_DEVELOPMENT	0	0	0	0	0	0	0	0	0	0	0	0	0	0	0
GO_SMALL_MOLECULE_BIOSYNTHETIC_PROCESS	0	0	0	0	0	0	0	0	0	0	0	0	1.93025	0	0
GO_ACTIN_CYTOSKELETON	0	0	0	0	0	0	0	0	0	0	0	0	0	0	0
GO_POSITIVE_REGULATION_OF_MAPK_CASCADE	0	0	0	0	0	0	0	0	0	0	0	0.410333	0	0	0
GO_REGULATION_OF_PROTEIN_SERINE_THREONINE_KINASE_ACTIVITY	0	0	0	0	0	0	0	0	0	0	0	0.737018	0	0	0
ACEVEDO_LIVER_CANCER_DN	0	0	0	0	0	0	0	0	0	0	0	0	0	0	0
GO_CELLULAR_COMPONENT_DISASSEMBLY	0	0	0	0	0	0	0	0	0	0	0	0	0	0	0
GO_NCRNA_METABOLIC_PROCESS	0	0	0	0	0	0	0	0	0	0	0	0	0	0	0
GO_PEPTIDE_METABOLIC_PROCESS	0	0	0	0	0	0	0	0.235901	0	0	0	0	0	0	0
GO_EMBRYONIC_MORPHOGENESIS	0	0	0	0	0	0	0	0	0	0	0	0	0	0	0
BENPORATH_CYCLING_GENES	0	0	0	0	0	0	0	0	0	0	0	0	0	0	0
GO_PERINUCLEAR_REGION_OF_CYTOPLASM	0	0	0	0	0	0	0	0.0604934	0	0	0	0	0	0	0
GO_REGULATION_OF_GROWTH	0	0	0	0	0	0	0	0	0	0	0	0	0	0	0
YTATTTTNR_V$MEF2_02	0	0	0	0	0	0	0	0	0	0	0	0	0	0	0
MARSON_BOUND_BY_E2F4_UNSTIMULATED	0	0	0	0	0	0	0	0	0	0	0	0	0	0	0
GO_NEGATIVE_REGULATION_OF_CELLULAR_COMPONENT_ORGANIZATION	0	0	0	0	0	0	0	0	0	0	0	0	0	0	0
NUYTTEN_NIPP1_TARGETS_UP	0	0	0	0	0	0	0	0	0	0	0	0	0	0	0
CTGCAGY_UNKNOWN	0	0	0	0	0	0	0	0	0	0	0	0	0	0	0
KIM_ALL_DISORDERS_OLIGODENDROCYTE_NUMBER_CORR_UP	0	0	3.35365	0	0	0	0	5.32947	0	0	1.95955	0	0	0	0
GO_REGULATION_OF_CELL_DEVELOPMENT	0	0	0	0	0	0	0	0	0	0	0	0	0	0	0
GSE36891_POLYIC_TLR3_VS_PAM_TLR2_STIM_PERITONEAL_MACROPHAGE_UP	0	0	0	0	0	0	5.67377	0	0	0	0	2.02827	0	0	0
GSE27241_CTRL_VS_DIGOXIN_TREATED_CD4_TCELL_IN_TH17_POLARIZING_CONDITIONS_UP	0	0	0	0	0	0	5.11231	0	0	0	0	0	0	0	0
GSE2706_UNSTIM_VS_2H_LPS_DC_DN	0	0	0	0	0	0	4.70594	0	0	0	0	0	0	0	0
GSE34156_NOD2_LIGAND_VS_TLR1_TLR2_LIGAND_6H_TREATED_MONOCYTE_DN	0	0	0	0	0	0	4.48455	0	0	0	0	3.97753	0	0	0
GSE9988_ANTI_TREM1_VS_LOW_LPS_MONOCYTE_DN	0	0	0	0	0	0	4.2181	0	0	0	0	0	0	0	0
GSE6259_33D1_POS_DC_VS_CD4_TCELL_DN	0	0	0	0	0	0	4.11461	0	0	0	0	4.62495	0	0	0
GSE16266_CTRL_VS_LPS_STIM_MEF_UP	0	0	0	0	0	0	4.01278	0	0	0	0	1.15999	0	0	0
GSE25123_IL4_VS_IL4_AND_ROSIGLITAZONE_STIM_PPARG_KO_MACROPHAGE_DAY10_DN	0	0	0	0	0	0	4.01278	0	0	0	0	0	0	0	0
GSE2128_CTRL_VS_MIMETOPE_NEGATIVE_SELECTION_DP_THYMOCYTE_NOD_UP	0	0	0	0	0	0	3.96247	0	0	0	0	0.381764	0	0	0
GSE22886_DAY0_VS_DAY1_MONOCYTE_IN_CULTURE_UP	0	0	0	0	0	0	3.91254	0	0	0	0	0	0	0	0
TGFB_UP.V1_UP	0	0	0	0	0	0	3.86308	0	0	0	0	0	0	0	0
GSE24634_TEFF_VS_TCONV_DAY7_IN_CULTURE_DN	0	0	0	0	0	0	3.86308	0	0	0	0	2.68959	0	0	0
GSE8515_CTRL_VS_IL1_4H_STIM_MAC_DN	0	0	0	0	0	0	3.86308	0	0	0	0	0	0	0	0
GSE10239_NAIVE_VS_KLRG1INT_EFF_CD8_TCELL_UP	0	0	0	0	0	0	3.81407	0	0	0	0	0	0	0	0
GSE42088_2H_VS_24H_LEISHMANIA_INF_DC_UP	0	0	0	0	0	0	3.76539	0	0	0	0	2.62684	0	0	0
GSE17721_LPS_VS_POLYIC_1H_BMDC_UP	0	0	0	0	0	0	3.66905	0	0	0	0	0	0	0	0
GSE19401_PAM2CSK4_VS_RETINOIC_ACID_AND_PAM2CSK4_STIM_FOLLICULAR_DC_DN	0	0	0	0	0	0	3.66905	0	0	0	0	0	0	0	0
GSE9006_TYPE_1_DIABETES_AT_DX_VS_4MONTH_POST_DX_PBMC_UP	0	0	0	0	0	0	3.62145	0	0	0	0	3.37781	0	0	0
GSE41176_WT_VS_TAK1_KO_ANTI_IGM_STIM_BCELL_24H_UP	0	0	0.921314	0	0	0	3.48088	0	0	0	0	2.44376	0	0	0
GSE25085_FETAL_BM_VS_ADULT_BM_SP4_THYMIC_IMPLANT_DN	0	0	0	0	0	0	3.38895	0	0	0	0	0	0	0	0
GSE9988_ANTI_TREM1_AND_LPS_VS_VEHICLE_TREATED_MONOCYTES_DN	0	0	0	0	0	0	3.34355	0	0	0	0	0	0	0	0
GSE26912_TUMORICIDAL_VS_CTRL_MACROPHAGE_DN	0	0	0	0	0	0	3.1653	0	0	0	0	0	0	0	0
GSE42021_TREG_PLN_VS_CD24HI_TREG_THYMUS_UP	0	0	0	0	0	0	2.94973	0	0	0	0	0	0	0	0
GO_REGULATION_OF_VASCULATURE_DEVELOPMENT	0	0	0	0	0	0	2.16106	0	0	0	0	0	0	0	0
GO_NEGATIVE_REGULATION_OF_RESPONSE_TO_EXTERNAL_STIMULUS	0	0	0	0	0	0	0.927228	0	0	0	0	0	0	0	0
HORIUCHI_WTAP_TARGETS_UP	0	0	0	0	0	0	0.676018	0	0	0	0	2.66397	0	0	0
DEURIG_T_CELL_PROLYMPHOCYTIC_LEUKEMIA_UP	0	0	0	0	0	0	0	0	0	0	0	0	0	0	0
GO_REGULATION_OF_CELL_CELL_ADHESION	0	0	0	0	0	0	0	0	0	0	0	3.33406	0	0	0
GO_REGULATION_OF_PEPTIDASE_ACTIVITY	0	0	0	0	0	0	0	0	0	0	0	0	0	0	0
BLALOCK_ALZHEIMERS_DISEASE_INCIPIENT_UP	0	0	0	0	0	0	0	0	0	0	0	0	0	0	0
MODULE_33	0	0	0	0	0	0	0	0	0	0	0	0	0	0	0
GO_DEFENSE_RESPONSE_TO_OTHER_ORGANISM	0	0	0	0	0	0	0	0	0	0	0	1.96842	0	0	0
MITSIADES_RESPONSE_TO_APLIDIN_UP	0	0	0	0	0	0	0	0	0	0	0	0.120427	0	0	0
GO_REGULATION_OF_IMMUNE_EFFECTOR_PROCESS	0	0	0	0	0	0	0	0	0	0	0	1.23857	0	0	0
MODULE_53	0	0	0	0	0	0	0	0	0	0	0	0.0222575	0	0	0
YAGI_AML_WITH_INV_16_TRANSLOCATION	0	0	0	0	0	0	0	0	0	0	0	0	0	0	0
HAN_SATB1_TARGETS_DN	0	0	0	0	0	0	0	0	0	0	0	0	0	0	0
CHARAFE_BREAST_CANCER_LUMINAL_VS_BASAL_DN	0	0	0	0	0	0	0	0	0	0	0	0	0	0	0
GO_REGULATION_OF_ANATOMICAL_STRUCTURE_SIZE	0	0	0	0	0	0	0	0	0	0	0	0	0	0	0
GO_CELLULAR_RESPONSE_TO_NITROGEN_COMPOUND	0	0	0	0	0	0	0	0	0	0	0	0	0	0	0
ENK_UV_RESPONSE_EPIDERMIS_DN	0	0	0	0	0	0	0	0	0	0	0	0	2.63255	0	0
TGAYRTCA_V$ATF3_Q6	0	0	0	0	0	0	0	0	0	0	0	0	0	0	0
GO_TRANSCRIPTION_FACTOR_BINDING	0	0	0	0	0	0	0	0	0	0	0	0	0	0	0
IVANOVA_HEMATOPOIESIS_LATE_PROGENITOR	0	0	0	0	0	0	0	0	0	0	0	0	0	0	0
CHICAS_RB1_TARGETS_SENESCENT	0	0	0	0	0	0	0	0	0	0	0	0	1.20839	0	0
GO_REGULATION_OF_CELLULAR_PROTEIN_LOCALIZATION	0	0	0	0	0	0	0	0	0	0	0	0	0	0	0
GO_CELLULAR_RESPONSE_TO_HORMONE_STIMULUS	0	0	0	0	0	0	0	0	0	0	0	0	0	0	0
MARTINEZ_RB1_AND_TP53_TARGETS_UP	0	0	0	0	0	0	0	0	0	0	0	0	0	0	0
GO_PEPTIDASE_ACTIVITY	0	0	0	0	0	0	0	0	0	0	0	0	0	0	0
GO_SECRETION	0	0	0	0	0	0	0	0	0	0	0	0	0	0	0
ACEVEDO_METHYLATED_IN_LIVER_CANCER_DN	0	0	0	0	0	0	0	0	0	0	0	0	0	0	0
GO_REGULATION_OF_SECRETION	0	0	0	0	0	0	0	0	0	0	0	0.420248	0	0	0
GO_HEAD_DEVELOPMENT	0	0	0	0	0	0	0	0	0	0	0	0	1.21059	0	0
GO_CELLULAR_COMPONENT_MORPHOGENESIS	0	0	0	0	0	0	0	0	0	0	0	0	0	0	0
GSE2706_UNSTIM_VS_2H_LPS_AND_R848_DC_DN	0	0	0	0	0	0	4.08324	0	0	0	0	0.031084	0	0	0
GSE7348_UNSTIM_VS_LPS_STIM_MACROPHAGE_DN	0	0	0	0	0	0	3.87109	0	0	0	0	0	0	0	0
GSE9988_LPS_VS_CTRL_TREATED_MONOCYTE_UP	0	0	0	0	0	0	3.81931	0	0	0	0	0.653776	0	0	0
GCNP_SHH_UP_LATE.V1_DN	0	0	0	0	0	0	3.51703	0	0	0	0	0	0	0	0
GSE46606_UNSTIM_VS_CD40L_IL2_IL5_1DAY_STIMULATED_IRF4_KO_BCELL_UP	0	0	0	0	0	0	3.37149	0	0	0	0	0	0	0	0
GSE24726_WT_VS_E2-2_KO_PDC_DAY4_POST_DELETION_UP	0	0	0	0	0	0	3.22958	0	0	0	0	0	0	0	0
GSE18281_CORTICAL_VS_MEDULLARY_THYMOCYTE_UP	0	0	0	0	0	0	3.13679	0	0	0	0.955999	0.311548	0	0	0
GSE26030_TH1_VS_TH17_DAY15_POST_POLARIZATION_DN	0	0	0	0	0	0	3.04543	0	0	0	0	0	0	0	0
GSE2405_S_AUREUS_VS_A_PHAGOCYTOPHILUM_NEUTROPHIL_UP	0	0	0	0	0	0	3.00032	0	0	0	0	0	0	0	0
GSE37605_C57BL6_VS_NOD_FOXP3_FUSION_GFP_TREG_DN	0	0	0	0	0	0	3.00032	0	0	0	0	0.24317	0	0	0
GSE14769_UNSTIM_VS_80MIN_LPS_BMDM_DN	0	0	0	0	0	0	2.95556	0	0	0	0	0.220827	0	0	0
GSE16697_CD4_TCELL_VS_TFH_CD4_TCELL_UP	0	0	0	0	0	0	2.95556	0	0	0	0	0	0	0	0
GSE16385_ROSIGLITAZONE_IFNG_TNF_VS_IL4_STIM_MACROPHAGE_UP	0	0	0	0	0	0	2.95556	0	0	0	0	0	0	0	0
GSE3039_CD4_TCELL_VS_B2_BCELL_UP	0	0	0	0	0	0	2.91119	0	0	0	0	0	0	0	0
GSE35685_CD34POS_CD10NEG_CD62LPOS_VS_CD34POS_CD10POS_BONE_MARROW_DN	0	0	0	0	0	0	2.91119	0	0	0	0	0.928056	0	0	0
GSE43260_BTLA_POS_VS_NEG_INTRATUMORAL_CD8_TCELL_UP	0	0	0	0	0	0	2.86712	0	0	0	0	1.67007	0	0	0
GSE17721_CPG_VS_GARDIQUIMOD_4H_BMDC_DN	0	0	0	0	0	0	2.82347	0	0	0	0	0.154297	0	0	0
GSE8515_IL1_VS_IL6_4H_STIM_MAC_UP	0	0	0	0	0	0	2.82347	0	0	0	0	0	0	0	0
KAECH_DAY8_EFF_VS_MEMORY_CD8_TCELL_DN	0	0	0	0	0	0	2.73696	0	0	0	0	1.58853	0	0	0
GSE9650_NAIVE_VS_MEMORY_CD8_TCELL_DN	0	0	0	0	0	0	2.69421	0	0	0	0	0	0	0	0
GO_NEGATIVE_REGULATION_OF_CYTOKINE_PRODUCTION	0	0	0	0	0	0	2.60975	0	0	0	0	0.757527	0	0	0
GSE42021_CD24HI_TREG_VS_CD24HI_TCONV_THYMUS_DN	0	0	0	0	0	0	2.48542	0	0	0	0	0	0	0	0
ZHANG_RESPONSE_TO_IKK_INHIBITOR_AND_TNF_UP	0	0	0	0	0	0	2.28448	0	0	0	0	1.30377	0	0	0
GO_REGULATION_OF_I_KAPPAB_KINASE_NF_KAPPAB_SIGNALING	0	0	0	0	0	0	1.68855	0	0	0	0	0	0	0	0
V$NFKB_Q6_01	0	0	0	0	0	0	1.51599	0	0	0	0	0	0	0	0
V$ELF1_Q6	0	0	0	0	0	0	1.4486	0	0	0	0	0	0	0	0
V$NFKAPPAB65_01	0	0	0	0	0	0	1.34925	0	0	0	0	0	0	0	0
HUTTMANN_B_CLL_POOR_SURVIVAL_UP	0	0	0	0	0	0	0.971396	0	0	0	0	0	0	0	0
GO_NEGATIVE_REGULATION_OF_KINASE_ACTIVITY	0	0	0	0	0	0	0.911393	0	0	0	0	0	0	0	0
BHAT_ESR1_TARGETS_VIA_AKT1_UP	0	0	0	0	0	0	0.325599	0	0	0	0	0.0353931	0	0	0
GO_LEUKOCYTE_DIFFERENTIATION	0	1.04544	0	0	0	0	0.0482203	0	0	0	0	3.26423	0	0	0
DACOSTA_UV_RESPONSE_VIA_ERCC3_UP	0	0	0	0	0	0	0	0	0	0	0	2.35973	0	0	0
GO_ANGIOGENESIS	0	0	0	0	0	0	0	0	0	0	0	0.291027	0	0	0
GO_REGULATION_OF_HEMOPOIESIS	0	0	0	0	0	0	0	0	0	0	0	1.47254	0	0	0
MODULE_19	0	0	0	0	0	0	0	0	0	0	0	1.25707	3.99863	0	0
YANG_BCL3_TARGETS_UP	0	0	0	0	0	0	0	0	0	0	0	0	0	0	0
MODULE_17	0	0	0	0	0	0	0	0	0	0	0	0	0	0	0
MIKKELSEN_NPC_ICP_WITH_H3K4ME3	0	0	0	0	0	0	0	0	0	0	0	0	0	0	0
GO_REPRODUCTIVE_SYSTEM_DEVELOPMENT	0	0	0	0	0	0	0	0	0	0	0	0	0	0	0
HELLER_HDAC_TARGETS_SILENCED_BY_METHYLATION_UP	0	0	0	0	0	0	0	0	0	0	0	0	0	0	0
REACTOME_METABOLISM_OF_PROTEINS	0	0	0	0	0	0	0	0	0	0	0	0	0	0	0
MODULE_136	0	0	0	0	0	0	0	0	0	0	0	0	0	0	0
GO_SINGLE_ORGANISM_CELL_ADHESION	0	0	0	0	0	0	0	0	0	0	0	0	0	0	0
LIU_PROSTATE_CANCER_DN	0	0	0	0	0	0	0	0	0	0	0	0	3.58915	0	0
SPIELMAN_LYMPHOBLAST_EUROPEAN_VS_ASIAN_UP	0	0	0	0	0	0	0	0	0	0	0.765548	0	0	0	0
ZWANG_CLASS_1_TRANSIENTLY_INDUCED_BY_EGF	0	0	0	0	0	0	0	0	0	0	0	0	0	0	0
GO_HEART_DEVELOPMENT	0	0	0	0	0	0	0	0	0	0	0	0	0	0	0
GO_POSITIVE_REGULATION_OF_KINASE_ACTIVITY	0	0	0	0	0	0	0	0	0	0	0	0.160514	0	0	0
GO_ANION_TRANSPORT	0	0	0.522883	0	0	0	0	0	0	0	0	0	0	0	0
GO_RESPONSE_TO_STEROID_HORMONE	0	0	0	0	0	0	0	0	0	0	0	0	0	0	0
NAKAMURA_TUMOR_ZONE_PERIPHERAL_VS_CENTRAL_DN	0	0	0	0	0	0	0	0	0	0	0	0	0	0	0
GOBERT_OLIGODENDROCYTE_DIFFERENTIATION_UP	0	0	0	0	0	0	0	0	0	0	0	0	0	0	0
GO_REGULATION_OF_CELL_CYCLE_PROCESS	0	0	0	0	0	0	0	0	0	0	0	0	0	0	0
GO_MITOCHONDRION_ORGANIZATION	0	0	0	0	0	0	0	0	0	0	0	0	0	0	0
TGTTTAC,MIR-30A-5P,MIR-30C,MIR-30D,MIR-30B,MIR-30E-5P	0	0	0	0	0	0	0	0	0	0	0	0	0	0	0
MARTINEZ_TP53_TARGETS_UP	0	0	0	0	0	0	0	0	0	0	0	0	0	0	0
GO_NEGATIVE_REGULATION_OF_CELL_DIFFERENTIATION	0	0	0	0	0	0	0	1.41684	0	0	0	0	0	0	0
KIM_BIPOLAR_DISORDER_OLIGODENDROCYTE_DENSITY_CORR_UP	0	0	3.48931	0	0	0	0	3.83793	0	0	0.872478	0	0	0	0
SCHLOSSER_SERUM_RESPONSE_DN	0	0	0	0	0	0	0	0	0	0	0	0	0	0	0
GO_NEURON_DEVELOPMENT	0	0	0	0	0	0	0	0	0	0	0	0	0	0	0
TGCCAAR_V$NF1_Q6	0	0	0	0	0	0	0	0	0	0	0	0	0	0	0
GO_CELL_CELL_SIGNALING	0	0	0	0	0	0	0	0	0	0	0	0	0	0	0
ICHIBA_GRAFT_VERSUS_HOST_DISEASE_35D_UP	0	0	0	0	0	0	6.15173	0	0	0	0	0	0	0	0
HALLMARK_UV_RESPONSE_UP	0	0	0	0	0	0	3.68256	0	0	0	0	0.950737	0	0	0
GSE42021_TREG_PLN_VS_CD24INT_TREG_THYMUS_DN	0	0	0	0	0	0	3.26981	0	0	0	0	0	0	0	0
GSE9988_ANTI_TREM1_VS_ANTI_TREM1_AND_LPS_MONOCYTE_DN	0	0	0	0	0	0	3.22031	0	0	0	0	0	0	0	0
GSE36888_UNTREATED_VS_IL2_TREATED_STAT5_AB_KNOCKIN_TCELL_6H_UP	0	0	0	0	0	0	3.02624	0	0	0	0	0	0	0	0
GSE2706_UNSTIM_VS_8H_R848_DC_UP	0	0	0	0	0	0	2.97875	0	0	0	0	2.166	0	0	0
GSE9988_ANTI_TREM1_VS_LPS_MONOCYTE_DN	0	0	0	0	0	0	2.70213	0	0	0	0	0	0	0	0
GSE3920_UNTREATED_VS_IFNA_TREATED_ENDOTHELIAL_CELL_UP	0	0	0	0	0	0	2.6574	0	0	0	0	3.65103	0	0	0
GSE22140_GERMFREE_VS_SPF_MOUSE_CD4_TCELL_UP	0	0	0	0	0	0	2.56896	0	0	0	0	0	0	0	0
GSE46606_IRF4MID_VS_WT_CD40L_IL2_IL5_DAY3_STIMULATED_BCELL_DN	0	0	0	0	0	0	2.56896	0	0	0	0	0	0	0	0
GSE2770_UNTREATED_VS_ACT_CD4_TCELL_2H_UP	0	0	0	0	0	0	2.52526	0	0	0	0	1.0809	0	0	0
GSE29618_BCELL_VS_MDC_DAY7_FLU_VACCINE_DN	0	0	0	0	0	0	2.48192	0	0	0	0	0	0	0	0
GSE21360_SECONDARY_VS_QUATERNARY_MEMORY_CD8_TCELL_UP	0	0	0	0	0	0	2.48192	0	0	0	0	0	0	0	0
GSE22886_NAIVE_CD4_TCELL_VS_MONOCYTE_DN	0	0	0	0	0	0	2.43897	0	0	0	0	4.36198	0	0	0
GSE9988_LPS_VS_VEHICLE_TREATED_MONOCYTE_DN	0	0	0	0	0	0	2.39637	0	0	0	0	0	0	0	0
GSE46606_IRF4_KO_VS_WT_UNSTIM_BCELL_DN	0	0	0	0	0	0	2.39637	0	0	0	0	0	0	0	0
WIERENGA_STAT5A_TARGETS_DN	0	0	0	0	0	0	2.35411	0	0	0	0	0	0	0	0
GSE24634_TREG_VS_TCONV_POST_DAY3_IL4_CONVERSION_DN	0	0	0	0	0	0	2.35411	0	0	0	0	0.978084	0	0	0
GSE36826_WT_VS_IL1R_KO_SKIN_DN	0	0	0	0	0	0	2.31216	0	0	0	0	0	0	0	0
GSE9988_ANTI_TREM1_VS_VEHICLE_TREATED_MONOCYTES_DN	0	0	0	0	0	0	2.27056	0	0	0	0	1.69757	0	0	0
GSE9988_LOW_LPS_VS_VEHICLE_TREATED_MONOCYTE_DN	0	0	0	0	0	0	2.27056	0	0	0	0	0	0	0	0
GSE3039_ALPHAALPHA_VS_ALPHABETA_CD8_TCELL_UP	0	0	0	0	0	0	2.27056	0	0	0	0	0.928056	0	0	0
GSE19888_ADENOSINE_A3R_ACT_VS_TCELL_MEMBRANES_ACT_IN_MAST_CELL_UP	0	0	0	0	0	0	2.27056	0	0	0	0	1.69757	0	0	0
GSE22935_WT_VS_MYD88_KO_MACROPHAGE_12H_MBOVIS_BCG_STIM_DN	0	0	0	0	0	0	2.27056	0	0	0	0	0	0	0	0
GSE37605_FOXP3_FUSION_GFP_VS_IRES_GFP_TREG_C57BL6_UP	0	0	0	0	0	0	2.27056	0	0	0	0	0.928056	0	0	0
GSE29618_BCELL_VS_MONOCYTE_DN	0	0	0	0	0	0	2.22935	0	0	0	0	3.31199	0	0	0
GSE2405_HEAT_KILLED_LYSATE_VS_LIVE_A_PHAGOCYTOPHILUM_STIM_NEUTROPHIL_24H_UP	0	0	0	0	0	0	2.22935	0	0	0	0	0	0	0	0
GSE9316_IL6_KO_VS_IFNG_KO_INVIVO_EXPANDED_CD4_TCELL_DN	0	0	0	0	0	0	2.10737	0	0	0	0	0	0	0	0
GSE7219_UNSTIM_VS_LPS_AND_ANTI_CD40_STIM_NIK_NFKB2_KO_DC_DN	0	0	0	0	0	0	2.10737	0	0	0	0	3.21477	0	0	0
GSE43863_DAY6_EFF_VS_DAY150_MEM_TH1_CD4_TCELL_UP	0	0	0	0	0	0	2.10737	0	0	0	0	0.110902	0	0	0
KAECH_NAIVE_VS_MEMORY_CD8_TCELL_DN	0	0	0	0	0	0	2.06748	0	0	0	0	0	0	0	0
GSE9650_EFFECTOR_VS_EXHAUSTED_CD8_TCELL_UP	0	0	0	0	0	0	2.06748	0	0	0	0	0	0	0	0.346501
GSE17301_CTRL_VS_48H_ACD3_ACD28_STIM_CD8_TCELL_DN	0	0	0	0	0	0	2.06748	0	0	0	0	0	0	0	0
GSE18804_SPLEEN_MACROPHAGE_VS_COLON_TUMORAL_MACROPHAGE_UP	0	0	0	0	0	0	2.06748	0	0	0	0	2.35517	0	0	0
GSE42021_TREG_PLN_VS_CD24INT_TREG_THYMUS_UP	0	0	0	0	0	0	1.98843	0	0	0	0	0	0	0	0
GSE22140_GERMFREE_VS_SPF_MOUSE_CD4_TCELL_DN	0	0	0	0	0	0	1.91047	0	0	0	0	0.710344	0	0	0
GO_REGULATION_OF_LEUKOCYTE_DIFFERENTIATION	0	0	0	0	0	0	1.22698	0	0	0	0	0.992738	0	0	0
REACTOME_INNATE_IMMUNE_SYSTEM	0	0	0	0	0	0	1.19364	0	0	0	0	1.70508	0	0	0
V$PU1_Q6	0	0	0	0	0	0	0.998155	0	0	0	0	0	0	0	0
WINTER_HYPOXIA_METAGENE	0	0	0	0	0	0	0.872585	0	0	0	0	0.0732007	0	0	0
GO_RESPONSE_TO_ENDOPLASMIC_RETICULUM_STRESS	0	0	0	0	0	0	0.750154	0	0	0	0	0	0	0	0
V$SREBP1_Q6	0	0	0	0	0	0	0.720037	0	0	0	0	0	0	0	0
V$ETS_Q4	0	0	0	0	0	0	0.660587	0	0	0	0	0	0	0	0
GO_POSITIVE_REGULATION_OF_INNATE_IMMUNE_RESPONSE	0	0	0	0	0	0	0.631152	0	0	0	0	0.581236	0	0	0
POOLA_INVASIVE_BREAST_CANCER_UP	0	0	0	0	0	0	0.348136	0	0	0	0	0	0	0	0
V$NFKB_Q6	0	0	0	0	0	0	0.239823	0	0	0	0	0	0	0	0
V$CREB_Q2	0	0	0	0	0	0	0.13456	0	0	0	0	0	0	0	0
GO_NUCLEAR_MEMBRANE	0	0	0	0	0	0	0.00688664	0	0	0	0	0	0	0	0
HELLER_HDAC_TARGETS_DN	0	0	0	0	0	0	0	0	0	0	0	0	0	0	0
GO_IN_UTERO_EMBRYONIC_DEVELOPMENT	0	0	0	0	0	0	0	0	0	0	0	0	0	0	0
IWANAGA_CARCINOGENESIS_BY_KRAS_PTEN_DN	0	0	0	0	0	0	0	0	0	0	0	0	0	0	0
GO_TRANSCRIPTION_FACTOR_ACTIVITY_RNA_POLYMERASE_II_CORE_PROMOTER_PROXIMAL_REGION_SEQUENCE_SPECIFIC_BINDING	0	0	0	0	0	0	0	0	0	0	0	0	0	0	0
GO_PROTEINACEOUS_EXTRACELLULAR_MATRIX	0	0	0	0	0	0	0	0	0	0	0	0.022894	0	0	0
GO_REGULATION_OF_SEQUENCE_SPECIFIC_DNA_BINDING_TRANSCRIPTION_FACTOR_ACTIVITY	0	0	0	0	0	0	0	0	0	0	0	1.13235	0	0	0
YOSHIMURA_MAPK8_TARGETS_DN	0	0	0	0	0	0	0	0.863538	0	0	0	0	0	0	0
MOREAUX_MULTIPLE_MYELOMA_BY_TACI_UP	0	0	0	0	0	0	0	0	0	0	0	0	0	0	0
GO_RESPONSE_TO_DRUG	0	0	0	0	0	0	0	0	0	0	0	0	0	0	0
GO_REGULATION_OF_VESICLE_MEDIATED_TRANSPORT	0	0	0	0	0	0	0	0	0	0	0	0	0	0	0
REACTOME_GPCR_DOWNSTREAM_SIGNALING	0	0	0	0	0	0	0	0	0	0	0	0	0	0	0
GO_SKELETAL_SYSTEM_DEVELOPMENT	0	0	0	0	0	0	0	0	0	0	0	0	0	0	0
REACTOME_METABOLISM_OF_LIPIDS_AND_LIPOPROTEINS	0	0	0.568879	0	0	0	0	0	0	0	0	0	0.105718	0	0
STEIN_ESRRA_TARGETS_ORIGINAL	0	0	0	0	0	0	0	4.92843	0	0	0	0	0	0	0
GO_SECRETION_BY_CELL	0	0	0	0	0	0	0	0	0	0	0	0	0	0	0
GO_VESICLE_MEMBRANE	0	0	0	0	0	0	0	0	0	0	0	0	0	0	0
GO_NUCLEAR_CHROMOSOME	0	0	0	0	0	0	0	0	0	0	0	0	0	0	0
MODULE_163	0	0	0	0	0	0	0	0	0	0	0	0	0	0	0
GO_NUCLEOBASE_CONTAINING_SMALL_MOLECULE_METABOLIC_PROCESS	0	0	0	0	0	0	0	1.31426	0	0	0	0	0	0	0
SMID_BREAST_CANCER_LUMINAL_B_DN	0	0	0	0	0	0	0	0	0	0	0	0	0	0	0
GO_PROTEIN_LOCALIZATION_TO_ORGANELLE	0	0	0	0	0	0	0	0	0	0	0	0	0	0	0
CASORELLI_ACUTE_PROMYELOCYTIC_LEUKEMIA_DN	0	0	0	0	0	0	0	0	0	0	0	0	0	0	0
GO_G_PROTEIN_COUPLED_RECEPTOR_SIGNALING_PATHWAY	0	0	0	0	0	0	0	0	0	0	0	0	0	0	0
GO_ENZYME_LINKED_RECEPTOR_PROTEIN_SIGNALING_PATHWAY	0	0	0	0	0	0	0	0	0	0	0	1.51553	0	0	0
GO_REGULATION_OF_NERVOUS_SYSTEM_DEVELOPMENT	0	0	0	0	0	0	0	0	0	0	0	0	0	0	0
PUJANA_CHEK2_PCC_NETWORK	0	0	0	0	0	0	0	0	0	0	0	0	0	0	0
GO_NEURON_PROJECTION	0	0	0	0	0	0	0	0	0	0	0	0	0.619415	0	0
BENPORATH_EED_TARGETS	0	0	0	0	0	0	0	0	0	0	0	0	1.55641	0	0
GALINDO_IMMUNE_RESPONSE_TO_ENTEROTOXIN	0	0	0	0	0	0	8.37117	0	0	0	0	2.79047	0	0	0
MORF_DDX11	0	0	0	0	0	0	3.33559	0	0	0	0	0	0	0	0
IGLESIAS_E2F_TARGETS_UP	0	0	0	0	0	0	3.22968	0	0	0	0	0.304354	0	0	0
GSE3920_IFNA_VS_IFNG_TREATED_ENDOTHELIAL_CELL_UP	0	0	0	0	0	0	2.92358	0	0	0	0	0	0	0	0
GSE6269_E_COLI_VS_STAPH_AUREUS_INF_PBMC_DN	0	0	0	0	0	0	2.68103	0	0	0	0	0.031084	0	0	0
GSE24634_TREG_VS_TCONV_POST_DAY5_IL4_CONVERSION_DN	0	0	0	0	0	0	2.31487	0	0	0	0	0	0	0	0
ESC_V6.5_UP_EARLY.V1_DN	0	0	0	0	0	0	2.18411	0	0	0	0	0	0	0	0
GSE34156_UNTREATED_VS_6H_TLR1_TLR2_LIGAND_TREATED_MONOCYTE_UP	0	0	0	0	0	0	2.18411	0	0	0	0	0	0	0	0
GSE29618_MONOCYTE_VS_MDC_UP	0	0	0	0	0	0	2.09866	0	0	0	0	0	0	0	0
GSE3039_CD4_TCELL_VS_B1_BCELL_DN	0	0	0	0	0	0	2.09866	0	0	0	0	0	0	0	0
GSE21360_PRIMARY_VS_QUATERNARY_MEMORY_CD8_TCELL_UP	0	0	0	0	0	0	2.09866	0	0	0	0	2.0137	0	0	0
GSE27241_CTRL_VS_DIGOXIN_TREATED_CD4_TCELL_IN_TH17_POLARIZING_CONDITIONS_DN	0	0	0	0	0	0	2.09866	0	0	0	0	0	0	0	0
GSE37532_TREG_VS_TCONV_PPARG_KO_CD4_TCELL_FROM_LN_DN	0	0	0	0	0	0	1.89132	0	0	0	0	0	0	0	0
GSE19198_CTRL_VS_IL21_TREATED_TCELL_6H_DN	0	0	0	0	0	0	1.85091	0	0	0	0	0	0	0	0
GSE22432_PDC_VS_TGFB1_TREATEDCOMMON_DC_PROGENITOR_DN	0	0	0	0	0	0	1.85091	0	0	0	0	0	0	0	0
GSE43863_TH1_VS_TFH_MEMORY_CD4_TCELL_DN	0	0	0	0	0	0	1.85091	0	0	0	0	0	0	0	0
GSE29618_BCELL_VS_MONOCYTE_DAY7_FLU_VACCINE_DN	0	0	0	0	0	0	1.81079	0	0	0	0	1.80955	0	0	0
GSE7460_TREG_VS_TCONV_ACT_WITH_TGFB_DN	0	0	0	0	0	0	1.81079	0	0	0	0	0	0	0	0
GSE12845_IGD_NEG_BLOOD_VS_PRE_GC_TONSIL_BCELL_UP	0	0	0	0	0	0	1.77098	0	0	0	0	0	0	0	0
GSE29618_MONOCYTE_VS_PDC_DAY7_FLU_VACCINE_UP	0	0	0	0	0	0	1.77098	0	0	0	0	1.00349	0	0	0
GSE3982_NEUTROPHIL_VS_CENT_MEMORY_CD4_TCELL_UP	0	0	0	0	0	0	1.77098	0	0	0	0	0	0	0	0
GSE17186_NAIVE_VS_CD21LOW_TRANSITIONAL_BCELL_UP	0	0	0	0	0	0	1.77098	0	0	0	0	0	0	0	0
GSE40225_WT_VS_RIP_B7X_DIABETIC_MOUSE_PANCREATIC_CD8_TCELL_DN	0	0	0	0	0	0	1.77098	0	0	0	0	0.265729	0	0	0
GSE41867_NAIVE_VS_DAY6_LCMV_EFFECTOR_CD8_TCELL_UP	0	0	0	0	0	0	1.77098	0	0	0	0	0	0	0	0
GSE17721_LPS_VS_PAM3CSK4_6H_BMDC_DN	0	0	0	0	0	0	1.69234	0	0	0	0	0	0	0	0
GSE5589_LPS_VS_LPS_AND_IL10_STIM_IL6_KO_MACROPHAGE_180MIN_UP	0	0	0	0	0	0	1.69234	0	0	0	0	0	0	0	0
GSE22886_NAIVE_BCELL_VS_BM_PLASMA_CELL_DN	0	0	0	0	0	0	1.65347	0	0	0	0	0	0	0	0
HALLMARK_ALLOGRAFT_REJECTION	0	0	0	0	0	0	1.65347	0	0	0	0	0	0	0	0
GSE41176_WT_VS_TAK1_KO_ANTI_IGM_STIM_BCELL_6H_DN	0	0	0	0	0	0	1.65347	0	0	0	0	0	0	0	0
GO_ENDOPLASMIC_RETICULUM_LUMEN	0	0	0	0	0	0	1.65347	0	0	0	0	0	0	0	0
GSE45365_NK_CELL_VS_CD11B_DC_MCMV_INFECTION_DN	0	0	0	0	0	0	1.61495	0	0	0	0	0	0	0	0
GSE22886_NAIVE_CD8_TCELL_VS_DC_DN	0	0	0	0	0	0	1.57687	0	0	0	0	0	0	0	0
GSE21546_SAP1A_KO_VS_SAP1A_KO_AND_ELK1_KO_DP_THYMOCYTES_UP	0	0	0	0	0	0	1.57687	0	0	0	0	0	0	0	0
GSE42088_UNINF_VS_LEISHMANIA_INF_DC_24H_UP	0	0	0	0	0	0	1.57687	0	0	0	0	4.14675	0	0	0
GSE2405_0H_VS_12H_A_PHAGOCYTOPHILUM_STIM_NEUTROPHIL_UP	0	0	0	0	0	0	1.53911	0	0	0	0	0	0	0	0
GSE43955_10H_VS_60H_ACT_CD4_TCELL_UP	0	0	0	0	0	0	1.53911	0	0	0	0	0	0	0	0
KAECH_DAY15_EFF_VS_MEMORY_CD8_TCELL_DN	0	0	0	0	0	0	1.5016	0	0	0	0	0	0	0	0
GSE15330_WT_VS_IKAROS_KO_GRANULOCYTE_MONOCYTE_PROGENITOR_DN	0	0	0	0	0	0	1.5016	0	0	0	0	0	0	0	0
GSE43955_1H_VS_10H_ACT_CD4_TCELL_WITH_TGFB_IL6_DN	0	0	0	0	0	0	1.5016	0	0	0	0	0	0	0	0
GSE4748_CTRL_VS_CYANOBACTERIUM_LPSLIKE_STIM_DC_3H_DN	0	0	0.857727	0	0	0	1.46431	0	0	0	0	0	0	0	0
GSE22443_NAIVE_VS_ACT_AND_IL12_TREATED_CD8_TCELL_UP	0	0	0	0	0	0	1.4273	0	0	0	0	0	0	0	0
GSE17721_LPS_VS_PAM3CSK4_2H_BMDC_UP	0	0	0	0	0	0	1.35419	0	0	0	0	1.48254	0	0	0
GSE339_CD8POS_VS_CD4CD8DN_DC_IN_CULTURE_UP	0	0	0	0	0	0	1.31805	0	0	0	0	0	0	0	0
GO_ACTIVATION_OF_INNATE_IMMUNE_RESPONSE	0	0	0	0	0	0	1.31805	0	0	0	0	0	0	0	0
GSE19198_CTRL_VS_IL21_TREATED_TCELL_24H_UP	0	0	0	0	0	0	1.28229	0	0	0	0	0.686882	0	0	0
GO_NEGATIVE_REGULATION_OF_CELL_ADHESION	0	0	0	0	0	0	0.971947	0	0	0	0	0	0	0	0
MORF_FDXR	0	0	0	0	0	0	0.713196	0	0	0	0	0	0	0	0
HIRSCH_CELLULAR_TRANSFORMATION_SIGNATURE_UP	0	0	0	0	0	0	0.411031	0	0	0	0	0	0	0	0
MORF_MT4	0	0	0	0	0	0	0.382042	0	0	0	0	0	0	0	0
chr6p21	0	0	0	0	0	0	0.183932	0	0	0	0	0	0	0	0
BILD_HRAS_ONCOGENIC_SIGNATURE	0	0	0	0	0	0	0.156556	0	0	0	0	0	0	0	0
V$NFKAPPAB_01	0	0	0	0	0	0	0.0220661	0	0	0	0	0	0	0	0
REACTOME_CYTOKINE_SIGNALING_IN_IMMUNE_SYSTEM	0	0	0	0	0	0	0	0	0	0	0	0	0	0	0
WALLACE_PROSTATE_CANCER_RACE_UP	0	0	0	0	0	0	0	0	0	0	0	0	0	0	0
GO_LEUKOCYTE_MIGRATION	0	0	0	0	0	0	0	0	0	0	0	1.79092	0	0	0
V$CREL_01	0	0	0	0	0	0	0	0	0	0	0	0	0	0	0
V$CREB_Q4	0	0	0	0	0	0	0	0	0	0	0	0	0	0	0
GO_REGULATION_OF_SMALL_GTPASE_MEDIATED_SIGNAL_TRANSDUCTION	0	0	0	0	0	0	0	0	0	0	0	0	0	0	0
GO_POSITIVE_REGULATION_OF_RESPONSE_TO_EXTERNAL_STIMULUS	0	0	0	0	0	0	0	0	0	0	0	0	0	0	0
GO_GUANYL_NUCLEOTIDE_EXCHANGE_FACTOR_ACTIVITY	0	0	0	0	0	0	0	0	0	0	0	0	0	0	0
CCCNNGGGAR_V$OLF1_01	0	0	0	0	0	0	0	0	0	0	0	0	0	0	0
PURBEY_TARGETS_OF_CTBP1_NOT_SATB1_UP	0	0	0	0	0	0	0	0	0	0	0	0	0	0	0
GO_CORE_PROMOTER_PROXIMAL_REGION_DNA_BINDING	0	0	0	0	0	0	0	0	0	0	0	0	0	0	0
RUTELLA_RESPONSE_TO_CSF2RB_AND_IL4_UP	0	0	0	0	0	0	0	0	0	0	0	0	1.60251	0	0
ACEVEDO_NORMAL_TISSUE_ADJACENT_TO_LIVER_TUMOR_DN	0	0	0	0	0	0	0	0	0	0	0	0	0	0	0
GO_LYMPHOCYTE_ACTIVATION	0	0	0	0	0	0	0	0	0	0	0	0	0	0	0
MODULE_27	0	0	0	0	0	0	0	0	0	0	0	0.331532	0	0	0
GO_TUBE_MORPHOGENESIS	0	0	0	0	0	0	0	0	0	0	0	0	0	0	0
GO_SECRETORY_GRANULE	0	0	0	0	0	0	0	0	0	0	0	0	0	0	0
GO_GLYCOPROTEIN_METABOLIC_PROCESS	0	0	0	0	0	0	0	0	0	0	0	0	0	0	0
WANG_RESPONSE_TO_GSK3_INHIBITOR_SB216763_DN	0	0	0	0	0	0	0	0	0	0	0	0	0	0	0
GO_POSITIVE_REGULATION_OF_INTRACELLULAR_TRANSPORT	0	0	0	0	0	0	0	0	0	0	0	0	0	0	0
RICKMAN_TUMOR_DIFFERENTIATED_WELL_VS_POORLY_DN	0	0	0	0	0	0	0	0	0	0	0	0	0	0	0
GO_REGULATION_OF_APOPTOTIC_SIGNALING_PATHWAY	0	0	0	0	0	0	0	0	0	0	0	0	0	0	0
GO_CIRCULATORY_SYSTEM_PROCESS	0	0	0	0	0	0	0	0	0	0	0	0	0	0	0
REACTOME_DEVELOPMENTAL_BIOLOGY	0	0	0	0	0	0	0	0	0	0	0	0	0	0	0
GO_POSITIVE_REGULATION_OF_CATABOLIC_PROCESS	0	0	0	0	0	0	0	0	0	0	0	0	0	0	0
LIM_MAMMARY_STEM_CELL_DN	0	0	0	0	0	0	0	0	0	0	0	0	0	0	0
GO_EMBRYONIC_ORGAN_DEVELOPMENT	0	0	0	0	0	0	0	0	0	0	0	0	0	0	0
GO_PROTEIN_OLIGOMERIZATION	0	0	0	0	0	0	0	0	0	0	0	0	0	0	0
GO_CHROMATIN	0	0	0	0	0	0	0	0	0	0	0	0	0	0	0
GO_CHROMATIN_BINDING	0	0	0	0	0	0	0	0	0	0	0	0	0	0	0
GO_RESPONSE_TO_EXTRACELLULAR_STIMULUS	0	0	0	0	0	0	0	0	0	0	0	1.67593	0	0	0
GO_PROTEIN_SERINE_THREONINE_KINASE_ACTIVITY	0	0	0	0	0	0	0	0	0	0	0	0	0	0	0
GO_SECRETORY_VESICLE	0	0	0	0	0	0	0	0	0	0	0	0	0	0	0
GO_REGULATION_OF_MITOTIC_CELL_CYCLE	0	0	0	0	0	0	0	0	0	0	0	0	0	0	0
GO_ENZYME_ACTIVATOR_ACTIVITY	0	0	0	0	0	0	0	0	0	0	0	0	0	0	0
MODULE_69	0	0	0	0	0	0	0	0	0	0	0	0	0	0	0
CREIGHTON_ENDOCRINE_THERAPY_RESISTANCE_1	0	0	0	0	0	0	0	0	0	0	0	0	0	0	0
GO_REGULATION_OF_CYTOPLASMIC_TRANSPORT	0	0	0	0	0	0	0	0	0	0	0	0	0	0	0
SENESE_HDAC3_TARGETS_DN	0	0	0	0	0	0	0	0	0	0	0	0	0	0	0
LIAO_METASTASIS	0	0	0	0	0	0	0	0	0	0	0	0	0	0	0
ONKEN_UVEAL_MELANOMA_DN	0	0	0	0	0	0	0	0.253169	0	0	0	0	0	0	0
GO_REGULATION_OF_ION_TRANSPORT	0	0	0	0	0	0	0	0	0	0	0	0	0	0	0
SMID_BREAST_CANCER_BASAL_UP	0	0	0	0	0	0	0	0	0	0	0	0	1.30485	0	0
TGACATY_UNKNOWN	0	0	0	0	0	0	0	0	0	0	0	0	0	0	0
GO_CELLULAR_HOMEOSTASIS	0	0	0	0	0	0	0	0	0	0	0	0	0	0	0
RODRIGUES_THYROID_CARCINOMA_ANAPLASTIC_UP	0	0	0	0	0	0	0	0	0	0	0	0	0	0	0
GO_ION_TRANSMEMBRANE_TRANSPORT	0	0	0	0	0	0	0	0	0	0	0	0	0	0	0
GO_CELL_PROJECTION_PART	0	0	0	0	0	0.668482	0	0	0	0	0	0	0	0	0
PHONG_TNF_TARGETS_UP	0	0.507026	0	0	0	0	9.3973	0	0	0	0	3.80757	0	0	0
HESS_TARGETS_OF_HOXA9_AND_MEIS1_DN	0	0	0	0	0	0	8.41727	0	0	0	0	1.17089	0	0	0
KEEN_RESPONSE_TO_ROSIGLITAZONE_DN	0	0	0	0	0	0	5.27113	0	0	0	0	0	0	0	0
RASHI_RESPONSE_TO_IONIZING_RADIATION_2	0	0	0	0	0	0	3.85684	0	0	0	0	0	0	0	0
HUANG_GATA2_TARGETS_UP	0	0	0	0	0	0	3.09661	0	0	0	0	0	0	0	0
GROSS_HYPOXIA_VIA_ELK3_AND_HIF1A_UP	0	0	0	0	0	0	3.04232	0	0	0	0	0	0	0	0
TSAI_RESPONSE_TO_IONIZING_RADIATION	0	0	0	0	0	0	2.83058	0	0	0	0	1.27621	0	0	0
GROSS_HYPOXIA_VIA_ELK3_DN	0	0	0	0	0	0	2.52809	0	0	0	0	0.304354	0	0	0
GSE40274_CTRL_VS_FOXP3_AND_XBP1_TRANSDUCED_ACTIVATED_CD4_TCELL_DN	0	0	0	0	0	0	2.38341	0	0	0	0	0	0	0	0
GSE6269_FLU_VS_STAPH_AUREUS_INF_PBMC_DN	0	0	0	0	0	0	2.06134	0	0	0	0	0.0548586	0	0	0
GSE36888_UNTREATED_VS_IL2_TREATED_TCELL_17H_DN	0	0	0	0	0	0	1.97296	0	0	0	0	0	0	0	0
GSE17974_CTRL_VS_ACT_IL4_AND_ANTI_IL12_1H_CD4_TCELL_UP	0	0	0	0	0	0	1.88614	0	0	0	0	0	0	0	0
GSE29617_CTRL_VS_DAY7_TIV_FLU_VACCINE_PBMC_2008_UP	0	0	0	0	0	0	1.80096	0	0	0	0	1.43714	0	0	0
GSE7768_OVA_ALONE_VS_OVA_WITH_LPS_IMMUNIZED_MOUSE_WHOLE_SPLEEN_6H_DN	0	0	0	0	0	0	1.80096	0	0	0	0	0	0	0	0
GSE41978_ID2_KO_VS_BIM_KO_KLRG1_LOW_EFFECTOR_CD8_TCELL_UP	0	0	0	0	0	0	1.80096	0	0	0	0	0	0	0	0
GSE46242_CTRL_VS_EGR2_DELETED_ANERGIC_TH1_CD4_TCELL_DN	0	0	0	0	0	0	1.71726	0	0	0	0	0	0	0	0
GSE25677_MPL_VS_R848_STIM_BCELL_UP	0	0	0	0	0	0	1.63493	0	0	0	0	0	0	0	0
MCBRYAN_PUBERTAL_TGFB1_TARGETS_UP	0	0	0	0	0	0	1.59435	0	0	0	0	0	0	0	0
NAGASHIMA_NRG1_SIGNALING_UP	0	0	0	0	0	0	1.55425	0	0	0	0	0	0	0	0
GSE6259_FLT3L_INDUCED_33D1_POS_DC_VS_CD4_TCELL_UP	0	0	0	0	0	0	1.55425	0	0	0	0	2.0739	0	0	0
GSE28726_NAIVE_VS_ACTIVATED_VA24NEG_NKTCELL_DN	0	0	0	0	0	0	1.55425	0	0	0	0	0	0	0	0
GSE32986_UNSTIM_VS_GMCSF_AND_CURDLAN_LOWDOSE_STIM_DC_DN	0	0	0	0	0	0	1.55425	0	0	0	0	0	0	0	0
VEGF_A_UP.V1_UP	0	0	0	0	0	0	1.51449	0	0	0	0	0	0	0	0
GSE11057_PBMC_VS_MEM_CD4_TCELL_UP	0	0	0	0	0	0	1.51449	0	0	0	0	2.04363	0	0	0
GSE2706_2H_VS_8H_LPS_STIM_DC_UP	0	0	0	0	0	0	1.51449	0	0	0	0	0	0	0	0
GSE46242_TH1_VS_ANERGIC_TH1_CD4_TCELL_WITH_EGR2_DELETED_UP	0	0	0	0	0	0	1.47495	0	0	0	0	0	0	0	0
GSE19825_CD24LOW_VS_IL2RA_HIGH_DAY3_EFF_CD8_TCELL_UP	0	0	0	0	0	0	1.43579	0	0	0	0	0	0	0	0
GSE19401_UNSTIM_VS_RETINOIC_ACID_STIM_FOLLICULAR_DC_UP	0	0	0	0	0	0	1.39694	0	0	0	0	0	0	0	0
GSE11961_MARGINAL_ZONE_BCELL_VS_GERMINAL_CENTER_BCELL_DAY40_DN	0	0	0	0	0	0	1.39694	0	0	0	0	1.95427	0	0	0
GSE27786_LIN_NEG_VS_BCELL_DN	0	0	0	0	0	0	1.35837	0	0	0	0	0	0	0	0
GSE34156_UNTREATED_VS_24H_NOD2_LIGAND_TREATED_MONOCYTE_DN	0	0	0	0	0	0	1.35837	0	0	0	0	0	0	0	0
GSE27786_NKCELL_VS_ERYTHROBLAST_UP	0	0	0	0	0	0	1.32017	0	0	0	0	0	0	0	0
GSE30083_SP2_VS_SP4_THYMOCYTE_DN	0	0	0	0	0	0	1.28233	0	0	0	0	0.334763	0	0	0
GSE7852_TREG_VS_TCONV_THYMUS_DN	0	0	0	0	0	0	1.28233	0	0	0	0	0	0	0	0
GSE1460_INTRATHYMIC_T_PROGENITOR_VS_CD4_THYMOCYTE_DN	0	0	0	0	0	0	1.24484	0	0	0	0	0	0	0	0
GSE17301_ACD3_ACD28_VS_ACD3_ACD28_AND_IFNA5_STIM_CD8_TCELL_DN	0	0	0	0	0	0	1.24484	0	0	0	0	0	0	0	0
GSE5503_MLN_DC_VS_SPLEEN_DC_ACTIVATED_ALLOGENIC_TCELL_UP	0	0	0	0	0	0	1.20756	0	0	0	0	0	0	0	0
GSE35685_CD34POS_CD38NEG_VS_CD34POS_CD10POS_BONE_MARROW_DN	0	0	0	0	0	0	1.20756	0	0	0	0	0.288504	0	0	0
GSE43863_NAIVE_VS_MEMORY_LY6C_INT_CXCR5POS_CD4_TCELL_D150_LCMV_UP	0	0	0	0	0	0	1.20756	0	0	0	0	0	0	0	0
GSE2770_IL12_AND_TGFB_VS_IL4_TREATED_ACT_CD4_TCELL_48H_UP	0	0	0	0	0	0	1.17068	0	0	0	0	0	0	0	0
GSE14908_RESTING_VS_HDM_STIM_CD4_TCELL_NONATOPIC_PATIENT_DN	0	0	0	0	0	0	1.17068	0	0	0	0	0	0	0	0
GSE21380_NON_TFH_VS_TFH_CD4_TCELL_UP	0	0	0	0	0	0	1.17068	0	0	0	0	0	0	0	0
GSE23925_LIGHT_ZONE_VS_NAIVE_BCELL_UP	0	0	0	0	0	0	1.17068	0	0	0	0	0	0	0	0
GSE27786_BCELL_VS_NKTCELL_DN	0	0	0	0	0	0	1.13401	0	0	0	0	0	0	0	0
GSE5589_UNSTIM_VS_180MIN_LPS_STIM_MACROPHAGE_DN	0	0	0	0	0	0	1.09761	0	0	0	0	0	0	0	0
GSE24726_WT_VS_E2-2_KO_PDC_DN	0	0	0	0	0	0	1.09761	0	0	0	0	0	0	0	0
GSE10239_NAIVE_VS_DAY4.5_EFF_CD8_TCELL_UP	0	0	0	0	0	0	1.06156	0	0	0	0	0	0	0	0
GSE20715_0H_VS_6H_OZONE_LUNG_UP	0	0	0	0	0	0	1.06156	0	0	0	0	0	0	0	0
GSE360_CTRL_VS_L_DONOVANI_MAC_UP	0	0	0	0	0	0	1.06156	0	0	0	0	0	0	0	0
GSE3039_ALPHAALPHA_CD8_TCELL_VS_B1_BCELL_UP	0	0	0	0	0	0	1.06156	0	0	0	0	0	0	0	0
GSE5099_UNSTIM_VS_MCSF_TREATED_MONOCYTE_DAY7_DN	0	0	0	0	0	0	1.06156	0	0	0	0	0	0	0	0
GSE22140_HEALTHY_VS_ARTHRITIC_MOUSE_CD4_TCELL_UP	0	0	0	0	0	0	1.06156	0	0	0	0	0	0	0	0
GSE16385_MONOCYTE_VS_12H_IFNG_TNF_TREATED_MACROPHAGE_UP	0	0	0	0	0	0	1.06156	0	0	0	0	0	0	0	0
GSE17721_POLYIC_VS_GARDIQUIMOD_1H_BMDC_DN	0	0	0	0	0	0	1.0259	0	0	0	0	0.176281	0	0	0
GSE15735_CTRL_VS_HDAC_INHIBITOR_TREATED_CD4_TCELL_2H_UP	0	0	0	0	0	0	1.0259	0	0	0	0	0	0	0	0
GSE14769_UNSTIM_VS_20MIN_LPS_BMDM_DN	0	0	0	0	0	0	0.990474	0	0	0	0	1.64275	0	0	0
GSE14769_UNSTIM_VS_120MIN_LPS_BMDM_DN	0	0	0	0	0	0	0.990474	0	0	0	0	0.154297	0	0	0
GSE27786_LIN_NEG_VS_NKCELL_DN	0	0	0	0	0	0	0.990474	0	0	0	0	0	0	0	0
GSE17301_CTRL_VS_48H_ACD3_ACD28_IFNA2_STIM_CD8_TCELL_UP	0	0	0	0	0	0	0.990474	0	0	0	0	0	0	0	0
GSE26030_UNSTIM_VS_RESTIM_TH17_DAY15_POST_POLARIZATION_DN	0	0	0	0	0	0	0.990474	0	0	0	0	0	0	0	0
GSE12392_WT_VS_IFNB_KO_CD8A_NEG_SPLEEN_DC_UP	0	0	0	0	0	0	0.955337	0	0	0	0	0	0	0	0
GSE21379_WT_VS_SAP_KO_TFH_CD4_TCELL_UP	0	0	0	0	0	0	0.955337	0	0	0	0	0	0	0	0
GSE23114_WT_VS_SLE2C1_MOUSE_SPLEEN_B1A_BCELL_DN	0	0	0	0	0	0	0.955337	0	0	0	0	0	0	0	0
GSE43955_1H_VS_60H_ACT_CD4_TCELL_UP	0	0	0	0	0	0	0.955337	0	0	0	0	0	0	0	0
GSE1925_CTRL_VS_IFNG_PRIMED_MACROPHAGE_24H_IFNG_STIM_DN	0	0	0	0	0	0	0.920533	0	0	0	0	0	0	0	0
GSE8621_LPS_PRIMED_UNSTIM_VS_LPS_PRIMED_AND_LPS_STIM_MACROPHAGE_UP	0	0	0	0	0	0	0.920533	0	0	0	0	0	0	0	0
GSE37532_TREG_VS_TCONV_CD4_TCELL_FROM_LN_DN	0	0	0	0	0	0	0.920533	0	0	0	0	0	0	0	0
GSE43955_TH0_VS_TGFB_IL6_TH17_ACT_CD4_TCELL_20H_DN	0	0	0	0	0	0	0.920533	0	0	0	0	0	0	0	0
GSE17721_LPS_VS_PAM3CSK4_8H_BMDC_UP	0	0	0	0	0	0	0.885957	0	0	0	0	0	0	0	0
GSE339_EX_VIVO_VS_IN_CULTURE_CD4POS_DC_UP	0	0	0	0	0	0	0.885957	0	0	0	0	0.805464	0	0	0
GSE9650_EXHAUSTED_VS_MEMORY_CD8_TCELL_DN	0	0	0	0	0	0	0.885957	0	0	0	0	0	0	0	0
GSE34156_NOD2_LIGAND_VS_TLR1_TLR2_LIGAND_6H_TREATED_MONOCYTE_UP	0	0	0	0	0	0	0.885957	0	0	0	0	0	0	0	0
GSE17721_LPS_VS_GARDIQUIMOD_4H_BMDC_UP	0	0	0	0	0	0	0.851732	0	0	0	0	0	0	0	0
GSE19198_1H_VS_6H_IL21_TREATED_TCELL_DN	0	0	0	0	0	0	0.81758	0	0	0	0	0.757527	0	0	0
GSE22886_NAIVE_BCELL_VS_DC_DN	0	0	0	0	0	0	0.75028	0	0	0	0	0	0	0	0
HALLMARK_KRAS_SIGNALING_UP	0	0	0	0	0	0	0.717002	0	0	0	0	0	0	0	0
GSE41867_DAY8_EFFECTOR_VS_DAY30_EXHAUSTED_CD8_TCELL_LCMV_CLONE13_DN	0	0	0	0	0	0	0.717002	0	0	0	0	0	0	0	0
GSE17721_LPS_VS_GARDIQUIMOD_2H_BMDC_UP	0	0	0	0	0	0	0.684033	0	0	0	0	0	0	0	0
HALLMARK_P53_PATHWAY	0	0	0	0	0	0	0.586908	0	0	0	0	3.74102	0	0	0
HALLMARK_HYPOXIA	0	0	0	0	0	0	0.555175	0	0	0	0	0	0	0	0
RODWELL_AGING_KIDNEY_NO_BLOOD_UP	0	0	0	0	0	0	0.523415	0	0	0	0	0	0	0	0
BHAT_ESR1_TARGETS_NOT_VIA_AKT1_UP	0	0	0	0	0	0	0.460971	0	0	0	0	0	0	0	0
CTGAGCC,MIR-24	0	0	0	0	0	0	0.1044	0	0	0	0	0	0	0	0
ZHANG_TLX_TARGETS_36HR_UP	0	0	0	0	0	0	0.1044	0	0	0	0.433242	0.251215	0	0	0
REACTOME_METABOLISM_OF_CARBOHYDRATES	0	0	0	0	0	0	0	0	0	0	0	0	0	0	0
GO_INTRINSIC_COMPONENT_OF_ORGANELLE_MEMBRANE	0	0	0	0	0	0	0	0	0	0	0	0	0	0	0
V$AREB6_04	0	0	0	0	0	0	0	0	0	0	0	0	0	0	0
MIYAGAWA_TARGETS_OF_EWSR1_ETS_FUSIONS_UP	0	0	0	0	0	0	0	0	0	0	0	0	0	0	0
V$NFKB_C	0	0	0	0	0	0	0	0	0	0	0	0	0	0	0
GO_CELLULAR_RESPONSE_TO_ABIOTIC_STIMULUS	0	0	0	0	0	0	0	0	0	0	0	0	0	0	0
V$USF_02	0	0	0	0	0	0	0	0	0	0	0	0	0	0	0
MCBRYAN_PUBERTAL_BREAST_4_5WK_UP	0	0	0	0	0	0	0	2.47975	0	0	0	0	0.403906	0	0
GO_REGULATION_OF_HOMOTYPIC_CELL_CELL_ADHESION	0	0	0	0	0	0	0	0	0	0	0	1.26324	0	0	0
GO_APOPTOTIC_SIGNALING_PATHWAY	0	0	0	0	0	0	0	0	0	0	0	0	0	0	0
CHANDRAN_METASTASIS_DN	0	0	0	0	0	0	0	0	0	0	0	0	0	0	0
WANG_MLL_TARGETS	0	0	0	0	0	0	0	0	0	0	0	0	0	0	0
GO_HEMOSTASIS	0	0	0	0	0	0	0	0	0	0	0	0	0	0	0
KINSEY_TARGETS_OF_EWSR1_FLII_FUSION_DN	0	0	0	0	0	0	0	0	0	0	0	2.15981	0	0	0
GRESHOCK_CANCER_COPY_NUMBER_UP	0	0	0	0	0	0	0	0	0	0	0	0	0	0	0
GO_RESPONSE_TO_METAL_ION	0	0	0	0	0	0	0	0	0	0	0	0	0	0	0
GO_DEVELOPMENTAL_GROWTH	0	0	0	0	0	0	0	0	0	0	0	0	0	0	0
KEGG_PATHWAYS_IN_CANCER	0	0	0	0	0	0	0	0	0	0	0	0	0	0	0
GO_POSITIVE_REGULATION_OF_CELLULAR_PROTEIN_LOCALIZATION	0	0	0	0	0	0	0	0	0	0	0	0	0	0	0
CATTGTYY_V$SOX9_B1	0	0	0	0	0	0	0	0	0	0	0	0	0	0	0
PEDRIOLI_MIR31_TARGETS_DN	0	0	0	0	0	0	0	0	0	0	0	0	0	0	0
LINDGREN_BLADDER_CANCER_CLUSTER_1_DN	0	0	0	0	0	0	0	0	0	0	0	0	0	0	0
GO_REGULATION_OF_PROTEIN_COMPLEX_ASSEMBLY	0	0	0	0	0	0	0	0	0	0	0	0	0	0	0
GO_NCRNA_PROCESSING	0	0	0	0	0	0	0	0	0	0	0	0	0	0	0
GO_ENDOSOMAL_PART	0	0	0	0	0	0	0	0	0	0	0	0	0	0	0
TGGNNNNNNKCCAR_UNKNOWN	0	0	0	0	0	0	0	0	0	0	0	0	0	0	0
RIGGI_EWING_SARCOMA_PROGENITOR_UP	0	0	0	0	0	0	0	0	0	0	0	0	1.0103	0	0
GO_RESPONSE_TO_RADIATION	0	0	0	0	0	0	0	0	0	0	0	0	0	0	0
MODULE_179	0	0	0	0	0	0	0	0	0	0	0	0	0	0	0
MODULE_37	0	0	0	0	0	0	0	0	0	0	0	0	0	0	0
SCHAEFFER_PROSTATE_DEVELOPMENT_48HR_DN	0	0	0	0	0	0	0	0	0	0	0	0	0	0	0
GO_POSTTRANSCRIPTIONAL_REGULATION_OF_GENE_EXPRESSION	0	0	0	0	0	0	0	0	0	0	0	0	0	0	0
SCHAEFFER_PROSTATE_DEVELOPMENT_48HR_UP	0	0	0	0	0	0	0	0	0	0	0	0	0.20477	0	0
STARK_PREFRONTAL_CORTEX_22Q11_DELETION_DN	0	0	0	0	0	0	0	0	0	0	0	0	0	0	0
GO_REGULATION_OF_CYTOSKELETON_ORGANIZATION	0	0	0	0	0	0	0	0	0	0	0	0	0	0	0
BONOME_OVARIAN_CANCER_SURVIVAL_SUBOPTIMAL_DEBULKING	0	0	0	0	0	0	0	0	0	0	0	0	0	0	0
TGGTGCT,MIR-29A,MIR-29B,MIR-29C	0	0	0	0	0	0	0	0	0	0	0	0	0	0	0
MODULE_95	0	0	0	0	0	0	0	0	0	0	0	0	0	0	0
TGCCTTA,MIR-124A	0	0	0	0	0	0	0	0	0	0	0	0	1.02358	0	0
GO_REGULATION_OF_CELL_PROJECTION_ORGANIZATION	0	0	0	0	0	0	0	0.145359	0	0	0	0	0	0	0
GCACTTT,MIR-17-5P,MIR-20A,MIR-106A,MIR-106B,MIR-20B,MIR-519D	0	0	0	0	0	0	0	0	0	0	0	0	0	0	0
GO_LIPID_BINDING	0	0	0	0	0	0	0	0	0	0	0	0	0	0	0
TAATTA_V$CHX10_01	0	0	0	0	0	0	0	0	0	0	0	0	0	0	0
GO_CATION_TRANSPORT	0	0	0	0	0	0	0	0	0	0	0	0	0	0	0
ICHIBA_GRAFT_VERSUS_HOST_DISEASE_D7_UP	0	0	0	0	0	0	5.11896	0	0	0	0	0	0	0	0
ALTEMEIER_RESPONSE_TO_LPS_WITH_MECHANICAL_VENTILATION	0	0	0	0	0	0	3.57737	0	0	0	0	1.28159	0	0	0
MODULE_223	0	0	0	0	0	0	2.86005	0	0	0	0	0	0	0	0
MODULE_122	0	0	0	0	0	0	2.28063	0	0	0	0	0.549511	0	0	0
GSE32255_UNSTIM_VS_4H_LPS_STIM_DC_DN	0	0	0	0	0	0	1.99142	0	0	0	0	0	0	0	0
GSE17974_IL4_AND_ANTI_IL12_VS_UNTREATED_4H_ACT_CD4_TCELL_UP	0	0	0	0	0	0	1.85306	0	0	0	0	0	0	0	0
GO_NEGATIVE_REGULATION_OF_RESPONSE_TO_WOUNDING	0	0	0	0	0	0	1.76318	0	0	0	0	0	0	0	0
GSE2128_CTRL_VS_MIMETOPE_NEGATIVE_SELECTION_DP_THYMOCYTE_NOD_DN	0	0	0	0	0	0	1.63125	0	0	0	0	0	0	0	0
GSE21360_SECONDARY_VS_TERTIARY_MEMORY_CD8_TCELL_DN	0	0	0	0	0	0	1.46162	0	0	0	0	0	0	0	0
GSE2770_IL4_ACT_VS_ACT_CD4_TCELL_6H_UP	0	0	0	0	0	0	1.42011	0	0	0	0	0	0	0	0
GSE34205_RSV_VS_FLU_INF_INFANT_PBMC_DN	0	0	0	0	0	0	1.379	0	0	0	0	0	0	0	0
HALLMARK_APOPTOSIS	0	0	0	0	0	0	1.379	0	0	0	0	3.29803	0	0	0
GSE25123_WT_VS_PPARG_KO_MACROPHAGE_UP	0	0	0	0	0	0	1.258	0	0	0	0	0	0	0	0
GSE25088_WT_VS_STAT6_KO_MACROPHAGE_ROSIGLITAZONE_AND_IL4_STIM_DN	0	0	0	0	0	0	1.258	0	0	0	0	0	0	0	0
GSE42021_CD24HI_VS_CD24INT_TREG_THYMUS_DN	0	0	0	0	0	0	1.258	0	0	0	0	0	0	0	0
GSE37416_0H_VS_24H_F_TULARENSIS_LVS_NEUTROPHIL_UP	0	0	0	0	0	0	1.21838	0	0	0	0	0	0	0	0
GO_POSITIVE_REGULATION_OF_I_KAPPAB_KINASE_NF_KAPPAB_SIGNALING	0	0	0	0	0	0	1.14024	0	0	0	0	0	0	0	0
GSE6259_CD4_TCELL_VS_CD8_TCELL_DN	0	0	0	0	0	0	1.10155	0	0	0	0	0	0	0	0
RPS14_DN.V1_UP	0	0	0	0	0	0	1.0633	0	0	0	0	0	0	0	0
GSE22886_DC_VS_MONOCYTE_DN	0	2.48285	0	0	0	0	1.0633	0	0	0	0	0	0	0	0
GSE2770_TGFB_AND_IL4_ACT_VS_ACT_CD4_TCELL_48H_DN	0	0	0	0	0	0	1.0633	0	0	0	0	0	0	0	0
GSE11057_CD4_EFF_MEM_VS_PBMC_DN	0	0	0	0	0	0	1.02561	0	0	0	0	1.32368	0	0	0
GSE22611_NOD2_TRANSDUCED_VS_CTRL_HEK293T_STIMULATED_WITH_MDP_2H_UP	0	0	0	0	0	0	0.988147	0	0	0	0	0	0	0	0
GSE20727_ROS_INH_VS_ROS_INH_AND_DNFB_ALLERGEN_TREATED_DC_UP	0	0	0	0	0	0	0.988147	0	0	0	0	0	0	0	0
GSE36888_UNTREATED_VS_IL2_TREATED_STAT5_AB_KNOCKIN_TCELL_2H_UP	0	0	0	0	0	0	0.950942	0	0	0	0	0	0	0	0
GSE37416_0H_VS_48H_F_TULARENSIS_LVS_NEUTROPHIL_UP	0	0	0	0	0	0	0.914085	0	0	0	0	0	0	0	0
GSE6259_33D1_POS_VS_DEC205_POS_FLT3L_INDUCED_SPLENIC_DC_UP	0	0	0	0	0	0	0.914085	0	0	0	0	0	0	0	0
GSE10325_CD4_TCELL_VS_MYELOID_DN	0	0	0	0	0	0	0.877547	0	0	0	0	0	0	0	0
GSE20754_WT_VS_TCF1_KO_MEMORY_CD8_TCELL_UP	0	0	0	0	0	0	0.877547	0	0	0	0	0	0	0	0
GSE24574_BCL6_HIGH_TFH_VS_NAIVE_CD4_TCELL_UP	0	0	0	0.594354	0	0	0.877547	0	0	0	0	0	0	0	0
GSE22886_DAY1_VS_DAY7_MONOCYTE_IN_CULTURE_UP	0	0	0	0	0	0	0.841275	0	0	0	0	0	0	0	0
GSE8921_UNSTIM_VS_TLR1_2_STIM_MONOCYTE_3H_DN	0	0	0	0	0	0	0.805265	0	0	0	0	0	0	0	0
GSE21774_CD62L_POS_CD56_BRIGHT_VS_CD62L_NEG_CD56_DIM_NK_CELL_UP	0	0	0	0	0	0	0.769561	0	0	0	0	0	0	0	0
GSE32986_UNSTIM_VS_GMCSF_AND_CURDLAN_HIGHDOSE_STIM_DC_UP	0	0	0	0	0	0	0.769561	0	0	0	0	0	0	0	0
GSE34515_CD16_POS_MONOCYTE_VS_DC_DN	0	0	0	0	0	0	0.769561	0	0	0	0	0	0	0	0
GSE7460_CTRL_VS_TGFB_TREATED_ACT_FOXP3_MUT_TCONV_DN	0	0	0	0	0	0	0.734285	0	0	0	0	0	0	0	0
GSE23695_CD57_POS_VS_NEG_NK_CELL_UP	0	0	0	0	0	0	0.734285	0	0	0	0	0	0	0	0
GSE41867_DAY6_EFFECTOR_VS_DAY30_MEMORY_CD8_TCELL_LCMV_ARMSTRONG_UP	0	0	0	0	0	0	0.699234	0	0	0	0	0	0	0	0
GSE24634_IL4_VS_CTRL_TREATED_NAIVE_CD4_TCELL_DAY5_UP	0	0	0	0	0	0	0.664504	0	0	0	0	1.05486	0	0	0
GSE28783_CTRL_ANTI_MIR_VS_UNTREATED_ATHEROSCLEROSIS_MACROPHAGE_DN	0	0	0	0	0	0	0.664504	0	0	0	0	0	0	0	0
GSE40666_UNTREATED_VS_IFNA_STIM_EFFECTOR_CD8_TCELL_90MIN_UP	0	0	0	0	0	0	0.664504	0	0	0	0	0	0	0	0
GSE27786_NKCELL_VS_NKTCELL_UP	0	0	0	0	0	0	0.63014	0	0	0	0	0	0	0	0
GSE37301_HEMATOPOIETIC_STEM_CELL_VS_RAG2_KO_NK_CELL_DN	0	0	0	0	0	0	0.63014	0	0	0	0	0	0	0	0
GSE37532_WT_VS_PPARG_KO_VISCERAL_ADIPOSE_TISSUE_TCONV_UP	0	0	0	0	0	0	0.63014	0	0	0	0	0	0	0	0
GSE19888_CTRL_VS_TCELL_MEMBRANES_ACT_MAST_CELL_PRETREAT_A3R_INH_DN	0	0	0	0	0	0	0.59619	0	0	0	0	0	0	0	0
GSE25085_FETAL_BM_VS_ADULT_BM_SP4_THYMIC_IMPLANT_UP	0	0	0	0	0	0	0.59619	0	0	0	0	1.78132	0	0	0
GSE21063_CTRL_VS_ANTI_IGM_STIM_BCELL_NFATC1_KO_16H_UP	0	0	0	0	0	0	0.59619	0	0	0	0	0	0	0	0
GSE43955_TH0_VS_TGFB_IL6_TH17_ACT_CD4_TCELL_30H_DN	0	0	0	0	0	0	0.59619	0	0	0	0	0	0	0	0
GSE15324_NAIVE_VS_ACTIVATED_ELF4_KO_CD8_TCELL_UP	0	0	0	0	0	0	0.562475	0	0	0	0	0	0	0	0
GSE2826_WT_VS_BTK_KO_BCELL_DN	0	0	0	0	0	0	0.562475	0	0	0	0	0.24317	0	0	0
GSE8835_CD4_VS_CD8_TCELL_CLL_PATIENT_DN	0	0	0	0	0	0	0.562475	0	0	0	0	0.24317	0	0	0
GSE5589_IL6_KO_VS_IL10_KO_LPS_AND_IL10_STIM_MACROPHAGE_180MIN_UP	0	0	0	0	0	0	0.562475	0	0	0	0	0	0	0	0
GSE22935_UNSTIM_VS_12H_MBOVIS_BCG_STIM_MACROPHAGE_DN	0	0	0	0	0	0	0.562475	0	0	0	0	0	0	0	0
GSE37532_TREG_VS_TCONV_PPARG_KO_CD4_TCELL_FROM_VISCERAL_ADIPOSE_TISSUE_UP	0	0	0	0	0	0	0.562475	0	0	0	0	0	0	0	0
GSE22103_UNSTIM_VS_LPS_STIM_NEUTROPHIL_DN	0	0	0	0	0	0	0.528917	0	0	0	0	0.220827	0	0	0
GSE26030_TH1_VS_TH17_DAY5_POST_POLARIZATION_DN	0	0	0	0	0	0	0.528917	0	0	0	0	0	0	0	0
GSE40666_UNTREATED_VS_IFNA_STIM_STAT4_KO_EFFECTOR_CD8_TCELL_90MIN_UP	0	0	0	0	0	0	0.528917	0	0	0	0	0	0	0	0
GSE43863_DAY6_EFF_VS_DAY150_MEM_LY6C_INT_CXCR5POS_CD4_TCELL_DN	0	0	0	0	0	0	0.528917	0	0	0	0	0	0	0	0
GSE29618_BCELL_VS_PDC_DN	0	0	0	0	0	0	0.495588	0	0	0	0	0.198423	0	0	0
GSE39820_CTRL_VS_TGFBETA3_IL6_IL23A_CD4_TCELL_DN	0	0	0	0	0	0	0.495588	0	0	0	0	0	0	0	0
GSE5099_MONOCYTE_VS_CLASSICAL_M1_MACROPHAGE_UP	0	0	0	0	0	0	0.495588	0	0	0	0	0	0	0	0
GSE16385_MONOCYTE_VS_12H_IL4_TREATED_MACROPHAGE_DN	0	0	0	0	0	0	0.495588	0	0	0	0	0	0	0	0
GSE22443_NAIVE_VS_ACT_AND_IL2_TREATED_CD8_TCELL_DN	0	0	0	0	0	0	0.495588	0	0	0	0	0	0	0	0
GSE24142_EARLY_THYMIC_PROGENITOR_VS_DN3_THYMOCYTE_UP	0	0	0	0	0	0	0.462758	0	0	0	0	0	0	0	0
HALLMARK_INTERFERON_GAMMA_RESPONSE	0	0	0	0	0	0	0.462758	0	0	0	0	0	0	0	0
GSE5503_PLN_DC_VS_SPLEEN_DC_ACTIVATED_ALLOGENIC_TCELL_DN	0	0	0	0	0	0	0.462758	0	0	0	0	0	0	0	0
GSE22033_UNTREATED_VS_ROSIGLITAZONE_TREATED_MEF_UP	0	0	0	0	0	0	0.462758	0	0	0	0	0	0	0	0
GSE26030_UNSTIM_VS_RESTIM_TH1_DAY15_POST_POLARIZATION_DN	0	0	0	0	0	0	0.462758	0	0	0	0	0.176281	0	0	0
GSE43955_TH0_VS_TGFB_IL6_IL23_TH17_ACT_CD4_TCELL_52H_DN	0	0	0	0	0	0	0.462758	0	0	0	0	0.903235	0	0	0
GSE46606_IRF4MID_VS_WT_CD40L_IL2_IL5_DAY1_STIMULATED_BCELL_DN	0	0	0	0	0	0	0.462758	0	0	0	0	0	0	0	0
GSE15930_STIM_VS_STIM_AND_TRICHOSTATINA_48H_CD8_T_CELL_DN	0	0	0	0	0	0	0.430051	0	0	0	0	0	0	0	0
GSE17721_CTRL_VS_LPS_8H_BMDC_UP	0	0	0	0	0	0	0.430051	0	0	0	0	0	0	0	0
GSE19401_UNSTIM_VS_RETINOIC_ACID_AND_PAM2CSK4_STIM_FOLLICULAR_DC_UP	0	0	0	0	0	0	0.430051	0	0	0	0	0	0	0	0
GSE23568_CTRL_TRANSDUCED_VS_WT_CD8_TCELL_DN	0	0	0	0	0	0	0.430051	0	0	0	0	0	0	0	0
GSE32034_LY6C_HIGH_VS_LOW_ROSIGLIZATONE_TREATED_MONOCYTE_DN	0	0	0	0	0	0	0.430051	0	0	0	0	0	0	0	0
GSE40273_EOS_KO_VS_WT_TREG_UP	0	0	0.921314	0	0	0	0.430051	0	0	0	0	0	0	0	0
GSE43955_TH0_VS_TGFB_IL6_TH17_ACT_CD4_TCELL_52H_UP	0	0	0	0	0	0	0.430051	0	0	0	0	0.154297	0	0	0
GSE41176_UNSTIM_VS_ANTI_IGM_STIM_BCELL_24H_DN	0	0	0	0	0	0	0.430051	0	0	0	0	0	0	0	0
GSE36392_TYPE_2_MYELOID_VS_NEUTROPHIL_IL25_TREATED_LUNG_DN	0	0	0	0	0	0	0.397662	0	0	0	0	0	0	0	0
GSE22935_WT_VS_MYD88_KO_MACROPHAGE_48H_MBOVIS_BCG_STIM_DN	0	0	0	0	0	0	0.397662	0	0	0	0	0	0	0	0
GSE31622_WT_VS_KLF3_KO_BCELL_DN	0	0	0	0	0	0	0.397662	0	0	0	0	0	0	0	0
GSE43956_WT_VS_SGK1_KO_TH17_DIFFERENTIATED_CD4_TCELL_DN	0	0	0	0	0	0	0.397662	0	0	0	0	0	0	0	0
GSE9650_GP33_VS_GP276_LCMV_SPECIFIC_EXHAUSTED_CD8_TCELL_UP	0	0	0	0	0	0	0.365513	0	0	0	0	0	0	0	0
GSE15330_HSC_VS_MEGAKARYOCYTE_ERYTHROID_PROGENITOR_IKAROS_KO_UP	0	0	0	0	0	0	0.365513	0	0	0	0	0.829645	0	0	0
GSE2770_UNTREATED_VS_IL4_TREATED_ACT_CD4_TCELL_48H_UP	0	0	0	0	0	0	0.333552	0	0	0	0	0	0	0	0
GSE5589_LPS_VS_LPS_AND_IL10_STIM_IL10_KO_MACROPHAGE_180MIN_DN	0	0	0	0	0	0	0.333552	0	0	0	0	0	0	0	0
GSE12392_CD8A_POS_VS_NEG_SPLEEN_IFNB_KO_DC_DN	0	0	0	0	0	0	0.333552	0	0	0	0	0	0	0	0
GSE39152_BRAIN_VS_SPLEEN_CD103_NEG_MEMORY_CD8_TCELL_DN	0	0	0	0	0	0	0.333552	0	0	0	0	0	0	0	0
GSE9316_IL6_KO_VS_IFNG_KO_INVIVO_EXPANDED_CD4_TCELL_UP	0	0	0	0	0	0	0.3018	0	0	0	0	0	0	0	0
GSE9960_GRAM_POS_VS_GRAM_NEG_AND_POS_SEPSIS_PBMC_UP	0	0	0	0	0	0	0.3018	0	0	0	0	0	0	0	0
GSE1448_CTRL_VS_ANTI_VBETA5_DP_THYMOCYTE_DN	0	0	0	0	0	0	0.270455	0	0	0	0	0	0	0	0
GSE3337_CTRL_VS_16H_IFNG_IN_CD8POS_DC_UP	0	0	0	0	0	0	0.270455	0	0	0	0	0	0	0	0
GSE339_CD4POS_VS_CD8POS_DC_IN_CULTURE_DN	0	0	0	0	0	0	0.208245	0	0	0	0	0	0	0	0
GSE15330_LYMPHOID_MULTIPOTENT_VS_MEGAKARYOCYTE_ERYTHROID_PROGENITOR_DN	0	0	0	0	0	0	0.177701	0	0	0	0	0	0	0	0
HALLMARK_IL2_STAT5_SIGNALING	0	0	0	0	0	0	0.147352	0	0	0	0	0	0	0	0
UDAYAKUMAR_MED1_TARGETS_DN	0	0	0	0	0	0	0	1.32812	0	0	0	0.251215	0	0	0
MODULE_47	0	0	0	0	0	0	0	0	0	0	0	0	0	0	0
AGUIRRE_PANCREATIC_CANCER_COPY_NUMBER_DN	0	0	0	0	0	0	0	0	0	0	0	0	0	0	0
V$ATF4_Q2	0	0	0	0	0	0	0	0	0	0	0	0	0	0	0
V$TFIIA_Q6	0	0	0	0	0	0	0	0	0	0	0	0	0	0	0
HELLER_SILENCED_BY_METHYLATION_UP	0	0	0	0	0	0	0	0	0	0	0	0	0	0	0
ONDER_CDH1_TARGETS_2_UP	0	0	0	0	0	0	0	0	0	0	0	0	0	0	0
V$BACH2_01	0	0	0	0	0	0	0	0	0	0	0	0	0	0	0
GO_AGING	0	0	0	0	0	0	0	0	0	0	0	0	0	0	0
V$EGR_Q6	0	0	0	0	0	0	0	0	0	0	0	0	0	0	0
PASQUALUCCI_LYMPHOMA_BY_GC_STAGE_UP	0	0	0	0	0	0	0	0	0	0	0	0	0	0	0
DEBIASI_APOPTOSIS_BY_REOVIRUS_INFECTION_DN	0	0	0	0	0	0	0	0.372959	0	0	0	1.32567	0	0	0
GO_REGULATION_OF_LIPID_METABOLIC_PROCESS	0	0	0.261828	0	0	0	0	0	0	0	0	0	0	0	0
SHEN_SMARCA2_TARGETS_DN	0	0	0	0	0	0	0	0	0	0	0	0	0	0	0
GO_MUSCLE_SYSTEM_PROCESS	0	0	0	0	0	0	0	0	0	0	0	0	0	0	0
GO_RESPONSE_TO_ACID_CHEMICAL	0	0	0	0	0	0	0	0	0	0	0	1.20026	0	0	0
GO_ORGANONITROGEN_COMPOUND_CATABOLIC_PROCESS	0	0	0	0	0	0	0	0	0	0	0	0	0.897404	0	0
GO_SMALL_GTPASE_MEDIATED_SIGNAL_TRANSDUCTION	0	0	0	0	0	0	0	0	0	0	0	0	0	0	0
GO_SULFUR_COMPOUND_METABOLIC_PROCESS	0	0	0	0	0	0	0	0	0	0	0	0	0	0	0
GO_PHOSPHOLIPID_METABOLIC_PROCESS	0	0	0	0	0	0	0	0	0	0	0	0	0	0	0
GO_GLYCEROLIPID_METABOLIC_PROCESS	0	0	0	0	0	0	0	0	0	0	0	0	0	0	0
WGGAATGY_V$TEF1_Q6	0	0	0	0	0	0	0	0	0	0	0	0	0	0	0
GO_NEGATIVE_REGULATION_OF_HYDROLASE_ACTIVITY	0	0	0	0	0	0	0	0	0	0	0	0	0	0	0
GO_AUTOPHAGY	0	0	0	0	0	0	0	0	0	0	0	0	0	0	0
GO_REGULATION_OF_INTRACELLULAR_PROTEIN_TRANSPORT	0	0	0	0	0	0	0	0	0	0	0	0	0	0	0
GO_POSITIVE_REGULATION_OF_PROTEOLYSIS	0	0	0	0	0	0	0	0	0	0	0	0	0	0	0
MODULE_459	0	0	0	0	0	0	0	0	0	0	0	0	0	0	0
MODULE_378	0	0	0	0	0	0	0	0	0	0	0	0	0	0	0
BERENJENO_TRANSFORMED_BY_RHOA_DN	0	0	0	0	0	0	0	0.0265541	0	0	0	0	1.29589	0	0
MODULE_317	0	0	0	0	0	0	0	0	0	0	0	0	0	0	0
GO_REGULATION_OF_CELL_GROWTH	0	0	0	0	0	0	0	0	0	0	0	0	0	0	0
GO_REGULATION_OF_PROTEIN_CATABOLIC_PROCESS	0	0	0.204407	0	0	0	0	0	0	0	0	0	0	0	0
MODULE_255	0	0	0	0	0	0	0	0	0	0	0	0	0	0	0
REACTOME_TRANSMEMBRANE_TRANSPORT_OF_SMALL_MOLECULES	0	0	0.013216	0	0	0	0	0	0	0	0	0	0	0	0
GO_SIGNAL_TRANSDUCTION_BY_PROTEIN_PHOSPHORYLATION	0	0	0	0	0	0	0	0	0	0	0	0	0	0	0
GO_NEGATIVE_REGULATION_OF_CELL_CYCLE	0	0	0	0	0	0	0	0	0	0	0	0	0	0	0
MOOTHA_PGC	0	0	0	0	0	0	0	2.68525	0	0	0	0	4.89584	0	0
GAZDA_DIAMOND_BLACKFAN_ANEMIA_ERYTHROID_DN	0	0	0	0	0	0	0	0	0	0	0	0	0	0	0
GO_DNA_REPAIR	0	0	0	0	0	0	0	0	0	0	0	0	0	0	0
MOOTHA_MITOCHONDRIA	0	0	0	0	0	0	0	7.29757	0	0	0	0	0	0	0
GO_NITROGEN_COMPOUND_TRANSPORT	0	0	0	0	0	0	0	0	0	0	0	0	0	0	0
GO_BEHAVIOR	0	0	0	0	0	0	0	0	0	0	0	0	0	0	0
GO_NEURON_PROJECTION_DEVELOPMENT	0	0	0	0	0	0	0	0	0	0	0	0	0	0	0
MODULE_66	0	0	0	0	0	0	0	1.42203	0	0	0	0	3.32017	0	0
GO_REGULATION_OF_NEURON_DIFFERENTIATION	0	0	0	0	0	0	0	1.18467	0	0	0	0	0	0	0
GO_MRNA_METABOLIC_PROCESS	0	0	0	0	0	0	0	0	0	0	0	0	0	0	0
GO_MICROTUBULE_ORGANIZING_CENTER	0	0	0	0	0	0	0	0	0	0	0	0	0	0	0
GO_SEXUAL_REPRODUCTION	0	0	0	0	0	0	0	0	0	0	0	0	0	0	0
GO_MITOCHONDRIAL_ENVELOPE	0	0	1.08437	0	0	0	0	5.89864	0	0	0	0	0.191496	0	0
CREIGHTON_ENDOCRINE_THERAPY_RESISTANCE_3	0	0	0	0	0	0	0	0	0	0	0	0	0	0	0
JOHNSTONE_PARVB_TARGETS_3_DN	0	0	0	0	0	0	0	0	0	0	0	0	0	0	0
DACOSTA_UV_RESPONSE_VIA_ERCC3_DN	0	0	0	0	0	0	0	0	0	0	0	0	0	0	0
BLALOCK_ALZHEIMERS_DISEASE_DN	0	0	0.0634043	0	0	0	0	3.59419	0	0	0	0	8.14979	0	0
GO_REGULATION_OF_TYPE_I_INTERFERON_PRODUCTION	0	0	0	0	0	0	3.23537	0	0	0	0	0	0	0	0
BROWN_MYELOID_CELL_DEVELOPMENT_UP	0	0	0	0	0	0	1.60053	0	0	0	0	0.549511	0	0	0
GSE17974_0H_VS_24H_IN_VITRO_ACT_CD4_TCELL_UP	0	0	0	0	0	0	1.46513	0	0	0	0	0	0	0	0
GSE21063_CTRL_VS_ANTI_IGM_STIM_BCELL_8H_UP	0	0	0	0	0	0	1.16439	0	0	0	0	0	0	0	0
PETROVA_ENDOTHELIUM_LYMPHATIC_VS_BLOOD_DN	0	0	0	0	0	0	1.08197	0	0	0	0	0	0	0	0
GO_CELLULAR_RESPONSE_TO_BIOTIC_STIMULUS	0	0	0	0	0	0	0.9618	0	0	0	0	1.73667	0	0	0
GSE17974_0.5H_VS_72H_UNTREATED_IN_VITRO_CD4_TCELL_UP	0	0	0	0	0	0	0.883636	0	0	0	0	0	0	0	0
GSE21033_1H_VS_24H_POLYIC_STIM_DC_DN	0	0	0	0	0	0	0.80664	0	0	0	0	0	0	0	0
GSE14415_ACT_VS_CTRL_NATURAL_TREG_DN	0	0	0	0	0	0	0.76879	0	0	0	0	0	0	0	0
GSE36888_UNTREATED_VS_IL2_TREATED_TCELL_6H_UP	0	0	0	0	0	0	0.76879	0	0	0	0	0.031084	0	0	0
ELVIDGE_HYPOXIA_UP	0	0	0	0	0	0	0.694039	0	0	0	0	0	0	0	0
GSE3920_UNTREATED_VS_IFNA_TREATED_FIBROBLAST_UP	0	0	0	0	0	0	0.694039	0	0	0	0	0	0	0	0
GSE32901_NAIVE_VS_TH1_CD4_TCELL_DN	0	0	0	0	0	0	0.694039	0	0	0	0	0	0	0	0
ESC_J1_UP_EARLY.V1_DN	0	0	0	0	0	0	0.657229	0	0	0	0	0	0	0	0
GSE21360_NAIVE_VS_SECONDARY_MEMORY_CD8_TCELL_DN	0	0	0	0	0	0	0.657229	0	0	0	0	0	0	0	0
SNF5_DN.V1_UP	0	0	0	0	0	0	0.620854	0	0	0	0	0	0	0	0
GSE29618_BCELL_VS_PDC_UP	0	0	0	0	0	0	0.620854	0	0	0	0	3.1556	0	0	0
TONKS_TARGETS_OF_RUNX1_RUNX1T1_FUSION_HSC_DN	0	0.0140791	0	0	0	0	0.584862	0	0	0	0	0	0	0	0
GSE12845_PRE_GC_VS_DARKZONE_GC_TONSIL_BCELL_UP	0	0	0	0	0	0	0.584862	0	0	0	0	0	0	0	0
GSE34156_UNTREATED_VS_6H_TLR1_TLR2_LIGAND_TREATED_MONOCYTE_DN	0	0	0	0	0	0	0.549223	0	0	0	0	0	0	0	0
GSE3982_EOSINOPHIL_VS_NEUTROPHIL_DN	0	0	0	0	0	0	0.513634	0	0	0	0	0	0	0	0
GSE17974_CTRL_VS_ACT_IL4_AND_ANTI_IL12_2H_CD4_TCELL_DN	0	0	0	0	0	0	0.478439	0	0	0	0	0	0	0	0
GSE3982_EFF_MEMORY_CD4_TCELL_VS_NKCELL_DN	0	0	0	0	0	0	0.478439	0	0	0	0	0	0	0	0
GSE7218_IGM_VS_IGG_SIGNAL_THGOUGH_ANTIGEN_BCELL_DN	0	0	0	0	0	0	0.478439	0	0	0	0	0	0	0	0
GSE32986_UNSTIM_VS_CURDLAN_HIGHDOSE_STIM_DC_DN	0	0	0	0	0	0	0.478439	0	0	0	0	0	0	0	0
GSE30971_CTRL_VS_LPS_STIM_MACROPHAGE_WBP7_HET_2H_UP	0	0	0	0	0	0	0.478439	0	0	0	0	0	0	0	0
GSE41867_DAY6_VS_DAY15_LCMV_ARMSTRONG_EFFECTOR_CD8_TCELL_DN	0	0	0	0	0	0	0.478439	0	0	0	0	0	0	0	0
GSE2706_UNSTIM_VS_8H_R848_DC_DN	0	0	0	0	0	0	0.443759	0	0	0	0	0	0	0	0
GSE41087_WT_VS_FOXP3_MUT_ANTI_CD3_CD28_STIM_CD4_TCELL_UP	0	0	0	0	0	0	0.443759	0	0	0	0	0	0	0	0
DAVICIONI_MOLECULAR_ARMS_VS_ERMS_DN	0	0	0	0	0	0	0.375028	0	0	0	0	0	0	0	0
GSE13485_CTRL_VS_DAY7_YF17D_VACCINE_PBMC_DN	0	0	0	0	0	0	0.375028	0	0	0	0	0	0	0	0
GSE17721_PAM3CSK4_VS_CPG_4H_BMDC_UP	0	0	0	0	0	0	0.375028	0	0	0	0	0	0	0	0
GSE2706_2H_VS_8H_R848_STIM_DC_UP	0	0	0	0	0	0	0.341069	0	0	0	0	1.24091	0	0	0
GSE37532_WT_VS_PPARG_KO_LN_TREG_UP	0	0	0	0	0	0	0.341069	0	0	0	1.07466	0	0	0	0
GSE24634_TEFF_VS_TCONV_DAY3_IN_CULTURE_DN	0	0	0	0	0	0	0.307359	0	0	0	0	2.0137	0	0	0
GSE369_PRE_VS_POST_IL6_INJECTION_IFNG_WT_LIVER_UP	0	0	0	0	0	0	0.273994	0	0	0	0	0	0	0	0
GSE28726_NAIVE_VS_ACTIVATED_NKTCELL_UP	0	0	0	0.577453	0	0	0.273994	0	0	0	0	0	0	0	0
GSE36009_UNSTIM_VS_LPS_STIM_DC_DN	0	0	0	0	0	0	0.273994	0	0	0	0	0	0	0	0
GSE17721_PAM3CSK4_VS_CPG_12H_BMDC_UP	0	0	0	0	0	0	0.240946	0	0	0	0	0	0	0	0
GSE17721_0.5H_VS_4H_GARDIQUIMOD_BMDC_UP	0	0	0	0	0	0	0.240946	0	0	0	0	0	0	0	0
GSE19198_1H_VS_24H_IL21_TREATED_TCELL_DN	0	0	0	0	0	0	0.208136	0	0	0	0	0	0	0	0
GSE27241_WT_VS_RORGT_KO_TH17_POLARIZED_CD4_TCELL_TREATED_WITH_DIGOXIN_DN	0	0	0	0	0	0	0.208136	0	0	0	0	0	0	0	0
GSE43863_TFH_VS_LY6C_INT_CXCR5POS_MEMORY_CD4_TCELL_DN	0	0	0	0	0	0	0.208136	0	0	0	0	0	0	0	0
GSE9988_LOW_LPS_VS_ANTI_TREM1_AND_LPS_MONOCYTE_UP	0	0	0	0	0	0	0.175761	0	0	0	0	0	0	0	0
GSE10273_HIGH_VS_LOW_IL7_TREATED_IRF4_8_NULL_PRE_BCELL_UP	0	0	0	0	0	0	0.175761	0	0	0	0	0	0	0	0
GSE45365_WT_VS_IFNAR_KO_CD8A_DC_DN	0	0	0	0	0	0	0.175761	0	0	0	0	0	0	0	0
GO_RESPONSE_TO_REACTIVE_OXYGEN_SPECIES	0	0	0	0	0	0	0.175761	0	0	0	0	1.10708	0	0	0
GSE3982_NEUTROPHIL_VS_TH2_UP	0	0	0	0	0	0	0.143641	0	0	0	0	0	0	0	0
GSE9988_LPS_VS_CTRL_TREATED_MONOCYTE_DN	0	0	0	0	0	0	0.143641	0	0	0	0	0	0	0	0
GSE557_CIITA_KO_VS_I_AB_KO_DC_UP	0	0	0	0	0	0	0.143641	0	0	0	0	0	0	0	0
GSE40273_GATA1_KO_VS_WT_TREG_UP	0	0	0	0	0	0	0.143641	0	0	0	0	0	0	0	0
GSE41176_WT_VS_TAK1_KO_ANTI_IGM_STIM_BCELL_3H_UP	0	0	0	0	0	0	0.143641	0	0	0	0	0	0	0	0
BILD_MYC_ONCOGENIC_SIGNATURE	0	0	0	0	0	0	0.111674	0	0	0	0	0	0	0	0
GSE24102_GRANULOCYSTIC_MDSC_VS_NEUTROPHIL_DN	0	0	0	0	0	0	0.111674	0	0	0	0	0	0	0	0
GSE24142_EARLY_THYMIC_PROGENITOR_VS_DN3_THYMOCYTE_ADULT_UP	0	0	0	0	0	0	0.111674	0	0	0	0	0	0	0	0
GSE30083_SP3_VS_SP4_THYMOCYTE_DN	0	0	0	0	0	0	0.111674	0	0	0	0	0	0	0	0
GSE37416_0H_VS_12H_F_TULARENSIS_LVS_NEUTROPHIL_UP	0	0	0	0	0	0	0.111674	0	0	0	0	0	0	0	0
GSE2585_CTEC_VS_MTEC_THYMUS_UP	0	0	0	0	0	0	0.111674	0	0	0	0	0	0	0	0
GSE21774_CD62L_POS_CD56_DIM_VS_CD62L_NEG_CD56_DIM_NK_CELL_DN	0	0	0	0	0	0	0.111674	0	0	0	0	0	0	0	0
GSE17721_POLYIC_VS_CPG_12H_BMDC_UP	0	0	0	0	0	0	0.0801055	0	0	0	0	0	0	0	0
GSE40274_FOXP3_VS_FOXP3_AND_PBX1_TRANSDUCED_ACTIVATED_CD4_TCELL_UP	0	0	0	0	0	0	0.0801055	0	0	0	0	0	0	0	0
GSE36826_NORMAL_VS_STAPH_AUREUS_INF_IL1R_KO_SKIN_DN	0	0	0	0	0	0	0.0801055	0	0	0	0	0.288504	0	0	0
GSE45365_HEALTHY_VS_MCMV_INFECTION_CD8A_DC_DN	0	0	0	0	0	0	0.0801055	0	0	0	0	0	0	0	0
GSE17721_CTRL_VS_LPS_12H_BMDC_DN	0	0	0	0	0	0	0.048657	0	0	0	0	0	0	0	0
GSE17721_4H_VS_24H_POLYIC_BMDC_DN	0	0	0	0	0	0	0.048657	0	0	0	0	0	0	0	0
GSE20715_WT_VS_TLR4_KO_LUNG_DN	0	0	0	0	0	0	0.048657	0	0	0	0	0	0	0	0
GSE3982_CTRL_VS_LPS_4H_MAC_DN	0	0	0	0	0	0	0.048657	0	0	0	0	0	0	0	0
GSE15330_HSC_VS_PRO_BCELL_UP	0	0	0	0	0	0	0.048657	0	0	0	0	0	0	0	0
GSE28783_ANTI_MIR33_VS_UNTREATED_ATHEROSCLEROSIS_MACROPHAGE_UP	0	0	0	0	0	0	0.048657	0	0	0	0	0	0	0	0
GSE11961_FOLLICULAR_BCELL_VS_MARGINAL_ZONE_BCELL_DN	0	0	0	0	0	0	0.048657	0	0	0	0	0	0	0	0
PENG_RAPAMYCIN_RESPONSE_UP	0	0	0	0	0	0	0.0178287	0	0	0	0	0	0	0	0
GSE17721_CTRL_VS_POLYIC_8H_BMDC_UP	0	0	0	0	0	0	0.0178287	0	0	0	0	0	0	0	0
GSE26669_CTRL_VS_COSTIM_BLOCK_MLR_CD8_TCELL_DN	0	0	0	0	0	0	0.0178287	0	0	0	0	0	0	0	0
GSE3337_CTRL_VS_16H_IFNG_IN_CD8POS_DC_DN	0	0	0	0	0	0	0.0178287	0	0	0	0	0	0	0	0
GSE360_L_DONOVANI_VS_M_TUBERCULOSIS_DC_DN	0	0	0	0	0	0	0.0178287	0	0	0	0	0	0	0	0
GSE9988_ANTI_TREM1_VS_CTRL_TREATED_MONOCYTES_DN	0	0	0	0	0	0	0.0178287	0	0	0	0	0	0	0	0
GSE22140_HEALTHY_VS_ARTHRITIC_GERMFREE_MOUSE_CD4_TCELL_UP	0	0	0	0	0	0	0.0178287	0	0	0	0	0	0	0	0
GSE36078_WT_VS_IL1R_KO_LUNG_DC_AFTER_AD5_T425A_HEXON_INF_DN	0	0	0	0	0	0	0.0178287	0	0	0	0	0	0	0	0
GSE28737_BCL6_HET_VS_BCL6_KO_FOLLICULAR_BCELL_UP	0	0	0	0	0	0	0.0178287	0	0	0	0	0	0	0	0
GSE41176_UNSTIM_VS_ANTI_IGM_STIM_BCELL_1H_UP	0	0	0	0	0	0	0.0178287	0	0	0	0	0	0	0	0
GSE17721_LPS_VS_CPG_12H_BMDC_DN	0	0	0	0	0	0	0	0	0	0	0	0.95298	0	0	0
GSE8835_CD4_VS_CD8_TCELL_CLL_PATIENT_UP	0	0	0	0	0	0	0	0	0	0	0	0	0	0	0
GSE6674_ANTI_IGM_VS_CPG_STIM_BCELL_DN	0	0	0	0	0	0	0	0	0	0	0	0	0	0	0
GSE29164_UNTREATED_VS_CD8_TCELL_AND_IL12_TREATED_MELANOMA_DAY7_DN	0	0	0	0	0	0	0	0	0	0	0	0	0	0	0
GSE35685_CD34POS_CD38NEG_VS_CD34POS_CD10POS_BONE_MARROW_UP	0	0	0	0	0	0	0	0	0	0	0	0.95298	0	0	0
GSE13738_RESTING_VS_BYSTANDER_ACTIVATED_CD4_TCELL_DN	0	0	0	0	0	0	0	0	0	0	0	0	0	0	0
GSE24634_TEFF_VS_TCONV_DAY10_IN_CULTURE_DN	0	0	0	0	0	0	0	0	0	0	0	1.69757	0	0	0
GSE2770_IL4_ACT_VS_ACT_CD4_TCELL_2H_DN	0	0	0	0	0	0	0	0	0	0	0	0	0	0	0
GSE23502_BM_VS_COLON_TUMOR_HDC_KO_MYELOID_DERIVED_SUPPRESSOR_CELL_DN	0	0	0	0	0	0	0	0	0	0	0	0	0	0	0
GSE36009_WT_VS_NLRP10_KO_DC_LPS_STIM_UP	0	0	0	0	0	0	0	0	0	0	0	0	0	0	0
GSE42021_TCONV_PLN_VS_CD24LO_TCONV_THYMUS_DN	0	0	0	0	0	0	0	0	0	0	0	0	0	0	0
GOLDRATH_EFF_VS_MEMORY_CD8_TCELL_DN	0	0	0	0	0	0	0	0	0	0	0	0	0	0	0
GSE9878_CTRL_VS_EBF_TRANSDUCED_PAX5_KO_PRO_BCELL_UP	0	0	0	0	0	0	0	0	0	0	0	0.176281	0	0	0
GSE17186_CD21LOW_VS_CD21HIGH_TRANSITIONAL_BCELL_DN	0	0	0	0	0	0	0	0	0	0	0	0	0	0	0
GSE23925_DARK_ZONE_VS_NAIVE_BCELL_DN	0	0	0	0	0	0	0	0	0	0	0	1.67007	0	0	0
GSE36009_WT_VS_NLRP10_KO_DC_DN	0	0	0	0	0	0	0	0	0	0	0	0	0	0	0
GSE32034_UNTREATED_VS_ROSIGLIZATONE_TREATED_LY6C_HIGH_MONOCYTE_UP	0	0	0	0	0	0	0	0	0	0	0	0	0	0	0
GSE43955_TH0_VS_TGFB_IL6_TH17_ACT_CD4_TCELL_1H_UP	0	0	0	0	0	0	0	0	0	0	0	0	0	0	0
GSE17721_LPS_VS_PAM3CSK4_16H_BMDC_UP	0	0	0	0	0	0	0	0	0	0	0	0	0	0	0
GSE22886_CD4_TCELL_VS_BCELL_NAIVE_UP	0	0	0	0	0	0	0	0	0	0	0	0	0	0	0
GSE5589_LPS_VS_LPS_AND_IL6_STIM_IL6_KO_MACROPHAGE_45MIN_DN	0	0	0	0	0	0	0	0	0	0	0	0	0	0	0
GSE7831_UNSTIM_VS_CPG_STIM_PDC_1H_UP	0	0	0	0	0	0	0	0	0	0	0	0	0	0	0
GSE26488_CTRL_VS_PEPTIDE_INJECTION_HDAC7_DELTAP_TG_OT2_THYMOCYTE_DN	0	0	0	0	0	0	0	0	0	0	0	0	0	0	0
KAECH_NAIVE_VS_DAY15_EFF_CD8_TCELL_DN	0	0	0	0	0	0	0	0	0	0	0	0	0	0	0
GSE11057_NAIVE_VS_MEMORY_CD4_TCELL_DN	0	0	0	0	0	0	0	0	0	0	0	0	0	0	0
HALLMARK_COMPLEMENT	0	0	0	0	0	0	0	0	0	0	0	0	0	0	0
GSE5589_UNSTIM_VS_45MIN_LPS_AND_IL6_STIM_MACROPHAGE_UP	0	0	0	0	0	0	0	0	0	0	0	0	0	0	0
GSE7831_UNSTIM_VS_CPG_STIM_PDC_4H_DN	0	0	0	0	0	0	0	0	0	0	0	0	0	0	0
GSE22025_TGFB1_VS_TGFB1_AND_PROGESTERONE_TREATED_CD4_TCELL_UP	0	0	0	0	0	0	0	0	0	0	0	0	0	0	0
GSE36078_UNTREATED_VS_AD5_INF_MOUSE_LUNG_DC_DN	0	0	0	0	0	0	0	0	0	0	0	0	0	0	0
GSE17721_ALL_VS_24H_PAM3CSK4_BMDC_UP	0	0	0	0	0	0	0	0	0	0	0	0	0	0	0
GSE22886_NAIVE_TCELL_VS_DC_DN	0	0	0	0	0	0	0	0	0	0	0	0.110902	0	0	0
GSE339_CD4POS_VS_CD8POS_DC_UP	0	0	0	0	0	0	0	0	0	0	0	0	0	0	0
GSE22140_HEALTHY_VS_ARTHRITIC_MOUSE_CD4_TCELL_DN	0	0	0	0	0	0	0	0	0	0	0	0	0	0	0
GSE24726_WT_VS_E2-2_KO_PDC_DAY4_POST_DELETION_DN	0	0	0	0	0	0	0	0	0	0	0	0	0	0	0
GSE22025_TGFB1_VS_TGFB1_AND_PROGESTERONE_TREATED_CD4_TCELL_DN	0	0	0	0	0	0	0	0	0	0	0	0	0	0	0
PLASARI_TGFB1_TARGETS_10HR_UP	0	0	0	0	0	0	0	0	0	0	0	0	0	0	0
GSE3039_ALPHAALPHA_CD8_TCELL_VS_B1_BCELL_DN	0	0	0	0	0	0	0	0	0	0	0	0	0	0	0
GSE17186_NAIVE_VS_CD21HIGH_TRANSITIONAL_BCELL_DN	0	0	0	0	0	0	0	0	0	0	0	0	0	0	0
GSE26343_WT_VS_NFAT5_KO_MACROPHAGE_LPS_STIM_UP	0	0	0	0	0	0	0	0	0	0	0	0	0	0	0
GSE35685_CD34POS_CD38NEG_VS_CD34POS_CD10NEG_CD62LPOS_BONE_MARROW_DN	0	0	0	0	0	0	0	0	0	0	0	0	0	0	0
GSE44649_NAIVE_VS_ACTIVATED_CD8_TCELL_UP	0	0	0	0	0	0	0	0	0	0	0	0	0	0	0
GOLDRATH_NAIVE_VS_EFF_CD8_TCELL_UP	0	0	0	0	0	0	0	0	0	0	0	0	0	0	0
GSE17721_PAM3CSK4_VS_GADIQUIMOD_1H_BMDC_UP	0	0	0	0	0	0	0	0	0	0	0	0	0	0	0
GSE17721_12H_VS_24H_PAM3CSK4_BMDC_UP	0	0	0	0	0	0	0	0	0	0	0	0	0	0	0
GSE17721_0.5H_VS_8H_CPG_BMDC_UP	0	0	0	0	0	0	0	0	0	0	0	0.0677497	0	0	0
GSE9037_WT_VS_IRAK4_KO_LPS_1H_STIM_BMDM_UP	0	0	0	0	0	0	0	0	0	0	0	0	0	0	0
GSE2405_0H_VS_3H_A_PHAGOCYTOPHILUM_STIM_NEUTROPHIL_UP	0	0	0	0	0	0	0	0	0	0	0	0	0	0	0
GSE2585_CTEC_VS_THYMIC_DC_DN	0	0	0	0	0	0	0	0	0	0	0	0	0	0	0
GSE19941_IL10_KO_VS_IL10_KO_AND_NFKBP50_KO_UNSTIM_MACROPHAGE_DN	0	0	0	0	0	0	0	0	0	0	0	0	0	0	0
GSE29949_MICROGLIA_VS_DC_BRAIN_UP	0	0	0	0	0	0	0	0	0	0	0	0	0	0	0
GSE42724_MEMORY_BCELL_VS_PLASMABLAST_UP	0	0	0	0	0	0	0	0	0	0	0	0	0	0	0
GSE2197_IMMUNOSUPPRESSIVE_DNA_VS_UNTREATED_IN_DC_UP	0	0	0	0	0	0	0	0	0	0	0	0	0	0	0
GSE8384_CTRL_VS_B_ABORTUS_4H_MAC_CELL_LINE_DN	0	0	0	0	0	0	0	0	0	0	0	0	0	0	0
GSE9650_EFFECTOR_VS_MEMORY_CD8_TCELL_DN	0	0	0	0	0	0	0	0	0	0	0	0	0	0	0
GSE41176_WT_VS_TAK1_KO_ANTI_IGM_STIM_BCELL_3H_DN	0	0	0	0	0	0	0	0	0	0	0	0	0	0	0
GSE45365_NK_CELL_VS_CD8A_DC_UP	0	0	0	0	0	0	0	0	0	0	0	0	0	0	0
PICCALUGA_ANGIOIMMUNOBLASTIC_LYMPHOMA_UP	0	0	0	0	0	0	0	0	0	0	0	0	0	0	0
GO_CONNECTIVE_TISSUE_DEVELOPMENT	0	0	0	0	0	0	0	0	0	0	0	0	0	0	0
GSE17721_POLYIC_VS_PAM3CSK4_1H_BMDC_DN	0	0	0	0	0	0	0	0	0	0	0	0	0	0	0
GSE16266_CTRL_VS_HEATSHOCK_AND_LPS_STIM_MEF_DN	0	0	0	0	0	0	0	0	0	0	0	0	0	0	0
REACTOME_PLATELET_ACTIVATION_SIGNALING_AND_AGGREGATION	0	0	0	0	0	0	0	0	0	0	0	0	0	0	0
KIM_WT1_TARGETS_UP	0	0	0	0	0	0	0	0	0	0	0	0	0	0	0
GO_ADAPTIVE_IMMUNE_RESPONSE	0	0	0	0	0	0	0	0	0	0	0	0	0	0	0
GO_REGULATION_OF_PEPTIDYL_TYROSINE_PHOSPHORYLATION	0	0	0	0	0	0	0	0	0	0	0	0	0	0	0
GO_RESPONSE_TO_TUMOR_NECROSIS_FACTOR	0	0	0	0	0	0	0	0	0	0	0	0	0	0	0
BILD_E2F3_ONCOGENIC_SIGNATURE	0	0	0	0	0	0	0	0	0	0	0	0	0	0	0
RUTELLA_RESPONSE_TO_HGF_DN	0	0	0	0	0	0	0	0	0	0	0	0	0	0	0
GO_RESPONSE_TO_VIRUS	0	0	0	0	0	0	0	0	0	0	0	0	0	0	0.0455404
NABA_ECM_REGULATORS	0	0	0	0	0	0	0	0	0	0	0	0	0	0	0
CONCANNON_APOPTOSIS_BY_EPOXOMICIN_UP	0	0	0	0	0	0	0	0	0	0	0	1.58157	0	0	0
V$COUP_DR1_Q6	0	0	0	0	0	0	0	0	0	0	0	0	0	0	0
BOYLAN_MULTIPLE_MYELOMA_C_D_DN	0	0	0	0	0	0	0	0	0	0	0	0	0	0	0
V$IRF7_01	0	0	0	0	0	0	0	0	0	0	0	0	0	0	0
V$ICSBP_Q6	0	0	0	0	0	0	0	0	0	0	0	0	0	0	0
V$COUP_01	0	0	0	0	0	0	0	0	0	0	0	0	0	0	0
GO_NEGATIVE_REGULATION_OF_LOCOMOTION	0	0	0	0	0	0	0	0	0	0	0	0	0	0	0
KAAB_HEART_ATRIUM_VS_VENTRICLE_UP	0	0	0	0	0	0	0	0	0	0	0	0	0	0	0
V$AP1_01	0	0	0	0	0	0	0	0	0	0	0	0	0	0	0
GO_CARBOXYLIC_ACID_BIOSYNTHETIC_PROCESS	0	0	0	0	0	0	0	0	0	0	0	0	0.0433397	0	0
GO_ORGANIC_ACID_BIOSYNTHETIC_PROCESS	0	0	0	0	0	0	0	0	0	0	0	0	0.0433397	0	0
V$CP2_01	0	0	0	0	0	0	0	0	0	0	0	0	0	0	0
V$AP1_Q4	0	0	0	0	0	0	0	0	0	0	0	0	0	0	0
GO_CELLULAR_RESPONSE_TO_EXTERNAL_STIMULUS	0	0	0	0	0	0	0	0	0	0	0	3.01426	0	0	0
KEGG_MAPK_SIGNALING_PATHWAY	0	0	0	0	0	0	0	0	0	0	0	0	0	0	0
GO_POSITIVE_REGULATION_OF_CYTOPLASMIC_TRANSPORT	0	0	0	0	0	0	0	0	0	0	0	0	0	0	0
GO_ORGANELLE_SUBCOMPARTMENT	0	0	0	0	0	0	0	0	0	0	0	0	0	0	0
GO_REGULATION_OF_PROTEIN_TARGETING	0	0	0	0	0	0	0	0	0	0	0	0	0	0	0
GO_UROGENITAL_SYSTEM_DEVELOPMENT	0	0	0	0	0	0	0	0.554064	0	0	0	0	0	0	0
WANG_LMO4_TARGETS_UP	0	0	0	0	0	0	0	0	0	0	0	0	0	0	0
GO_EYE_DEVELOPMENT	0	0	0	0	0	0	0	0	0	0	0	0.267458	0	0	0
GO_ENZYME_INHIBITOR_ACTIVITY	0	0	0	0	0	0	0	0	0	0	0	0	0	0	0
GO_POSITIVE_REGULATION_OF_CELL_ADHESION	0	0	0	0	0	0	0	0	0	0	0	0.158508	0	0	0
GO_CELL_LEADING_EDGE	0	0	0	0	0	0	0	0	0	0	0	0	0	0	0
MODULE_94	0	0	0	0	0	0	0	0	0	0	0	0	0	0	0
MODULE_532	0	0	0	0	0	0	0	0	0	0	0	0	0	0	0
COLINA_TARGETS_OF_4EBP1_AND_4EBP2	0	0	0	0	0	0	0	0.388569	0	0	0	0	0	0	0
WANG_TUMOR_INVASIVENESS_UP	0	0	0	0	0	0	0	0	0	0	0	0	0	0	0
GO_REGULATION_OF_PROTEIN_SECRETION	0	0	0	0	0	0	0	0	0	0	0	0.32452	0	0	0
RATTENBACHER_BOUND_BY_CELF1	0	0	0	0	0	0	0	0	0	0	0	0	0	0	0
GO_ACTIN_BINDING	0	0	0	0	0	0	0	0	0	0	0	0	0	0	0
GO_LIGASE_ACTIVITY	0	0	0	0	0	0	0	0	0	0	0	0	0	0	0
GCCATNTTG_V$YY1_Q6	0	0	0	0	0	0	0	0	0	0	0	0	0	0	0
GO_ATPASE_ACTIVITY	0	0	0	0	0	0	0	0	0	0	0	0	0	0	0
SENESE_HDAC1_TARGETS_UP	0	0	0	0	0	0	0	0	0	0	0	0	0	0	0
MODULE_8	0	0	1.10103	0	0	0	0	0	0	0	0	0	0	0	0
GO_PATTERN_SPECIFICATION_PROCESS	0	0	0	0	0	0	0	0	0	0	0	0	0	0	0
GO_ORGANOPHOSPHATE_BIOSYNTHETIC_PROCESS	0	0	0	0	0	0	0	1.01134	0	0	0	0	0	0	0
GO_ACTIN_FILAMENT_BASED_PROCESS	0	0	0	0	0	0	0	0	0	0	0	0	0	0	0
GO_ORGANIC_HYDROXY_COMPOUND_METABOLIC_PROCESS	0	0	0	0	0	0	0	0	0	0	0	0.289713	0	0	0
RODRIGUES_THYROID_CARCINOMA_ANAPLASTIC_DN	0	0	0	0	0	0	0	2.43711	0	0	0	0	2.51728	0	0
PILON_KLF1_TARGETS_UP	0	0	0	0	0	0	0	0	0	0	0	0	0	0	0
TGCGCANK_UNKNOWN	0	0	0	0	0	0	0	0	0	0	0	0	0	0	0
MODULE_41	0	0	0	0	0	0	0	0	0	0	0	0	0	0	0
LABADORF_HUNTINGTONS_DN	0	0	0	0	0	0	0	0	0	0	0	0	0	0	0
MODULE_11	0	0	0	0	0	0	0	2.74462	0	0	0	0	4.12545	0	0
MODULE_100	0	0	0	0	0	0	0	0.952919	0	0	0	0	3.43543	0	0
BENPORATH_PRC2_TARGETS	0	0	0	0	0	0	0	0	0	0	0	0	0	0	0
GO_CHROMATIN_ORGANIZATION	0	0	0	0	0	0	0	0	0	0	0	0	0	0	0
GO_CELLULAR_MACROMOLECULAR_COMPLEX_ASSEMBLY	0	0	0	0	0	0	0	0	0	0	0	0	0	0	0
DIRMEIER_LMP1_RESPONSE_EARLY	0	0	0	0	0	0	5.71758	0	0	0	0	2.45697	0	0	0
BASSO_CD40_SIGNALING_UP	0	0	0	0	0	0	3.30422	0	0	0	0	1.12718	0	0	0
GGGNNTTTCC_V$NFKB_Q6_01	0	0	0	0	0	0	1.34908	0	0	0	0	0	0	0	0
GO_REGULATION_OF_LEUKOCYTE_MIGRATION	0	0	0	0	0	0	1.03574	0	0	0	0	0	0	0	0
LANDIS_ERBB2_BREAST_TUMORS_324_DN	0	0	0	0	0	0	0.867225	1.64701	0	0	0	0	0	0	0
GSE36891_UNSTIM_VS_POLYIC_TLR3_STIM_PERITONEAL_MACROPHAGE_UP	0	0	0	0	0	0	0.785204	0	0	0	0	0	0	0	0
GSE6269_HEALTHY_VS_FLU_INF_PBMC_DN	0	0	0	0	0	0	0.705065	0	0	0	0	0	0	0	0
GO_NEGATIVE_REGULATION_OF_CELL_ACTIVATION	0	0	0	0	0	0	0.705065	0	0	0	0	0.383771	0	0	0
GSE21033_CTRL_VS_POLYIC_STIM_DC_24H_UP	0	0	0	0	0	0	0.626682	0	0	0	0	0	0	0	0
NING_CHRONIC_OBSTRUCTIVE_PULMONARY_DISEASE_UP	0	0	0	0	0	0	0.550159	0	0	0	0	0	0	0	0
GSE17974_CTRL_VS_ACT_IL4_AND_ANTI_IL12_12H_CD4_TCELL_UP	0	0	0	0	0	0	0.364633	0	0	0	0	0.922666	0	0	0
GSE7348_UNSTIM_VS_TOLERIZED_AND_LPS_STIM_MACROPHAGE_UP	0	0	0	0	0	0	0.364633	0	0	0	0	0	0	0	0
GSE17974_0H_VS_1H_IN_VITRO_ACT_CD4_TCELL_DN	0	0	0	0	0	0	0.292721	0	0	0	0	0	0	0	0
GSE3982_BCELL_VS_TH1_UP	0	0	0	0	0	0	0.25738	0	0	0	0	4.287	0	0	0
GSE40274_CTRL_VS_IRF4_TRANSDUCED_ACTIVATED_CD4_TCELL_DN	0	0	0	0	0	0	0.222251	0	0	0	0	0	0	0	0
GSE11864_CSF1_VS_CSF1_IFNG_PAM3CYS_IN_MAC_UP	0	0	0	0	0	0	0.153338	0	0	0	0	0	0	0	0
GSE26488_WT_VS_VP16_TRANSGENIC_HDAC7_KO_DOUBLE_POSITIVE_THYMOCYTE_DN	0	0	0	0	0	0	0.153338	0	0	0	0	0	0	0	0
GSE14000_UNSTIM_VS_4H_LPS_DC_DN	0	0	0	0	0	0	0.119293	0	0	0	0	0	0	0	0
GSE3982_CENT_MEMORY_CD4_TCELL_VS_TH2_UP	0	0	0	0	0	0	0.0192055	0	0	0	0	0	0	0	0
GSE9988_ANTI_TREM1_AND_LPS_VS_CTRL_TREATED_MONOCYTES_UP	0	0	0	0	0	0	0.0192055	0	0	0	0	0	0	0	0
GSE20484_MCSG_VS_CXCL4_MONOCYTE_DERIVED_MACROPHAGE_UP	0	0	0	0	0	0	0.0192055	0	0	0	0	0	0	0	0
GSE2770_TGFB_AND_IL4_VS_IL12_TREATED_ACT_CD4_TCELL_2H_DN	0	0	0	0	0	0	0	0	0	0	0	0	0	0	0
GSE2770_TGFB_AND_IL4_VS_IL4_TREATED_ACT_CD4_TCELL_48H_DN	0	0	0	0	0	0	0	0	0	0	0	0	0	0	0
GSE6259_DEC205_POS_DC_VS_BCELL_DN	0	0	0	0	0	0	0	0	0	0	0	0	0	0	0
GSE35825_UNTREATED_VS_IFNA_STIM_MACROPHAGE_UP	0	0	0	0	0	0	0	0	0	0	0	0	0	0	0
GSE32901_NAIVE_VS_TH17_NEG_CD4_TCELL_UP	0	0	0	0	0	0	0	0	0	0	0	0	0	0	0
JISON_SICKLE_CELL_DISEASE_UP	0	0	0	0	0	0	0	0	0	0	0	0	0	0	0
GSE2706_UNSTIM_VS_8H_LPS_AND_R848_DC_DN	0	0	0	0	0	0	0	0	0	0	0	0	0	0	0
GSE7509_UNSTIM_VS_IFNA_STIM_IMMATURE_DC_DN	0	0	0	0	0	0	0	0	0	0	0	0	0	0	0
REACTOME_POST_TRANSLATIONAL_PROTEIN_MODIFICATION	0	0	0	0	0	0	0	0	0	0	0	0	0	0	0
GSE29618_PRE_VS_DAY7_FLU_VACCINE_MONOCYTE_DN	0	0	0	0	0	0	0	0	0	0	0	0	0	0	0
GO_REGULATION_OF_CHEMOTAXIS	0	0	0	0	0	0	0	0	0	0	0	0	0	0	0
ESC_V6.5_UP_LATE.V1_DN	0	0	0	0	0	0	0	0	0	0	0	0	0	0	0
GSE13485_DAY7_VS_DAY21_YF17D_VACCINE_PBMC_UP	0	0	0	0	0	0	0	0	0	0	0	0	0	0	0
GSE36476_CTRL_VS_TSST_ACT_16H_MEMORY_CD4_TCELL_OLD_UP	0	0	0	0	0	0	0	0	0	0	0	0	0	0	0
GSE6092_IFNG_VS_IFNG_AND_B_BURGDORFERI_INF_ENDOTHELIAL_CELL_DN	0	0	0	0	0	0	0	0	0	0	0	0	0	0	0
GSE9988_ANTI_TREM1_VS_LOW_LPS_MONOCYTE_UP	0	0	0	0	0	0	0	0	0	0	0	0	0	0	0
GSE20727_CTRL_VS_ROS_INH_AND_DNFB_ALLERGEN_TREATED_DC_UP	0	0	0	0	0	0	0	0	0	0	0	0	0	0	0
GSE17721_CTRL_VS_POLYIC_6H_BMDC_UP	0	0	0	0	0	0	0	0	0	0	0	0	0	0	0
GSE7548_DAY7_VS_DAY28_PCC_IMMUNIZATION_CD4_TCELL_DN	0	0	0	0	0	0	0	0	0	0	0	0	0	0	0
GSE19825_NAIVE_VS_IL2RALOW_DAY3_EFF_CD8_TCELL_DN	0	0	0	0	0	0	0	0	0	0	0	0	0	0	0
GSE6092_B_BURGDOFERI_VS_B_BURGDORFERI_AND_IFNG_STIM_ENDOTHELIAL_CELL_DN	0	0	0	0	0	0	0	0	0	0	0	0	0	0	0
GSE36392_TYPE_2_MYELOID_VS_MAC_IL25_TREATED_LUNG_DN	0	0	0	0	0	0	0	0	0	0	0	0	0	0	0
GSE3982_MAST_CELL_VS_NEUTROPHIL_DN	0	0	0	0	0	0	0	0	0	0	0	0	0	0	0
GO_MYELOID_CELL_DIFFERENTIATION	0	0	0	0	0	0	0	0	0	0	0	0	0	0	0
DUMITRIU_PARKINSONS_UP	0	0	0	0	0	0	0	0	0	0	0	0	0	0	0
GSE12845_IGD_NEG_BLOOD_VS_DARKZONE_GC_TONSIL_BCELL_UP	0	0	0	0	0	0	0	0	0	0	0	0	0	0	0
GSE1432_6H_VS_24H_IFNG_MICROGLIA_DN	0	0	0	0	0	0	0	0	0	0	0	0	0	0	0
GSE29618_PDC_VS_MDC_DAY7_FLU_VACCINE_DN	0	0	0	0	0	0	0	0	0	0	0	0	0	0	0
GSE360_HIGH_DOSE_B_MALAYI_VS_M_TUBERCULOSIS_DC_DN	0	0	0	0	0	0	0	0	0	0	0	0	0	0	0
GSE36476_CTRL_VS_TSST_ACT_72H_MEMORY_CD4_TCELL_YOUNG_UP	0	0	0	0	0	0	0	0	0	0	0	0	0	0	0
GSE3982_BASOPHIL_VS_CENT_MEMORY_CD4_TCELL_UP	0	0	0	0	0	0	0	0	0	0	0	0	0	0	0
GSE8921_UNSTIM_VS_TLR1_2_STIM_MONOCYTE_24H_UP	0	0	0	0	0	0	0	0	0	0	0	0	0	0	0
GSE27241_CTRL_VS_DIGOXIN_TREATED_RORGT_KO_CD4_TCELL_IN_TH17_POLARIZING_CONDITIONS_DN	0	0	0	0	0	0	0	0	0	0	0	0	0	0	0
GSE34515_CD16_NEG_MONOCYTE_VS_DC_UP	0	0	0	0	0	0	0	0	0	0	0	0	0	0	0
GSE27434_WT_VS_DNMT1_KO_TREG_UP	0	0	0	0	0	0	0	0	0	0	0	0	0	0	0
GSE3982_CTRL_VS_LPS_48H_DC_DN	0	0	0	0	0	0	0	0	0	0	0	0	0	0	0
GSE12392_WT_VS_IFNAR_KO_CD8A_NEG_SPLEEN_DC_UP	0	0	0	0	0	0	0	0	0	0	0	1.10708	0	0	0
GSE19198_6H_VS_24H_IL21_TREATED_TCELL_DN	0	0	0	0	0	0	0	0	0	0	0	0	0	0	0
GSE22589_HEALTHY_VS_SIV_INFECTED_DC_UP	0	0	0	0	0	0	0	0	0	0	0	0	0	0	0
GSE30971_CTRL_VS_LPS_STIM_MACROPHAGE_WBP7_HET_4H_DN	0	0	0	0	0	0	0	0	0	0	0	0	0	0	0
GSE11057_NAIVE_CD4_VS_PBMC_CD4_TCELL_DN	0	0	0	0	0	0	0	0	0	0	0	0	0	0	0
GSE360_LOW_DOSE_B_MALAYI_VS_M_TUBERCULOSIS_DC_DN	0	0	0	0	0	0	0	0	0	0	0	0	0	0	0
GSE411_100MIN_VS_400MIN_IL6_STIM_SOCS3_KO_MACROPHAGE_DN	0	0	0	0	0	0	0	0	0	0	0	0	0	0	0
GSE2405_S_AUREUS_VS_A_PHAGOCYTOPHILUM_NEUTROPHIL_DN	0	0	0	0	0	0	0	0	0	0	0	0	0	0	0
GSE3039_CD4_TCELL_VS_ALPHABETA_CD8_TCELL_UP	0	0	0	0	0	0	0	0	0	0	0	0	0	0	0
GSE9239_CTRL_VS_TNF_INHIBITOR_TREATED_DC_UP	0	0	0	0	0	0	0	0	0	0	0	0	0	0	0
GSE17721_PAM3CSK4_VS_CPG_16H_BMDC_DN	0	0	0	0	0	0	0	0	0	0	0	0	0	0	0
GSE17721_POLYIC_VS_CPG_16H_BMDC_UP	0	0	0	0	0	0	0	0	0	0	0	0	0	0	0
GSE24634_TREG_VS_TCONV_POST_DAY7_IL4_CONVERSION_DN	0	0	0	0	0	0	0	0	0	0	0	1.05486	0	0	0
GSE360_T_GONDII_VS_B_MALAYI_LOW_DOSE_DC_DN	0	0	0	0	0	0	0	0	0	0	0	0	0	0	0
GSE3982_DC_VS_EFF_MEMORY_CD4_TCELL_UP	0	0	0	0	0	0	0	0	0	0	0	0	0	0	0
GSE9988_LOW_LPS_VS_CTRL_TREATED_MONOCYTE_DN	0	0	0	0	0	0	0	0	0	0	0	0	0	0	0
GSE557_WT_VS_I_AB_KO_DC_UP	0	0	0	0	0	0	0	0	0	0	0	0	0	0	0
GSE15330_WT_VS_IKAROS_KO_LYMPHOID_MULTIPOTENT_PROGENITOR_DN	0	0	0	0	0	0	0	0	0	0	0	0	0	0	0
GSE22313_HEALTHY_VS_SLE_MOUSE_CD4_TCELL_DN	0	0	0	0	0	0	0	0	0	0	0	0	0	0	0
GSE37563_WT_VS_CTLA4_KO_CD4_TCELL_D4_POST_IMMUNIZATION_DN	0	0	0	0	0	0	0	0	0	0	0	1.05486	0	0	0
CAMP_UP.V1_UP	0	0	0	0	0	0	0	0	0	0	0	0	0	0	0
GSE12845_IGD_NEG_BLOOD_VS_NAIVE_TONSIL_BCELL_UP	0	0	0	0	0	0	0	0	0	0	0	0.288504	0	0	0
GSE13229_IMM_VS_MATURE_NKCELL_DN	0	0	0	0	0	0	0	0	0	0	0	0	0	0	0
GSE17721_POLYIC_VS_CPG_4H_BMDC_DN	0	0	0	0	0	0	0	0	0	0	0	0	0	0	0
GSE17721_POLYIC_VS_GARDIQUIMOD_12H_BMDC_UP	0	0	0	0	0	0	0	0	0	0	0	1.80955	0	0	0
GSE29618_BCELL_VS_PDC_DAY7_FLU_VACCINE_DN	0	0	0	0	0	0	0	0	0	0	0	0.288504	0	0	0
GSE5463_CTRL_VS_DEXAMETHASONE_TREATED_THYMOCYTE_UP	0	0	0	0	0	0	0	0	0	0	0	0	0	0	0
GSE5589_LPS_VS_LPS_AND_IL10_STIM_IL6_KO_MACROPHAGE_45MIN_UP	0	0	0	0	0	0	0	0	0	0	0	0	0	0	0
GSE7831_UNSTIM_VS_INFLUENZA_STIM_PDC_4H_DN	0	0	0	0	0	0	0	0	0	0	0	0	0	0	0
GSE28737_WT_VS_BCL6_HET_FOLLICULAR_BCELL_DN	0	0	0	0	0	0	0	0	0	0	0	0	0	0	0
GSE45382_UNTREATED_VS_TGFB_TREATED_MACROPHAGES_UP	0	0	0	0	0	0	0	0	0	0	0	0.288504	0	0	0
GSE17721_0.5H_VS_24H_CPG_BMDC_UP	0	0	0	0	0	0	0	0	0	0	0	0	0	0	0
GSE24142_EARLY_THYMIC_PROGENITOR_VS_DN3_THYMOCYTE_FETAL_UP	0	0	0	0	0	0	0	0	0	0	0	0	0	0	0
GSE19888_ADENOSINE_A3R_INH_PRETREAT_AND_ACT_BY_A3R_VS_TCELL_MEMBRANES_ACT_MAST_CELL_UP	0	0	0	0	0	0	0	0	0	0	0	0.265729	0	0	0
GSE26727_WT_VS_KLF2_KO_LPS_STIM_MACROPHAGE_UP	0	0	0	0	0	0	0	0	0	0	0	0	0	0	0
GSE33424_CD161_INT_VS_NEG_CD8_TCELL_UP	0	0	0	0	0	0	0	0	0	0	0	0	0	0	0
GSE26030_UNSTIM_VS_RESTIM_TH1_DAY5_POST_POLARIZATION_DN	0	0	0	0	0	0	0	0	0	0	0	0	0	0	0
GSE39152_CD103_NEG_VS_POS_MEMORY_CD8_TCELL_DN	0	0	0	0	0	0	0	0	0	0	0	0	0	0	0
GSE33292_DN3_THYMOCYTE_VS_TCF1_KO_TCELL_LYMPHOMA_UP	0	0	0	0	0	0	0	0	0	0	0	0	0	0	0
MORF_RPA2	0	0	0	0	0	0	0	0	0	0	0	0	0	0	0
GSE10239_NAIVE_VS_KLRG1HIGH_EFF_CD8_TCELL_UP	0	0	0	0	0	0	0	0	0	0	0	0	0	0	0
GSE17721_0.5H_VS_8H_PAM3CSK4_BMDC_UP	0	0	0	0	0	0	0	0	0	0	0	0	0	0	0
GSE27786_LIN_NEG_VS_CD8_TCELL_DN	0	0	0	0	0	0	0	0	0	0	0	0	0	0	0
GSE339_EX_VIVO_VS_IN_CULTURE_CD4CD8DN_DC_UP	0	0	0	0	0	0	0	0	0	0	0	0	0	0	0
GSE3982_MAC_VS_TH2_UP	0	0	0	0	0	0	0	0	0	0	0	0	0	0	0
GSE7219_WT_VS_NIK_NFKB2_KO_DC_UP	0	0	0	0	0	0	0	0	0	0	0	5.19782	0	0	0
GSE42021_CD24LO_TREG_VS_CD24LO_TCONV_THYMUS_DN	0	0	0	0	0	0	0	0	0	0	0	0	0	0	0
GSE42021_TREG_PLN_VS_CD24HI_TREG_THYMUS_DN	0	0	0	0	0	0	0	0	0	0	0	0	0	0	0
GSE43955_TH0_VS_TGFB_IL6_TH17_ACT_CD4_TCELL_42H_UP	0	0	0	0	0	0	0	0	0	0	0	0	0	0	0
GSE45739_NRAS_KO_VS_WT_UNSTIM_CD4_TCELL_UP	0	0	0	0	0	0	0	0	0	0	0	0	0	0	0
GSE17721_CTRL_VS_CPG_8H_BMDC_UP	0	0	0	0	0	0	0	0	0	0	0	0	0	0	0
GSE17721_LPS_VS_POLYIC_16H_BMDC_DN	0	0	0	0	0	0	0	0	0	0	0	0	0	0	0
GSE360_L_DONOVANI_VS_B_MALAYI_LOW_DOSE_MAC_DN	0	0	0	0	0	0	0	0	0	0	0	0	0	0	0
GSE360_L_DONOVANI_VS_M_TUBERCULOSIS_MAC_UP	0	0	0	0	0	0	0	0	0	0	0	0	0	0	0
GSE19401_UNSTIM_VS_RETINOIC_ACID_AND_PAM2CSK4_STIM_FOLLICULAR_DC_DN	0	0	0	0	0	0	0	0	0	0	0	0	0	0	0
GSE24574_BCL6_HIGH_VS_LOW_TFH_CD4_TCELL_UP	0	0	0	0	0	0	0	0	0	0	0	0	0	0	0
GSE23568_ID3_KO_VS_WT_CD8_TCELL_DN	0	0	0	0	0	0	0	0	0	0	0	0	0	0	0
GSE40274_FOXP3_VS_FOXP3_AND_IRF4_TRANSDUCED_ACTIVATED_CD4_TCELL_UP	0	0	0	0	0	0	0	0	0	0	0	0	0	0	0
GSE11057_NAIVE_VS_CENT_MEMORY_CD4_TCELL_DN	0	0	0	0	0	0	0	0	0	0	0	0	0	0	0
GSE13306_RA_VS_UNTREATED_TCONV_UP	0	0	0	0	0	0	0	0	0	0	0	0	0	0	0
GSE15930_STIM_VS_STIM_AND_IFNAB_48H_CD8_T_CELL_DN	0	0	0	0	0	0	0	0	0	0	0	0	0	0	0
GSE17580_UNINFECTED_VS_S_MANSONI_INF_TREG_UP	0	0	0	0	0	0	0	0	0	0	0	0	0	0	0
GSE17721_POLYIC_VS_PAM3CSK4_2H_BMDC_DN	0	0	0	0	0	0	0	0	0	0	0	0	0	0	0
GSE22886_NAIVE_CD4_TCELL_VS_DC_DN	0	0	0	0	0	0	0	0	0	0	0.874428	0	0	0	0
GSE26669_CTRL_VS_COSTIM_BLOCK_MLR_CD4_TCELL_UP	0	0	0	0	0	0	0	0	0	0	0	0	0	0	0
GSE360_T_GONDII_VS_B_MALAYI_LOW_DOSE_MAC_DN	0	0	0	0	0	0	0	0	0	0	0	0	0	0	0
GSE2770_IL12_ACT_VS_ACT_CD4_TCELL_48H_UP	0	0	0	0	0	0	0	0	0	0	0	0.198423	0	0	0
GSE21670_UNTREATED_VS_IL6_TREATED_STAT3_KO_CD4_TCELL_UP	0	0	0	0	0	0	0	0	0	0	0	0	0	0	0
GSE22103_UNSTIM_VS_LPS_STIM_NEUTROPHIL_UP	0	0	0	0	0	0	0	0	0	0	0	0	0	0	0
GSE28726_NAIVE_CD4_TCELL_VS_NAIVE_NKTCELL_UP	0	0	0	0	0	0	0	0	0	0	0	0	0	0	0
GSE40274_CTRL_VS_FOXP3_AND_HELIOS_TRANSDUCED_ACTIVATED_CD4_TCELL_DN	0	0	0	0	0	0	0	0	0	0	0	0	0	0	0
GSE45365_HEALTHY_VS_MCMV_INFECTION_CD8A_DC_IFNAR_KO_DN	0	0	0	0	0	0	0	0	0	0	0	0	0	0	0
GSE17721_PAM3CSK4_VS_CPG_2H_BMDC_DN	0	0	0	0	0	0	0	0	0	0	0	0	0	0	0
GSE17721_POLYIC_VS_GARDIQUIMOD_8H_BMDC_UP	0	0	0	0	0	0	0	0	0	0	0	0	0	0	0
GSE17721_0.5H_VS_8H_LPS_BMDC_UP	0	0	0	0	0	0	0	0	0	0	0	0	0	0	0
GSE360_L_DONOVANI_VS_B_MALAYI_LOW_DOSE_DC_UP	0	0	0	0	0	0	0	0	0	0	0	0	0	0	0
GSE360_L_DONOVANI_VS_B_MALAYI_LOW_DOSE_DC_DN	0	0	0	0	0	0	0	0	0	0	0	1.67007	0	0	0
GSE42021_CD24INT_TREG_VS_CD24INT_TCONV_THYMUS_UP	0	0	0	0	0	0	0	0	0	0	0	0	0	0	0
GGGACCA,MIR-133A,MIR-133B	0	0	0	0	0	0	0	0	0	0	0	0	0	0	0
GSE10239_MEMORY_VS_DAY4.5_EFF_CD8_TCELL_UP	0	0	0	0	0	0	0	0	0	0	0	0	0	0	0
GSE24142_DN2_VS_DN3_THYMOCYTE_UP	0	0	0	0	0	0	0	0	0	0	0	0	0	0	0
GSE1925_CTRL_VS_IFNG_PRIMED_MACROPHAGE_DN	0	0	0	0	0	0	0	0	0	0	0	0	0	0	0
GSE12392_IFNAR_KO_VS_IFNB_KO_CD8_NEG_SPLEEN_DC_DN	0	0	0	0	0	0	0	0	0	0	0	0	0	0	0
GSE43863_LY6C_INT_CXCR5POS_VS_LY6C_LOW_CXCR5NEG_EFFECTOR_CD4_TCELL_DN	0	0	0	0	0	0	0	0	0	0	0	0.878566	0	0	0
GSE11924_TFH_VS_TH2_CD4_TCELL_UP	0	0	0	0	0	0	0	0	0	0	0	0	0	0	0
GSE17721_PAM3CSK4_VS_CPG_6H_BMDC_UP	0	0	0	0	0	0	0	0	0	0	0	0	0	0	0
GSE17721_12H_VS_24H_GARDIQUIMOD_BMDC_UP	0	0	0	0	0	0	0	0	0	0	0	0	0	0	0
GSE7831_1H_VS_4H_INFLUENZA_STIM_PDC_UP	0	0	0.899994	0	0	0	0	0	0	0	0	0.132372	0	0	0
GSE43863_TH1_VS_LY6C_LOW_CXCR5NEG_EFFECTOR_CD4_TCELL_DN	0	0	0	0	0	0	0	0	0	0	0	0	0	0	0
GSE46606_IRF4MID_VS_WT_CD40L_IL2_IL5_DAY3_STIMULATED_BCELL_UP	0	0	0	0	0	0	0	0	0	0	0	0	0	0	0
GSE16522_ANTI_CD3CD28_STIM_VS_UNSTIM_MEMORY_CD8_TCELL_UP	0	0	0	0	0	0	0	0	0	0	0	0	0	0	0
GSE17721_LPS_VS_PAM3CSK4_1H_BMDC_DN	0	0	0	0	0	0	0	0	0	0	0	0	0	0	0
GSE7852_TREG_VS_TCONV_FAT_UP	0	0	0	0	0	0	0	0	0	0	0	0	0	0	0
GSE5589_IL6_KO_VS_IL10_KO_LPS_AND_IL10_STIM_MACROPHAGE_180MIN_DN	0	0	0	0	0	0	0	0	0	0	0	0	0	0	0
GSE7831_UNSTIM_VS_INFLUENZA_STIM_PDC_4H_UP	0	0	0	0	0	0	0	0	0	0	0	0	0	0	0
GSE23114_PERITONEAL_CAVITY_B1A_BCELL_VS_SPLEEN_BCELL_IN_SLE2C1_MOUSE_UP	0	0	0	0	0	0	0	0	0	0	0	0	0	0	0
GSE41867_NAIVE_VS_DAY15_LCMV_ARMSTRONG_EFFECTOR_CD8_TCELL_UP	0	0	0	0	0	0	0	0	0	0	0	0	0	0	0
GSE17721_LPS_VS_PAM3CSK4_12H_BMDC_DN	0	0	0	0	0	0	0	0	0	0	0	0	0	0	0
GSE339_CD8POS_VS_CD4CD8DN_DC_DN	0	0	0.0420069	0	0	0	0	0	0	0	0	0	0	0	0
GSE9037_WT_VS_IRAK4_KO_LPS_4H_STIM_BMDM_UP	0	0	0	0	0	0	0	0	0	0	0	0	0	0	0
GSE12198_CTRL_VS_HIGH_IL2_STIM_NK_CELL_DN	0	0	0	0	0	0	0	0	0	0	0	0	0	0	0
GSE17186_MEMORY_VS_CD21LOW_TRANSITIONAL_BCELL_UP	0	0	0	0	0	0	0	0	0	0	0	0	0	0	0
GSE37301_MULTIPOTENT_PROGENITOR_VS_GRAN_MONO_PROGENITOR_DN	0	0	0	0	0	0	0	0	0	0	0	0	0	0	0
GSE43955_10H_VS_60H_ACT_CD4_TCELL_WITH_TGFB_IL6_UP	0	0	0	0	0	0	0	0	0	0	0	0	0	0	0
KAECH_NAIVE_VS_DAY8_EFF_CD8_TCELL_DN	0	0	0	0	0	0	0	0	0	0	0	0	0	0	0
GSE17721_LPS_VS_POLYIC_8H_BMDC_DN	0	0	0	0	0	0	0	0	0	0	0	0	0	0	0
GSE17721_0.5H_VS_8H_POLYIC_BMDC_DN	0	0	0	0	0	0	0	0	0	0	0	0	0	0	0
GSE20715_WT_VS_TLR4_KO_24H_OZONE_LUNG_UP	0	0	0	0	0	0	0	0	0	0	0	0	0	0	0
GSE9650_NAIVE_VS_EFF_CD8_TCELL_DN	0	0	0	0	0	0	0	0	0	0	0	0	0	0	0
GSE21546_SAP1A_KO_VS_SAP1A_KO_AND_ELK1_KO_ANTI_CD3_STIM_DP_THYMOCYTES_DN	0	0	0	0	0	0	0	0	0	0	0	0.0677497	0	0	0
GSE33374_CD8_ALPHAALPHA_VS_ALPHABETA_CD161_HIGH_TCELL_DN	0	0	0	0	0	0	0	0	0	0	0	0	0	0	0.333127
GSE17721_CTRL_VS_POLYIC_12H_BMDC_DN	0	0	0	0	0	0	0	0	0	0	0	0	0	0	0
GSE28726_ACT_CD4_TCELL_VS_ACT_VA24NEG_NKTCELL_DN	0	0	0	0	0	0	0	0	0	0	0	0	0	0	0
GSE39152_SPLEEN_CD103_NEG_VS_BRAIN_CD103_POS_MEMORY_CD8_TCELL_UP	0	0	0	0	0	0	0	0	0	0	0	0.0465375	0	0	0
GSE27786_BCELL_VS_NEUTROPHIL_DN	0	0	0	0	0	0	0	0	0	0	0	0	0	0	0
GSE13522_CTRL_VS_T_CRUZI_Y_STRAIN_INF_SKIN_IFNAR_KO_DN	0	0	0	0	0	0	0	0	0	0	0	0	0	0	0
GSE19198_1H_VS_24H_IL21_TREATED_TCELL_UP	0	0	0	0	0	0	0	0	0	0	0	0	0	0	0
GSE28726_NAIVE_CD4_TCELL_VS_NAIVE_NKTCELL_DN	0	0	0	0	0	0	0	0	0	0	0	0	0	0	0
GSE28726_NAIVE_VS_ACTIVATED_CD4_TCELL_UP	0	0	0	0	0	0	0	0	0	0	0	0	0	0	0
GSE23321_CENTRAL_VS_EFFECTOR_MEMORY_CD8_TCELL_UP	0	0	0	0	0	0	0	0	0	0	0	0.0254743	0	0	0
GSE46143_CTRL_VS_LMP2A_TRANSDUCED_CD10_POS_GC_BCELL_UP	0	0	0	0	0	0	0	0	0	0	0	0.0254743	0	0	0
GSE17186_BLOOD_VS_CORD_BLOOD_CD21HIGH_TRANSITIONAL_BCELL_UP	0	0	0	0	0	0.936583	0	0	0	0	0	0	0	0	0
GSE28726_NAIVE_VS_ACTIVATED_VA24NEG_NKTCELL_UP	0	0	0	0	0	0	0	0	0	0	0	0	0	0	0
GSE34006_UNTREATED_VS_A2AR_AGONIST_TREATED_TREG_DN	0	0	0	0	0	0	0	0	0	0	0	0	0	0	0
GSE43955_1H_VS_20H_ACT_CD4_TCELL_WITH_TGFB_IL6_UP	0	0	0	0	0	0	0	0	0	0	0	0	0	0	0
GSE43955_TH0_VS_TGFB_IL6_IL23_TH17_ACT_CD4_TCELL_60H_UP	0	0	0	0	0	0	0	0	0	0	0	0	0	0	0
GSE17721_0.5H_VS_24H_PAM3CSK4_BMDC_UP	0	0	0	0	0	0	0	0	0	0	0	0	0	0	0
GSE17721_12H_VS_24H_LPS_BMDC_UP	0	0	0	0	0	0	0	0	0	0	0	0	0	0	0
CHANG_CORE_SERUM_RESPONSE_UP	0	0	0	0	0	0	0	0	0	0	0	0	0	0	0
GROSS_HYPOXIA_VIA_ELK3_UP	0	0	0	0	0	0	0	0	0	0	0	0	0	0	0
GAL_LEUKEMIC_STEM_CELL_DN	0	0	0	0	0	0	0	0	0	0	0	0	0	0	0
chr3p21	0	0	0	0	0	0	0	0	0	0	0	0	0	0	0
GO_REGULATION_OF_ERK1_AND_ERK2_CASCADE	0	0	0	0	0	0	0	0	0	0	0	0.291974	0	0	0
RUTELLA_RESPONSE_TO_HGF_VS_CSF2RB_AND_IL4_DN	0	0	0	0	0	0	0	0	0	0	0	0	0	0	0
HOLLMANN_APOPTOSIS_VIA_CD40_DN	0	0	0	0	0	0	0	0	0	0	0	0	0	0	0
MODULE_123	0	0	0	0	0	0	0	0	0	0	0	0	0	0	0
LU_EZH2_TARGETS_UP	0	0	0	0	0	0	0	0	0	0	0	0	0	0	0
V$CREBP1_Q2	0	0	0	0	0	0	0	0	0	0	0	0	0	0	0
V$NRF2_Q4	0	0	0	0	0	0	0	0	0	0	0	0	0	0	0
V$AREB6_03	0	0	0	0	0	0	0	0	0	0	0	0	0	0	0
WAMUNYOKOLI_OVARIAN_CANCER_LMP_UP	0	0	0	0	0	0	0	0	0	0	0	0	0	0	0
GO_MULTICELLULAR_ORGANISMAL_HOMEOSTASIS	0	0	0	0	0	0	0	0	0	0	0	0	0	0	0
GO_OSSIFICATION	0	0	0	0	0	0	0	0	0	0	0	0	0	0	0
ROZANOV_MMP14_TARGETS_UP	0	0	0	0	0	0	0	0	0	0	0	0	0	0	0
V$CEBPB_02	0	0	0	0	0	0	0	0	0	0	0	0	0	0	0
V$HNF4_01	0	0	0	0	0	0	0	0	0	0	0	0	0	0	0
BOQUEST_STEM_CELL_UP	0	0	0	0	0	0	0	0	0	0	0	0	0	0	0
V$STAT6_02	0	0	0	0	0	0	0	0	0	0	0	0	0	0	0
V$HNF4_DR1_Q3	0	0	0	0	0	0	0	0	0	0	0	0	0	0	0
KOYAMA_SEMA3B_TARGETS_UP	0	0	0	0	0	0	0	0	0	0	0	0	0	0	0
SHEDDEN_LUNG_CANCER_GOOD_SURVIVAL_A12	0	0	0	0	0	0	0	0	0	0	0	0	0	0	0
V$BACH1_01	0	0	0	0	0	0	0	0	0	0	0	0	0	0	0
V$AML1_01	0	0	0	0	0	0	0	0	0	0	0	0	0	0	0
V$AML1_Q6	0	0	0	0	0	0	0	0	0	0	0	0	0	0	0
V$AP1_Q4_01	0	0	0	0	0	0	0	0	0	0	0	0	0	0	0
RIZKI_TUMOR_INVASIVENESS_3D_DN	0	0	0	0	0	0	0	0	0	0	0	0	0	0	0
GO_FATTY_ACID_METABOLIC_PROCESS	0	0	0	0	0	0	0	2.07253	0	0	0	0	0.681835	0	0
V$AP1FJ_Q2	0	0	0	0	0	0	0	0	0	0	0	0	0	0	0
V$AP2_Q6_01	0	0	0	0	0	0	0	0	0	0	0	0	0	0	0
V$NFE2_01	0	0	0	0	0	0	0	0	0	0	0	0	0	0	0
GO_POSITIVE_REGULATION_OF_CELL_ACTIVATION	0	0	0	0	0	0	0	0	0	0	0	0.871324	0	0	0
V$EGR1_01	0	0	0	0	0	0	0	0	0	0	0	0	0	0	0
V$AP1_C	0	0	0	0	0	0	0	0	0	0	0	0	0	0	0
GO_IMMUNE_RESPONSE_REGULATING_CELL_SURFACE_RECEPTOR_SIGNALING_PATHWAY	0	0	0	0	0	0	0	0	0	0	0	0.105714	0	0	0
AGUIRRE_PANCREATIC_CANCER_COPY_NUMBER_UP	0	0	0	0	0	0	0	0	0	0	0	0	0	0	0
ACEVEDO_FGFR1_TARGETS_IN_PROSTATE_CANCER_MODEL_UP	0	0	0	0	0	0	0	0	0	0	0	0	0	0	0
TBK1.DF_UP	0	0	0	0	0	0	0	0	0	0	0	0	0	0	0
GO_VIRAL_LIFE_CYCLE	0	0	0	0	0	0	0	0	0	0	0	0	0	0	0
BROWNE_HCMV_INFECTION_14HR_DN	0	0	0	0	0	0	0	0	0	0	0	0	0	0	0
NABA_CORE_MATRISOME	0	0	0	0	0	0	0	0	0	0	0	0	0	0	0
HELLER_HDAC_TARGETS_UP	0	0	0	0	0	0	0	0	0	0	0	0	0	0	0
GINESTIER_BREAST_CANCER_ZNF217_AMPLIFIED_DN	0	0	0	0	0	0	0	0	0	0	0	0	0	0	0
GO_GLYCEROPHOSPHOLIPID_METABOLIC_PROCESS	0	0	0	0	0	0	0	0	0	0	0	0	0	0	0
GO_MEMBRANE_MICRODOMAIN	0	0	0	0	0	0	0	0	0	0	0	0.325781	0	0	0
WANG_RESPONSE_TO_GSK3_INHIBITOR_SB216763_UP	0	0	0	0	0	0	0	0	0	0	0	0	0	0	0
NIKOLSKY_BREAST_CANCER_17Q21_Q25_AMPLICON	0	0	0	0	0	0	0	0	0	0	0	0	0	0	0
MODULE_114	0	0	0	0	0	0	0	0	0	0	0	0	0	0	0
GO_REGULATION_OF_WNT_SIGNALING_PATHWAY	0	0	0	0	0	0	0	0	0	0	0	0	0	0	0
GO_NUCLEOSIDE_TRIPHOSPHATASE_REGULATOR_ACTIVITY	0	0	0	0	0	0	0	0	0	0	0	0	0	0	0
GO_TRANSCRIPTIONAL_ACTIVATOR_ACTIVITY_RNA_POLYMERASE_II_TRANSCRIPTION_REGULATORY_REGION_SEQUENCE_SPECIFIC_BINDING	0	0	0	0	0	0	0	0	0	0	0	0	0	0	0
GO_REGULATION_OF_MAP_KINASE_ACTIVITY	0	0	0	0	0	0	0	0	0	0	0	1.10711	0	0	0
GO_REGULATION_OF_CELLULAR_COMPONENT_SIZE	0	0	0	0	0	0	0	0	0	0	0	0	0	0	0
GO_NUCLEAR_TRANSPORT	0	0	0	0	0	0	0	0	0	0	0	0	0	0	0
MCCABE_BOUND_BY_HOXC6	0	0	0	0	0	0	0	0	0	0	0	0	0	0	0
ODONNELL_TFRC_TARGETS_UP	0	0	0	0	0	0	0	0	0	0	0	0.022894	0	0	0
GO_WNT_SIGNALING_PATHWAY	0	0	0	0	0	0	0	0	0	0	0	0	0	0	0
GO_PHOSPHORIC_ESTER_HYDROLASE_ACTIVITY	0	0	0	0	0	0	0	0	0	0	0	0	0	0	0
STEIN_ESRRA_TARGETS_UP	0	0	0	0	0	0	0	4.47798	0	0	0	0	0	0	0
RHEIN_ALL_GLUCOCORTICOID_THERAPY_DN	0	0	0	0	0	0	0	1.58955	0	0	0	0	1.00407	0	0
GO_SIDE_OF_MEMBRANE	0	0	0	0	0	0	0	0	0	0	0	0	0	0	0
OSMAN_BLADDER_CANCER_UP	0	0	0	0	0	0	0	0	0	0	0	0	0	0	0
GO_PURINE_CONTAINING_COMPOUND_METABOLIC_PROCESS	0	0	0	0	0	0	0	1.84159	0	0	0	0	0	0	0
GO_ENDOPEPTIDASE_ACTIVITY	0	0	0	0	0	0	0	0	0	0	0	0	0	0	0
ROME_INSULIN_TARGETS_IN_MUSCLE_UP	0	0	0.643573	0	0	0	0	0	0	0	0	0	0	0	0
GO_UBIQUITIN_LIKE_PROTEIN_TRANSFERASE_ACTIVITY	0	0	0	0	0	0	0	0	0	0	0	0	0	0	0
GARY_CD5_TARGETS_DN	0	0	0	0	0	0	0	0	0	0	0	0	0	0	0
GO_REGULATION_OF_MULTI_ORGANISM_PROCESS	0	0	0	0	0	0	0	0	0	0	0	0	0	0	0
GO_RIBONUCLEOPROTEIN_COMPLEX_BIOGENESIS	0	0	0	0	0	0	0	0	0	0	0	0	0	0	0
GO_PROTEIN_HETERODIMERIZATION_ACTIVITY	0	0	0	0	0	0	0	0	0	0	0	0	0	0	0
GO_CELL_DIVISION	0	0	0	0	0	0	0	0	0	0	0.046998	0	0	0	0
GO_REGULATION_OF_SYSTEM_PROCESS	0	0	0	0	0	0	0	0	0	0	0	0	0	0	0
GO_GAMETE_GENERATION	0	0	0	0	0	0	0	0	0	0	0	0	0	0	0
GO_CHROMATIN_MODIFICATION	0	0	0	0	0	0	0	0	0	0	0	0	0	0	0
FLECHNER_BIOPSY_KIDNEY_TRANSPLANT_REJECTED_VS_OK_DN	0	0	0.0312869	0	0	0	0	2.83971	0	0	0	0	3.5698	0	0
MODULE_137	0	0	0	0	0	0	0	0.423313	0	0	0	0	3.45205	0	0
GO_ION_HOMEOSTASIS	0	0	0	0	0	0	0	0	0	0	0	0	0	0	0
WTGAAAT_UNKNOWN	0	0	0	0	0	0	0	0	0	0	0	0	0	0	0
GO_SUPRAMOLECULAR_FIBER	0	0	0	0	0	0	0	0	0	0	0	0	0	0	0
GO_CELL_PART_MORPHOGENESIS	0	0	0	0	0	0	0	0	0	0	0	0	0	0	0
VERRECCHIA_EARLY_RESPONSE_TO_TGFB1	0	0	0	0	0	0	5.61343	0	0	0	0	0	0	0	0
WANG_ESOPHAGUS_CANCER_VS_NORMAL_UP	0	0	0	0	0	0	1.59961	0	0	0	0	0	0	0	0
MARKEY_RB1_CHRONIC_LOF_DN	0	0	0	0	0	0	1.54675	0	0	0	0	0	0	0	0
ZHU_CMV_ALL_DN	0	0	0	0	0	0	1.14547	0	0	0	0	0	0	0	0
LENAOUR_DENDRITIC_CELL_MATURATION_DN	0	0	0	0	0	0	1.0979	0	0	0	0	0	0	0	0
GO_NEGATIVE_REGULATION_OF_DEFENSE_RESPONSE	0	0	0	0	0	0	0.869176	0	0	0	0	0	0	0	0
GO_POSITIVE_REGULATION_OF_VASCULATURE_DEVELOPMENT	0	0	0	0	0	0	0.737746	0	0	0	0	0	0	0	0
GSE7509_FCGRIIB_VS_TNFA_IL1B_IL6_PGE_STIM_DC_DN	0	0	0	0	0	0	0.652771	0	0	0	0	0	0	0	0
GSE40666_STAT1_KO_VS_STAT4_KO_CD8_TCELL_WITH_IFNA_STIM_90MIN_DN	0	0	0	0	0	0	0.448879	0	0	0	0	0	0	0	0
BMI1_DN.V1_UP	0	0	0	0	0	0	0.409312	0	0	0	0	0	0	0	0
GSE37605_TREG_VS_TCONV_NOD_FOXP3_FUSION_GFP_UP	0	0	0	0	0	0	0.293102	0	0	0	0	0	0	0	0
GO_CELL_CHEMOTAXIS	0	0	0	0	0	0	0.143989	0	0	0	0	2.06208	0	0	0
CHIARADONNA_NEOPLASTIC_TRANSFORMATION_CDC25_DN	0	0	0	0	0	0	0.0717949	0	0	0	0	0	0	0	0
GO_REGULATION_OF_EXTRINSIC_APOPTOTIC_SIGNALING_PATHWAY	0	0	0	0	0	0	0.00127489	0	0	0	0	0.304354	0	0	0
MULLIGHAN_NPM1_SIGNATURE_3_DN	0	0	0	0	0	0	0	0	0	0	0	0	0	0	0
GSE26928_EFF_MEM_VS_CENTR_MEM_CD4_TCELL_UP	0	0	0	0	0	0	0	0	0	0	0	0	0	0	0
GSE3920_UNTREATED_VS_IFNG_TREATED_ENDOTHELIAL_CELL_UP	0	0	0	0	0	0	0	0	0	0	0	0.202119	0	0	0
GSE36891_UNSTIM_VS_PAM_TLR2_STIM_PERITONEAL_MACROPHAGE_DN	0	0	0	0	0	0	0	0	0	0	0	0	0	0	0
GSE6269_HEALTHY_VS_STAPH_PNEUMO_INF_PBMC_DN	0	0	0	0	0	0	0	0	0	0	0	0	0	0	0
GSE9988_ANTI_TREM1_AND_LPS_VS_VEHICLE_TREATED_MONOCYTES_UP	0	0	0	0	0	0	0	0	0	0	0	0	0	0	0
GSE35825_IFNA_VS_IFNG_STIM_MACROPHAGE_UP	0	0	0	0	0	0	0	0	0	0	0	0	0	0	0
SERVITJA_ISLET_HNF1A_TARGETS_UP	0	0	0	0	0	0	0	0	0	0	0	0	0	0	0
GSE9509_10MIN_VS_30MIN_LPS_STIM_IL10_KO_MACROPHAGE_DN	0	0	0	0	0	0	0	0	0	0	0	0	0	0	0
GSE12003_4D_VS_8D_CULTURE_BM_PROGENITOR_UP	0	0	0	0	0	0	0	0	0	0	0	0	0	0	0
GSE30971_2H_VS_4H_LPS_STIM_MACROPHAGE_WBP7_HET_UP	0	0	0	0	0	0	0	0	0	0	0	0	0	0	0
GSE9509_10MIN_VS_30MIN_LPS_AND_IL10_STIM_IL10_KO_MACROPHAGE_DN	0	0	0	0	0	0	0	0	0	0	0	0	0	0	0
GSE40274_CTRL_VS_IRF4_TRANSDUCED_ACTIVATED_CD4_TCELL_UP	0	0	0	0	0	0	0	0	0	0	0	0	0	0	0
GSE17974_CTRL_VS_ACT_IL4_AND_ANTI_IL12_2H_CD4_TCELL_UP	0	0	0	0	0	0	0	0	0	0	0	0.812489	0	0	0
GO_REGENERATION	0	0	0	0	0	0	0	0	0	0	0	0	0	0	0
GSE29618_PRE_VS_DAY7_FLU_VACCINE_MDC_DN	0	0	0	0	0	0	0	0	0	0	0	0	0	0	0
GSE24634_TEFF_VS_TCONV_DAY5_IN_CULTURE_DN	0	0	0	0	0	0	0	0	0	0	0	0	0	0	0
GSE26928_CENTR_MEMORY_VS_CXCR5_POS_CD4_TCELL_UP	0	0	0	0	0	0	0	0	0	0	0	0	0	0	0
GSE29618_BCELL_VS_PDC_DAY7_FLU_VACCINE_UP	0	0	0	0	0	0	0	0	0	0	0	0.00755644	0	0	0
GSE37416_CTRL_VS_12H_F_TULARENSIS_LVS_NEUTROPHIL_DN	0	0	0	0	0	0	0	0	0	0	0	0	0	0	0
GSE42021_CD24HI_VS_CD24LOW_TCONV_THYMUS_DN	0	0	0	0	0	0	0	0	0	0	0	0	0	0	0
GSE37416_CTRL_VS_6H_F_TULARENSIS_LVS_NEUTROPHIL_DN	0	0	0	0	0	0	0	0	0	0	0	0	0	0	0
GSE12366_GC_VS_NAIVE_BCELL_DN	0	0	0	0	0	0	0	0	0	0	0	2.29224	0	0	0
GSE22886_UNSTIM_VS_IL2_STIM_NKCELL_UP	0	0	0	0	0	0	0	0	0	0	0	0	0	0	0
GSE19198_6H_VS_24H_IL21_TREATED_TCELL_UP	0	0	0	0	0	0	0	0	0	0	0	0	0	0	0
GSE12366_GC_VS_MEMORY_BCELL_DN	0	0	0	0	0	0	0	0	0	0	0	0	0	0	0
GSE12845_IGD_POS_BLOOD_VS_PRE_GC_TONSIL_BCELL_UP	0	0	0	0	0	0	0	0	0	0	0	0	0	0	0
GSE36009_UNSTIM_VS_LPS_STIM_DC_UP	0	0	0	0	0	0	0	0	0	0	0	0	0	0	0
GSE1112_OT1_VS_HY_CD8AB_THYMOCYTE_RTOC_CULTURE_UP	0	0	0	0	0	0	0	0	0	0	0	0	0	0	0
GSE21360_NAIVE_VS_PRIMARY_MEMORY_CD8_TCELL_UP	0	0	1.3074	0	0	0	0	0	0	0	0	0	0	0	0
GSE30971_CTRL_VS_LPS_STIM_MACROPHAGE_WBP7_KO_2H_UP	0	0	0	0	0	0	0	0	0	0	0	0	0	0	0
GSE40274_IRF4_VS_FOXP3_AND_IRF4_TRANSDUCED_ACTIVATED_CD4_TCELL_UP	0	0	0	0	0	0	0	0	0	0	0	0	0	0	0
GSE3982_CENT_MEMORY_CD4_TCELL_VS_NKCELL_DN	0	0	0	0	0	0	0	0	0	0	0	0	0	0	0
GSE2770_IL12_AND_TGFB_VS_IL4_TREATED_ACT_CD4_TCELL_2H_UP	0	0	0	0	0	0	0	0	0	0	0	0	0	0	0
GSE4590_SMALL_VS_LARGE_PRE_BCELL_UP	0	0	0	0	0	0	0	0	0	0	0	0	0	0	0
GSE40685_TREG_VS_FOXP3_KO_TREG_PRECURSOR_UP	0	0	0	0	0	0	0	0	0	0	0	0.527273	0	0	0
LASTOWSKA_NEUROBLASTOMA_COPY_NUMBER_UP	0	0	0	0	0	0	0	0	0	0	0	0	0	0	0
GSE37416_0H_VS_24H_F_TULARENSIS_LVS_NEUTROPHIL_DN	0	0	0	0	0	0	0	0	0	0	0	0	0	0	0
GSE1740_UNSTIM_VS_IFNA_STIMULATED_MCSF_IFNG_DERIVED_MACROPHAGE_DN	0	0	0	0	0	0	0	0	0	0	0	0	0	0	0
GSE27859_MACROPHAGE_VS_CD11C_INT_F480_HI_MACROPHAGE_UP	0	0	0	0	0	0	0	0	0	0	0	0	0	0	0
TAKEDA_TARGETS_OF_NUP98_HOXA9_FUSION_8D_DN	0	0	0	0	0	0	0	0	0	0	0	0	0	0	0
GSE1432_CTRL_VS_IFNG_6H_MICROGLIA_DN	0	0	0	0	0	0	0	0	0	0	0	0	0	0	0
GSE15324_NAIVE_VS_ACTIVATED_CD8_TCELL_UP	0	0	0	0	0	0	0	0	0	0	0	0	0	0	0
GSE30083_SP1_VS_SP3_THYMOCYTE_DN	0	0	0	0	0	0	0	0	0	0	0	0	0	0	0
GSE26030_UNSTIM_VS_RESTIM_TH17_DAY5_POST_POLARIZATION_UP	0	0	0	0	0	0	0	0	0	0	0	0	0	0	0
GSE46242_CTRL_VS_EGR2_DELETED_ANERGIC_TH1_CD4_TCELL_UP	0	0	0	0	0	0	0	0	0	0	0	0	0	0	0
GSE19198_CTRL_VS_IL21_TREATED_TCELL_1H_DN	0	0	0	0	0	0	0	0	0	0	0	1.21377	0	0	0
GSE13484_12H_VS_3H_YF17D_VACCINE_STIM_PBMC_DN	0	0	0	0	0	0	0	0	0	0	0	0	0	0	0
GSE20198_UNTREATED_VS_IL12_IL18_TREATED_ACT_CD4_TCELL_DN	0	0	0	0	0	0	0	0	0	0	0	0	0	0	0
GO_MEMBRANE_LIPID_METABOLIC_PROCESS	0	0	0	0	0	0	0	0	0	0	0	0	0	0	0
BERTUCCI_MEDULLARY_VS_DUCTAL_BREAST_CANCER_UP	0	0	0	0	0	0	0	0	0	0	0	0	0	0	0
GSE10325_MYELOID_VS_LUPUS_MYELOID_DN	0	0	0	0	0	0	0	0	0	0	0	0	0	0	0
GSE17721_12H_VS_24H_GARDIQUIMOD_BMDC_DN	0	0	0	0	0	0	0	0	0	0	0	0	0	0	0
GSE17974_2H_VS_72H_UNTREATED_IN_VITRO_CD4_TCELL_DN	0	0	0	0	0	0	0	0	0	0	0	0	0	0	0
GSE360_T_GONDII_VS_B_MALAYI_HIGH_DOSE_DC_UP	0	0	0	0	0	0	0	0	0	0	0	1.15999	0	0	0
GSE36476_CTRL_VS_TSST_ACT_40H_MEMORY_CD4_TCELL_YOUNG_UP	0	0	0	0	0	0	0	0	0	0	0	0	0	0	0
GSE6259_DEC205_POS_DC_VS_CD8_TCELL_UP	0	0	0	0	0	0	0	0	0	0	0	0	0	0	0
GSE21360_NAIVE_VS_TERTIARY_MEMORY_CD8_TCELL_DN	0	0	0	0	0	0	0	0	0	0	0	0	0	0	0
chr9q34	0	0	0	0	0	0	0	0	0	0	0	0	0	0	0
GSE17721_LPS_VS_PAM3CSK4_24H_BMDC_DN	0	0	0	0	0	0	0	0	0	0	0	0	0	0	0
GSE22886_NAIVE_CD4_TCELL_VS_48H_ACT_TH2_UP	0	0	0	0	0	0	0	0	0	0	0	0	0	0	0
GSE24102_GRANULOCYSTIC_MDSC_VS_NEUTROPHIL_UP	0	0	0	0	0	0	0	0	0	0	0	0	0	0	0
GSE360_L_MAJOR_VS_B_MALAYI_HIGH_DOSE_DC_DN	0	0	0	0	0	0	0	0	0	0	0	0	0	0	0
GSE3982_MAC_VS_TH1_UP	0	0	0	0	0	0	0	0	0	0	0	0	0	0	0
GSE14908_RESTING_VS_HDM_STIM_CD4_TCELL_ATOPIC_PATIENT_DN	0	0	0	0	0	0	0	0	0	0	0	0	0	0	0
GSE30971_WBP7_HET_VS_KO_MACROPHAGE_2H_LPS_STIM_UP	0	0	0	0	0	0	0	0	0	0	0	0	0	0	0
GSE37301_PRO_BCELL_VS_RAG2_KO_NK_CELL_UP	0	0	0	0	0	0	0	0	0	0	0	0	0	0	0
GSE28737_FOLLICULAR_VS_MARGINAL_ZONE_BCELL_BCL6_HET_UP	0	0	0	0	0	0	0	0	0	0	0	0	0	0	0
KAECH_DAY8_EFF_VS_DAY15_EFF_CD8_TCELL_DN	0	0	0	0	0	0	0	0	0	0	0	0	0	0	0
GSE24634_IL4_VS_CTRL_TREATED_NAIVE_CD4_TCELL_DAY7_DN	0	0	0	0	0	0	0	0	0	0	0	0	0	0	0
GSE2706_UNSTIM_VS_8H_LPS_DC_UP	0	0	0	0	0	0	0	0	0	0	0	0	0	0	0
GSE2585_CTEC_VS_MTEC_THYMUS_DN	0	0	0	0	0	0	0	0	0	0	0	0	0	0	0
GSE7509_DC_VS_MONOCYTE_DN	0	0	0	0	0	0	0	0	0	0	0	0	0	0	0
GSE41867_DAY6_VS_DAY8_LCMV_CLONE13_EFFECTOR_CD8_TCELL_UP	0	0	0	0	0	0	0	0	0	0	0	0	0	0	0
GSE43863_DAY6_EFF_VS_DAY150_MEM_TFH_CD4_TCELL_UP	0	0	0	0	0	0	0	0	0	0	0	0	0	0	0
GSE14026_TH1_VS_TH17_UP	0	0	0	0	0	0	0	0	0	0	0	0	0	0	0
GSE17721_PAM3CSK4_VS_GADIQUIMOD_12H_BMDC_UP	0	0	0	0	0	0	0	0	0	0	0	0	0	0	0
GSE17721_0.5H_VS_24H_POLYIC_BMDC_UP	0	0	0	0	0	0	0	0	0	0	0	0	0	0	0
GSE21670_UNTREATED_VS_TGFB_TREATED_STAT3_KO_CD4_TCELL_UP	0	0	0	0	0	0	0	0	0	0	0	0	0	0	0
GSE23505_UNTREATED_VS_4DAY_IL6_IL1_IL23_TREATED_CD4_TCELL_DN	0	0	0	0	0	0	0	0	0	0	0	0	0	0	0
GSE25085_FETAL_LIVER_VS_FETAL_BM_SP4_THYMIC_IMPLANT_DN	0	0	0	0	0	0	0	0	0	0	0	0	0	0	0
GSE32986_GMCSF_VS_GMCSF_AND_CURDLAN_HIGHDOSE_STIM_DC_UP	0	0	0	0	0	0	0	0	0	0	0	0	0	0	0
GSE43863_TFH_VS_LY6C_LOW_CXCR5NEG_EFFECTOR_CD4_TCELL_UP	0	0	0	0	0	0	0	0	0	0	0	0	0	0	0
GO_RESPONSE_TO_KETONE	0	0	0	0	0	0	0	0	0	0	0	0.334763	0	0	0
GSE17721_4_VS_24H_CPG_BMDC_DN	0	0	0	0	0	0	0	0	0	0	0	1.05486	0	0	0
GSE22886_TH1_VS_TH2_48H_ACT_UP	0	0	0	0	0	0	0	0	0	0	0	0	0	0	0
GSE24142_EARLY_THYMIC_PROGENITOR_VS_DN2_THYMOCYTE_ADULT_UP	0	0	0	0	0	0	0	0	0	0	0	0	0	0	0
GSE360_L_DONOVANI_VS_B_MALAYI_HIGH_DOSE_DC_DN	0	0	0	0	0	0	0	0	0	0	0	0	0	0	0
GSE3982_MAC_VS_EFF_MEMORY_CD4_TCELL_UP	0	0	0	0	0	0	0	0	0	0	0	0	0	0	0
GSE7852_LN_VS_THYMUS_TCONV_UP	0	0	0	0	0	0	0	0	0	0	0	0	0	0	0
GSE5589_LPS_AND_IL10_VS_LPS_AND_IL6_STIM_IL10_KO_MACROPHAGE_45MIN_UP	0	0	0	0	0	0	0	0	0	0	0	0	0	0	0
GSE13522_CTRL_VS_T_CRUZI_G_STRAIN_INF_SKIN_UP	0	0	0	0	0	0	0	0	0	0	0	0	0	0	0
GSE17186_CD21LOW_VS_CD21HIGH_TRANSITIONAL_BCELL_CORD_BLOOD_DN	0	0	0	0	0	0	0	0	0	0	0	0	0	0	0
GSE21670_STAT3_KO_VS_WT_CD4_TCELL_DN	0	0	0	0	0	0	0	0	0	0	0	0	0	0	0
GSE25123_ROSIGLITAZONE_VS_IL4_AND_ROSIGLITAZONE_STIM_PPARG_KO_MACROPHAGE_DAY10_DN	0	0	0	0	0	0	0	0	0	0	0	0	0	0	0
GSE32986_GMCSF_VS_GMCSF_AND_CURDLAN_LOWDOSE_STIM_DC_UP	0	0	0	0	0	0	0	0	0	0	0	0	0	0	0
GSE40274_HELIOS_VS_FOXP3_AND_HELIOS_TRANSDUCED_ACTIVATED_CD4_TCELL_DN	0	0	0	0	0	0	0	0	0	0	0	0	0	0	0
GSE41867_LCMV_ARMSTRONG_VS_CLONE13_DAY15_EFFECTOR_CD8_TCELL_UP	0	0	0	0	0	0	0	0	0	0	0	0	0	0	0
GSE43863_NAIVE_VS_MEMORY_TFH_CD4_TCELL_D150_LCMV_UP	0	0	0	0	0	0	0	0	0	0	0	0	0	0	0
GSE27786_NKTCELL_VS_NEUTROPHIL_UP	0	0	0	0	0	0	0	0	0	0	0	0	0	0	0
GSE360_DC_VS_MAC_DN	0	0	0	0	0	0	0	0	0	0	0	0	0	0	0
GSE360_DC_VS_MAC_B_MALAYI_HIGH_DOSE_DN	0	0	0	0	0	0	0	0	0	0	0	0	0	0	0
GSE36476_YOUNG_VS_OLD_DONOR_MEMORY_CD4_TCELL_40H_TSST_ACT_DN	0	0	0	0	0	0	0	0	0	0	0	0	0	0	0
GSE22935_UNSTIM_VS_12H_MBOVIS_BCG_STIM_MYD88_KO_MACROPHAGE_DN	0	0	0	0	0	0	0	0	0	0	0	0	0	0	0
GSE36527_CD69_NEG_VS_POS_TREG_CD62L_LOS_KLRG1_NEG_DN	0	0	0	0	0	0	0	0	0	0	0	0	0	0	0
GSE40666_NAIVE_VS_EFFECTOR_CD8_TCELL_WITH_IFNA_STIM_90MIN_DN	0	0	0	0	0	0	0	0	0	0	0	0	0	0	0
SHEPARD_CRUSH_AND_BURN_MUTANT_UP	0	0	0	0	0	0	0	0	0	0	0	0	0	0	0
E2F1_UP.V1_DN	0	0	0	0	0	0	0	0	0	0	0	0	0	0	0
GSE17721_LPS_VS_PAM3CSK4_24H_BMDC_UP	0	0	0	0	0	0	0	0	0	0	0	0	0	0	0
GSE17721_POLYIC_VS_GARDIQUIMOD_16H_BMDC_UP	0	0	0	0	0	0	0	0	0	0	0	0	0	0	0
GSE9988_ANTI_TREM1_VS_LPS_MONOCYTE_UP	0	0	0	0	0	0	0	0	0	0	0	0	0	0	0
GSE2770_TGFB_AND_IL4_VS_IL12_TREATED_ACT_CD4_TCELL_48H_DN	0	0	0	0	0	0	0	0	0	0	0	0	0	0	0
GSE5589_LPS_VS_LPS_AND_IL10_STIM_IL10_KO_MACROPHAGE_45MIN_UP	0	0	0	0	0	0	0	0	0	0	0	0	0	0	0
GSE6674_UNSTIM_VS_ANTI_IGM_AND_CPG_STIM_BCELL_DN	0	0	0	0	0	0	0	0	0	0	0	0	0	0	0
GSE10273_HIGH_VS_LOW_IL7_TREATED_IRF4_8_NULL_PRE_BCELL_DN	0	0	0	0	0	0	0	0	0	0	0	0	0	0	0
GSE22432_MULTIPOTENT_VS_COMMON_DC_PROGENITOR_DN	0	0	0	0	0	0	0	0	0	0	0	0	0	0	0
GSE25123_WT_VS_PPARG_KO_MACROPHAGE_ROSIGLITAZONE_STIM_UP	0	0	0	0	0	0	0	0	0	0	0	0	0	0	0
GSE28726_NAIVE_CD4_TCELL_VS_NAIVE_VA24NEG_NKTCELL_DN	0	0	0	0	0	0	0	0	0	0	0	0	0	0	0
GSE45365_NK_CELL_VS_BCELL_MCMV_INFECTION_DN	0	0	0	0	0	0	0	0	0	0	0	0	0	0	0
GSE15750_DAY6_VS_DAY10_TRAF6KO_EFF_CD8_TCELL_DN	0	0	0	0	0	0	0	0	0	0	0	0	0	0	0
GSE17721_PAM3CSK4_VS_GADIQUIMOD_6H_BMDC_DN	0	0	0	0	0	0	0	0	0	0	0	0	0	0	0
GSE27786_LSK_VS_NKCELL_DN	0	0	0	0	0	0	0	0	0	0	0	0	0	0	0
GSE360_CTRL_VS_T_GONDII_MAC_UP	0	0	0	0	0	0	0	0	0	0	0	0	0	0	0
GSE5589_UNSTIM_VS_180MIN_LPS_AND_IL10_STIM_MACROPHAGE_DN	0	0	0	0	0	0	0	0	0	0	0	0	0	0	0
GSE8685_IL2_STARVED_VS_IL15_ACT_IL2_STARVED_CD4_TCELL_DN	0	0	0	0	0	0	0	0	0	0	0	0	0	0	0
GSE15330_HSC_VS_LYMPHOID_PRIMED_MULTIPOTENT_PROGENITOR_IKAROS_KO_DN	0	0	0	0	0	0	0	0	0	0	0	0	0	0	0
GSE18281_SUBCAPSULAR_VS_CENTRAL_CORTICAL_REGION_OF_THYMUS_DN	0	0	0	0	0	0	0	0	0	0	0	0.978084	0	0	0
ZWANG_EGF_INTERVAL_DN	0	0	0	0	0	0	0	0	0	0	0	0	0	0	0
GSE22886_TCELL_VS_BCELL_NAIVE_UP	0	0	0	0	0	0	0	0	0	0	0	0	0	0	0
GSE5589_LPS_AND_IL10_VS_LPS_AND_IL6_STIM_IL6_KO_MACROPHAGE_45MIN_UP	0	0	0	0	0	0	0	0	0	0	0	0	0	0	0
GSE5589_IL6_KO_VS_IL10_KO_LPS_AND_IL6_STIM_MACROPHAGE_45MIN_UP	0	0	0	0	0	0	0	0	0	0	0	0	0	0	0
GSE3920_UNTREATED_VS_IFNA_TREATED_FIBROBLAST_DN	0	0	0	0	0	0	0	0	0	0	0	0	0	0	0
GSE19923_HEB_KO_VS_HEB_AND_E2A_KO_DP_THYMOCYTE_DN	0	0	0	0	0	0	0	0	0	0	0	0	0	0	0
GSE20500_CTRL_VS_RARA_ANTAGONIST_TREATED_CD4_TCELL_UP	0	0	0	0	0	0	0	0	0	0	0	0	0	0	0
GSE22935_UNSTIM_VS_12H_MBOVIS_BCG_STIM_MACROPHAGE_UP	0	0	0	0	0	0	0	0	0	0	0	0.220827	0	0	0
GSE24574_NAIVE_VS_TCONV_CD4_TCELL_UP	0	0	0	0	0	0	0	0	0	0	0	0	0	0	0
GSE32034_LY6C_HIGH_VS_LOW_ROSIGLIZATONE_TREATED_MONOCYTE_UP	0	0	0	0	0	0	0	0	0	0	0	0.220827	0	0	0
GSE36826_NORMAL_VS_STAPH_AUREUS_INF_SKIN_DN	0	0	0	0	0	0	0	0	0	0	0	0.95298	0	0	0
GSE43955_1H_VS_42H_ACT_CD4_TCELL_WITH_TGFB_IL6_UP	0	0	0	0	0	0	0	0	0	0	0	0	0	0	0
GSE43955_TH0_VS_TGFB_IL6_IL23_TH17_ACT_CD4_TCELL_60H_DN	0	0	0	0	0	0	0	0	0	0	0	0	0	0	0
GSE1448_ANTI_VALPHA2_VS_VBETA5_DP_THYMOCYTE_DN	0	0	0	0	0	0	0	0	0	0	0	0	0	0	0
GSE15767_MED_VS_SCS_MAC_LN_UP	0	0	0	0	0	0	0	0	0	0	0	0.198423	0	0	0
GSE17721_CTRL_VS_GARDIQUIMOD_1H_BMDC_UP	0	0	0	0	0	0	0	0	0	0	0	0	0	0	0
GSE20366_TREG_VS_NAIVE_CD4_TCELL_DEC205_CONVERSION_UP	0	0	0	0	0	0	0	0	0	0	0	0	0	0	0
GSE22886_NAIVE_VS_IGG_IGA_MEMORY_BCELL_DN	0	0	0	0	0	0	0	0	0	0	0	0	0	0	0
GSE3920_UNTREATED_VS_IFNB_TREATED_ENDOTHELIAL_CELL_UP	0	0	0	0	0	0	0	0	0	0	0	0	0	0	0
GSE19923_E2A_KO_VS_HEB_AND_E2A_KO_DP_THYMOCYTE_UP	0	0	0	0	0	0	0	0	0	0	0	0	0	0	0
GSE20198_IL12_VS_IL12_IL18_TREATED_ACT_CD4_TCELL_UP	0	0	0	0	0	0	0	0	0	0	0	0	0	0	0
GSE21360_PRIMARY_VS_TERTIARY_MEMORY_CD8_TCELL_UP	0	0	0	0	0	0	0	0	0	0	0	0	0	0	0
GSE22589_HIV_VS_HIV_AND_SIV_INFECTED_DC_UP	0	0	0	0	0	0	0	0	0	0	0	0	0	0	0
GSE23398_WT_VS_IL2_KO_CD4_TCELL_SCURFY_MOUSE_UP	0	0	0	0	0	0	0	0	0	0	0	0	0	0	0
GSE29949_MICROGLIA_BRAIN_VS_CD8_POS_DC_SPLEEN_UP	0	0	0	0	0	0	0	0	0	0	0	0	0	0	0
GSE37533_UNTREATED_VS_PIOGLIZATONE_TREATED_CD4_TCELL_PPARG1_AND_FOXP3_TRASDUCED_DN	0	0	0	0	0	0	0	0	0	0	0	0	0	0	0
GSE17721_CTRL_VS_PAM3CSK4_12H_BMDC_UP	0	0	0	0	0	0	0	0	0	0	0	0	0	0	0
GSE17721_0.5H_VS_4H_CPG_BMDC_DN	0	0	0	0	0	0	0	0	0	0	0	0	0	0	0
GSE22886_CD8_TCELL_VS_BCELL_NAIVE_UP	0	0	0	0	0	0	0	0	0	0	0	0	0	0	0
GSE24142_EARLY_THYMIC_PROGENITOR_VS_DN2_THYMOCYTE_FETAL_UP	0	0	0	0	0	0	0	0	0	0	0	0	0	0	0
GSE27786_NKTCELL_VS_ERYTHROBLAST_UP	0	0	0	0	0	0	0	0	0	0	0	0	0	0	0
GSE7460_FOXP3_MUT_VS_HET_ACT_TCONV_UP	0	0	0.11688	0	0	0	0	0	0	0	0	0	0	0	0
GSE8921_UNSTIM_VS_TLR1_2_STIM_MONOCYTE_24H_DN	0	0	0	0	0	0	0	0	0	0	0	0	0	0	0
GSE3039_ALPHABETA_CD8_TCELL_VS_B2_BCELL_DN	0	0	0	0	0	0	0	0	0	0	0	0	0	0	0
GSE7831_1H_VS_4H_CPG_STIM_PDC_DN	0	0	0	0	0	0	0	0	0	0	0	0	0	0	0
GSE15330_WT_VS_IKAROS_KO_HSC_UP	0	0	0	0	0	0	0	0	0	0	0	0	0	0	0
GSE15330_LYMPHOID_MULTIPOTENT_VS_GRANULOCYTE_MONOCYTE_PROGENITOR_IKAROS_KO_DN	0	0	0	0	0	0	0	0	0	0	0	0	0	0	0
GSE16385_UNTREATED_VS_12H_ROSIGLITAZONE_IL4_TREATED_MACROPHAGE_UP	0	0	0	0	0	0	0	0	0	0	0	0	0	0	0
GSE37301_LYMPHOID_PRIMED_MPP_VS_GRAN_MONO_PROGENITOR_UP	0	0	0	0	0	0	0	0	0	0	0	0	0	0	0
GSE36826_NORMAL_VS_STAPH_AUREUS_INF_SKIN_UP	0	0	0	0	0	0	0	0	0	0	0	0	0	0	0
GSE45365_NK_CELL_VS_CD8_TCELL_MCMV_INFECTION_UP	0	0	0	0	0	0	0	0	0	0	0	0.176281	0.535196	0	0
GSE15930_NAIVE_VS_48H_IN_VITRO_STIM_CD8_TCELL_UP	0	0	0	0	0	0	0	0	0	0	0	0	0	0	0
GSE17721_LPS_VS_PAM3CSK4_4H_BMDC_UP	0	0	0	0	0	0	0	0	0	0	0	0	0	0	0
GSE24634_NAIVE_CD4_TCELL_VS_DAY3_IL4_CONV_TREG_DN	0	0	0	0	0	0	0	0	0	0	0	0	0	0	0
GSE27786_LSK_VS_LIN_NEG_CELL_UP	0	0	0	0	0	0	0	0	0	0	0	0	0	0	0
GSE39820_CTRL_VS_TGFBETA1_IL6_IL23A_CD4_TCELL_DN	0	0	0	0	0	0	0	0	0	0	0	0	0	0	0
GSE22601_IMMATURE_CD4_SINGLE_POSITIVE_VS_CD8_SINGLE_POSITIVE_THYMOCYTE_DN	0	0	0	0	0	0	0	0	0	0	0	0	0	0	0
GSE43955_1H_VS_60H_ACT_CD4_TCELL_WITH_TGFB_IL6_UP	0	0	0	0	0	0	0	0	0	0	0	0	0	0	0
GSE44649_WT_VS_MIR155_KO_ACTIVATED_CD8_TCELL_UP	0	0	0	0	0	0	0	0	0	0	0	0.154297	0	0	0
GSE27786_LIN_NEG_VS_NKTCELL_DN	0	0	0	0	0	0	0	0	0	0	0	0	0	0	0
GSE3337_CTRL_VS_4H_IFNG_IN_CD8POS_DC_DN	0	0	0	0	0	0	0	0	0	0	0	0	0	0	0
GSE360_DC_VS_MAC_L_DONOVANI_DN	0	0	0	0	0	0	0	0	0	0	0	0	0	0	0
GSE7460_WT_VS_FOXP3_HET_ACT_TCONV_UP	0	0	0	0	0	0	0	0	0	0	0	0	0	0	0
GSE9006_HEALTHY_VS_TYPE_1_DIABETES_PBMC_4MONTH_POST_DX_UP	0	0	0	0	0	0	0	0	0	0	0	0	0	0	0
GSE5679_CTRL_VS_PPARG_LIGAND_ROSIGLITAZONE_AND_RARA_AGONIST_AM580_TREATED_DC_DN	0	0	0	0	0	0	0	0	0	0	0	0.132372	0	0	0
GSE8621_UNSTIM_VS_LPS_PRIMED_AND_LPS_STIM_MACROPHAGE_UP	0	0	0	0	0	0	0	0	0	0	0	0.132372	0	0	0
GSE10240_CTRL_VS_IL17_STIM_PRIMARY_BRONCHIAL_EPITHELIAL_CELLS_DN	0	0	0	0	0	0	0	0	0	0	0	0	0	0	0
GSE40666_NAIVE_VS_EFFECTOR_CD8_TCELL_WITH_IFNA_STIM_90MIN_UP	0	0	0	0	0	0	0	0	0	0	0	0	0	0	0
GSE40068_CXCR5NEG_BCL6NEG_CD4_TCELL_VS_CXCR5POS_BCL6NEG_TFH_DN	0	0	0	0	0	0	0	0	0	0	0	0	0	0	0
GSE11961_FOLLICULAR_BCELL_VS_GERMINAL_CENTER_BCELL_DAY40_DN	0	0	0	0	0	0	0	0	0	0	0	0	0	0	0
GSE43700_UNTREATED_VS_IL10_TREATED_PBMC_DN	0	0	0	0	0	0	0	0	0	0	0	0	0	0	0
GSE15930_STIM_VS_STIM_AND_IFNAB_48H_CD8_T_CELL_UP	0	0	0	0	0	0	0	0	0	0	0	0	0	0	0
GSE17721_0.5H_VS_12H_CPG_BMDC_DN	0	0	0	0	0	0	0	0	0	0	0	0	0	0	0
GSE20715_0H_VS_24H_OZONE_TLR4_KO_LUNG_UP	0	0	0	0	0	0	0	0	0	0	0	0	0	0	0
GSE7852_TREG_VS_TCONV_LN_UP	0	0	0	0	0	0	0	0	0	0	0	0	0	0	0
GSE5589_LPS_VS_LPS_AND_IL6_STIM_MACROPHAGE_45MIN_UP	0	0	0	0	0	0	0	0	0	0	0	0	0	0	0
GSE22935_WT_VS_MYD88_KO_MACROPHAGE_24H_MBOVIS_BCG_STIM_DN	0	0	0	0	0	0	0	0	0	0	0	0	0	0	0
GSE26030_UNSTIM_VS_RESTIM_TH1_DAY15_POST_POLARIZATION_UP	0	0	0	0	0	0	0	0	0	0	0	0	0	0	0
GSE43955_1H_VS_20H_ACT_CD4_TCELL_WITH_TGFB_IL6_DN	0	0	0	0	0	0	0	0	0	0	0	0	0	0	0
GSE17721_0.5H_VS_4H_POLYIC_BMDC_UP	0	0	0	0	0	0	0	0	0	0	0	0	0	0	0
GSE17721_0.5H_VS_24H_POLYIC_BMDC_DN	0	0	0	0	0	0	0	0	0	0	0	0	0	0	0
GSE17721_0.5H_VS_12H_CPG_BMDC_UP	0	0	0	0	0	0	0	0	0	0	0	0	0	0	0
GSE22601_DOUBLE_POSITIVE_VS_CD8_SINGLE_POSITIVE_THYMOCYTE_UP	0	0	0	0	0	0	0	0	0	0	0	0	0	0	0
GSE17186_BLOOD_VS_CORD_BLOOD_CD21LOW_TRANSITIONAL_BCELL_UP	0	0	0	0	0	0	0	0	0	0	0	0	0	0	0
GSE23568_ID3_TRANSDUCED_VS_ID3_KO_CD8_TCELL_UP	0	0	0	0	0	0	0	0	0	0	0	0	0	0	0
GSE37301_LYMPHOID_PRIMED_MPP_VS_COMMON_LYMPHOID_PROGENITOR_DN	0	0	0	0	0	0	0	0	0	0	0	0	0	0	0
GSE43955_1H_VS_20H_ACT_CD4_TCELL_UP	0	0	0	0	0	0	0	0	0	0	0	0.0892124	0	0	0
GSE17721_POLYIC_VS_GARDIQUIMOD_6H_BMDC_UP	0	0	0	0	0	0	0	0	0	0	0	0	0	0	0
GSE43955_TH0_VS_TGFB_IL6_TH17_ACT_CD4_TCELL_1H_DN	0	0	0	0	0	0	0	0	0	0	0	0	0	0	0
GSE43863_TFH_VS_LY6C_INT_CXCR5POS_EFFECTOR_CD4_TCELL_UP	0	0	0	0	0	0	0	0	0	0	0	0	0	0	0
TONKS_TARGETS_OF_RUNX1_RUNX1T1_FUSION_MONOCYTE_UP	0	0	0	0	0	0	0	0	0	0	0	0	0	0	0
GSE17721_POLYIC_VS_PAM3CSK4_6H_BMDC_UP	0	0	0	0	0	0	0	0	0	0	0	0	0	0	0
GSE35825_UNTREATED_VS_IFNG_STIM_MACROPHAGE_UP	0	0	0	0	0	0	0	0	0	0	0	0	0	0	0
GSE1432_1H_VS_24H_IFNG_MICROGLIA_UP	0	0	0	0	0	0	0	0	0	0	0	1.48254	0	0	0
GSE17721_POLYIC_VS_CPG_1H_BMDC_DN	0	0	0	0	0	0	0	0	0	0	0	0	0	0	0
GSE20715_0H_VS_48H_OZONE_TLR4_KO_LUNG_UP	0	0	0	0	0	0	0	0	0	0	0	0	0	0	0
GSE43955_TGFB_IL6_VS_TGFB_IL6_IL23_TH17_ACT_CD4_TCELL_52H_DN	0	0	0	0	0	0	0	0	0	0	0	0	0	0	0
GSE7852_LN_VS_FAT_TCONV_DN	0	0	0	0	0	0	0	0	0	0	0	0	0	0	0
GSE35685_CD34POS_CD10NEG_CD62LPOS_VS_CD34POS_CD10POS_BONE_MARROW_UP	0	0	0	0	0	0	0	0	0	0	0	0	0	0	0
GSE26156_DOUBLE_POSITIVE_VS_CD4_SINGLE_POSITIVE_THYMOCYTE_DN	0	0	0	0	0	0	0	0	0	0	0	0	0.336353	0	0
GSE46606_UNSTIM_VS_CD40L_IL2_IL5_1DAY_STIMULATED_IRF4MID_SORTED_BCELL_UP	0	0	0	0	0	0	0	0	0	0	0	0	0	0	0
GSE43955_10H_VS_30H_ACT_CD4_TCELL_DN	0	0	0	0	0	0	0	0	0	0	0	0	0	0	0
GSE43955_1H_VS_42H_ACT_CD4_TCELL_WITH_TGFB_IL6_DN	0	0	0	0	0	0	0	0	0	0	0	0	0	0	0
GO_CELL_CELL_ADHESION_VIA_PLASMA_MEMBRANE_ADHESION_MOLECULES	0	0	0	0	0	0	0	0	0	0	0	0	0	0	0
MODULE_105	0	0	0	0	0	0	0	0	0	0	0	0	0	0	0
BOQUEST_STEM_CELL_DN	0	0	0	0	0	0	0	0	0	0	0	0	0	0	0
MORF_RBBP8	0	0	0	0	0	0	0	0	0	0	0	0	0	0	0
KEGG_FOCAL_ADHESION	0	0	0	0	0	0	0	0	0	0	0	0	0	0	0
GSE339_EX_VIVO_VS_IN_CULTURE_CD8POS_DC_DN	0	0	0	0	0	0	0	0	0	0	0	0	0	0	0
SENESE_HDAC1_AND_HDAC2_TARGETS_UP	0	0	0	0	0	0	0	0	0	0	0	0	0	0	0
V$CREB_Q2_01	0	0	0	0	0	0	0	0	0	0	0	0	0	0	0
GO_PROTEIN_FOLDING	0	0	0	0	0	0	0	0	0	0	0	0	0	0	0
V$SRF_Q4	0	0	0	0	0	0	0	0	0	0	0	0	0	0	0
GRAESSMANN_APOPTOSIS_BY_SERUM_DEPRIVATION_DN	0	0	0	0	0	0	0	0	0	0	0	0	0	0	0
V$STAT1_03	0	0	0	0	0	0	0	0	0	0	0	0	0	0	0
GO_ENDOCYTIC_VESICLE	0	0	0	0	0	0	0	0	0	0	0	0	0	0	0
V$ISRE_01	0	0	0	0	0	0	0	0	0	0	0	0	0	0	0
V$NERF_Q2	0	0	0	0	0	0	0	0	0	0	0	0	0	0	0
V$ETS1_B	0	0	0	0	0	0	0	0	0	0	0	0	0	0	0
GO_POSITIVE_REGULATION_OF_INTRACELLULAR_PROTEIN_TRANSPORT	0	0	0	0	0	0	0	0	0	0	0	0	0	0	0
V$USF2_Q6	0	0	0	0	0	0	0	0	0	0	0	0	0	0	0
V$AP2_Q3	0	0	0	0	0	0	0	0	0	0	0	0	0	0	0
MORF_DDB1	0	0	0	0	0	0	0	0	0	0	0	0	0	0	0
REACTOME_AXON_GUIDANCE	0	0	0	0	0	0	0	0	0	0	0	0	0	0	0
V$WHN_B	0	0	0	0	0	0	0	0	0	0	0	0	0	0	0
V$AP1_Q2	0	0	0	0	0	0	0	0	0	0	0	0	0	0	0
V$CEBPB_01	0	0	0	0	0	0	0	0	0	0	0	0	0	0	0
V$AREB6_01	0	0	0	0	0	0	0	0	0	0	0	0	0	0	0
V$USF_C	0	0	0	0	0	0	0	0	0	0	0	0	0	0	0
V$COREBINDINGFACTOR_Q6	0	0	0	0	0	0	0	0	0	0	0	0	0	0	0
GO_PROTEASOMAL_PROTEIN_CATABOLIC_PROCESS	0	0	0	0	0	0	0	0	0	0	0	0	0	0	0
GO_ACTIVATION_OF_PROTEIN_KINASE_ACTIVITY	0	0	0	0	0	0	0	0	0	0	0	0	0	0	0
GO_REGULATION_OF_CELLULAR_PROTEIN_CATABOLIC_PROCESS	0	0.0295269	0	0	0	0	0	0	0	0	0	0	0	0	0
BRUINS_UVC_RESPONSE_EARLY_LATE	0	0	0	0	0	0	0	0	0	0	0	0	0	0	0
GO_NEGATIVE_REGULATION_OF_PROTEOLYSIS	0	0	0	0	0	0	0	0	0	0	0	0	0	0	0
chr1p36	0	0	0	0	0	0	0	0	0	0	0	0	0	0	0
MODULE_151	0	0	0	0	0	0	0	0	0	0	0	0	0	0	0
TTCYRGAA_UNKNOWN	0	0	0	0	0	0	0	0	0	0	0	0	0	0	0
MODULE_212	0	0	0	0	0	0	0	0	0	0	0	0	4.04764	0	0
CACTGTG,MIR-128A,MIR-128B	0	0	0	0	0	0	0	0	0	0	0	0	0	0	0
GO_COFACTOR_METABOLIC_PROCESS	0	0	0	0	0	0	0	0	0	0	0	0	2.48966	0	0
GO_REGULATION_OF_DNA_METABOLIC_PROCESS	0	0	0	0	0	0	0	0	0	0	0	0	0	0	0
CTCAGGG,MIR-125B,MIR-125A	0	0	0	0	0	0	0	0	0	0	0	0	0	0	0
PEREZ_TP63_TARGETS	0	0	0	0	0	0	0	0	0	0	0	0	0	0	0
GOLDRATH_ANTIGEN_RESPONSE	0	0	0	0	0	0	0	0	0	0	0	0	0	0	0
ZHOU_INFLAMMATORY_RESPONSE_LIVE_DN	0	0	0	0	0	0	0	0	0	0	0	0	0	0	0
GO_CELLULAR_AMINO_ACID_METABOLIC_PROCESS	0	0	0	0	0	0	0	0	0	0	0	0	0.137399	0	0
GO_REGULATION_OF_CELLULAR_AMIDE_METABOLIC_PROCESS	0	0	0	0	0	0	0	0	0	0	0	0	0	0	0
MODULE_99	0	0	0	0	0	0	0	0	0	0	0	0	0	0	0
CTAWWWATA_V$RSRFC4_Q2	0	0	0	0	0	0	0	0	0	0	0	0	0	0	0
GO_ORGANIC_ANION_TRANSPORT	0	0	0	0	0	0	0	0.343189	0	0	0	0	0	0	0
KOYAMA_SEMA3B_TARGETS_DN	0	0	0	0	0	0	0	0	0	0	0	0	0	0	0
GO_GUANYL_NUCLEOTIDE_BINDING	0	0	0	0	0	0	0	0	0	0	0	0	0	0	0
GO_NEGATIVE_REGULATION_OF_ORGANELLE_ORGANIZATION	0	0	0	0	0	0	0	0	0	0	0	0	0	0	0
GO_MITOCHONDRIAL_MATRIX	0	0	0	0	0	0	0	2.36151	0	0	0	0	0	0	0
MOHANKUMAR_TLX1_TARGETS_UP	0	0	0	0	0	0	0	0	0	0	0	0	0	0	0
ACTAYRNNNCCCR_UNKNOWN	0	0	0	0	0	0	0	0	0	0	0	0	0	0	0
CUI_TCF21_TARGETS_2_UP	0	0	0	0	0	0	0	0.174532	0	0	0	0	0	0	0
RGAANNTTC_V$HSF1_01	0	0	0	0	0	0	0	0	0	0	0	0	0	0	0
GO_REGULATION_OF_HOMEOSTATIC_PROCESS	0	0	0	0	0	0	0	0	0	0	0	0	0	0	0
TGCACTT,MIR-519C,MIR-519B,MIR-519A	0	0	0	0	0	0	0	0	0	0	0	0	0	0	0
GO_REGULATION_OF_HORMONE_LEVELS	0	0	0	0	0	0	0	0	0	0	0	0	0.22999	0	0
TGAATGT,MIR-181A,MIR-181B,MIR-181C,MIR-181D	0	0	0	0	0	0	0	0	0	0	0	0	0	0	0
GO_ENDOMEMBRANE_SYSTEM_ORGANIZATION	0	0	0	0	0	0	0	0	0	0	0	0	0	0	0
TTTGCAC,MIR-19A,MIR-19B	0	0	0	0	0	0	0	0	0	0	0	0	0	0	0
GO_ORGANELLE_INNER_MEMBRANE	0	0	0	0	0	0	0	4.51938	0	0	0	0	0	0	0
YCATTAA_UNKNOWN	0	0	0	0	0	0	0	0	0	0	0	0	0	0	0
FLECHNER_BIOPSY_KIDNEY_TRANSPLANT_OK_VS_DONOR_UP	0	0	0	0	0	0	0	0	0	0	0	0	0	0	0
GO_REGULATION_OF_CELL_MORPHOGENESIS	0	0	0	0	0	0	0	0	0	0	0	0	0	0	0
GO_CELLULAR_CHEMICAL_HOMEOSTASIS	0	0	0	0	0	0	0	0	0	0	0	0	0	0	0
GO_METAL_ION_TRANSPORT	0	0	0	0	0	0	0	0	0	0	0	0	0	0	0
RODRIGUES_THYROID_CARCINOMA_POORLY_DIFFERENTIATED_UP	0	0	0	0	0	0	0	0	0	0	0	0	0	0	0
GO_SYNAPSE	0	0	0	0	0	0	0	0	0	0	0	0	1.20403	0	0
GO_ENDOTHELIUM_DEVELOPMENT	0	0	0	0	0	0	1.95096	0	0	0	0	0	0	0	0
GNF2_CASP1	0	0	0	0	0	0	1.47197	0	0	0	0	0.971085	0	0	0
ACOSTA_PROLIFERATION_INDEPENDENT_MYC_TARGETS_DN	0	0	0	0	0	0	1.30617	0	0	0	0	0	0	0	0
GO_POSITIVE_REGULATION_OF_LEUKOCYTE_MIGRATION	0	0	0	0	0	0	1.30617	0	0	0	0	0	0	0	0
REACTOME_TOLL_RECEPTOR_CASCADES	0	0	0	0	0	0	0.753009	0	0	0	0	0	0	0	0
GSE13522_CTRL_VS_T_CRUZI_G_STRAIN_INF_SKIN_DN	0	0	0	0	0	0	0.0742961	0	0	0	0	0	0	0	0
REACTOME_INTERFERON_SIGNALING	0	0	0	0	0	0	0	0	0	0	0	0	0	0	0
GO_REGULATION_OF_RESPONSE_TO_CYTOKINE_STIMULUS	0	0	0	0	0	0	0	0	0	0	0	0	0	0	0
MORF_PML	0	0	0	0	0	0	0	0	0	0	0	0	0	0	0
GO_REGULATION_OF_REACTIVE_OXYGEN_SPECIES_METABOLIC_PROCESS	0	0	0	0	0	0	0	0	0	0	0	0.521216	0	0	0
GSE6092_CTRL_VS_BORRELIA_BIRGDOFERI_INF_ENDOTHELIAL_CELL_DN	0	0	0	0	0	0	0	0	0	0	0	0	0	0	0
SMIRNOV_CIRCULATING_ENDOTHELIOCYTES_IN_CANCER_UP	0	0	0	0	0	0	0	0	0	0	0	2.13064	0	0	0
LIU_CMYB_TARGETS_UP	0	0	0	0	0	0	0	0	0	0	0	0	0	0	0
GSE17974_0H_VS_1H_IN_VITRO_ACT_CD4_TCELL_UP	0	0	0	0	0	0	0	0	0	0	0	0	0	0	0
GSE6269_HEALTHY_VS_FLU_INF_PBMC_UP	0	0	0	0	0	0	0	0	0	0	0	0	0	0	0
GSE16385_IL4_VS_ROSIGLITAZONE_STIM_MACROPHAGE_DN	0	0	0	0	0	0	0	0	0	0	0	0	0	0	0
GO_MONOCARBOXYLIC_ACID_BIOSYNTHETIC_PROCESS	0	0	0	0	0	0	0	0	0	0	0	0	0	0	0
GSE17974_CTRL_VS_ACT_IL4_AND_ANTI_IL12_1H_CD4_TCELL_DN	0	0	0	0	0	0	0	0	0	0	0	0	0	0	0
GSE12845_IGD_POS_BLOOD_VS_NAIVE_TONSIL_BCELL_UP	0	0	0	0	0	0	0	0	0	0	0	0	0	0	0
GSE10325_LUPUS_CD4_TCELL_VS_LUPUS_BCELL_DN	0	0	0	0	0	0	0	0	0	0	0	0	0	0	0
GSE45365_WT_VS_IFNAR_KO_CD8A_DC_MCMV_INFECTION_DN	0	0	0	0	0	0	0	0	0	0	0	0	0	0	0
GSE7348_UNSTIM_VS_TOLERIZED_AND_LPS_STIM_MACROPHAGE_DN	0	0	0	0	0	0	0	0	0	0	0	0	0	0	0
GSE13547_WT_VS_ZFX_KO_BCELL_ANTI_IGM_STIM_2H_DN	0	0	0	0	0	0	0	0	0	0	0	0	0	0	0
GSE42021_TREG_PLN_VS_CD24LO_TREG_THYMUS_DN	0	0	0	0	0	0	0	0	0	0	0	0	0	0	0
MORF_FANCG	0	0	0	0	0	0	0	0	0	0	0	0	0	0	0
GSE6259_BCELL_VS_CD4_TCELL_UP	0	0	0	0	0	0	0	0	0	0	0	0	0	0	0
GSE18791_UNSTIM_VS_NEWCATSLE_VIRUS_DC_10H_DN	0	0	0	0	0	0	0	0	0	0	0	0	0	0	0
GSE10325_CD4_TCELL_VS_BCELL_DN	0	0	0	0	0	0	0	0	0	0	0	0	0	0	0
GSE14000_UNSTIM_VS_4H_LPS_DC_TRANSLATED_RNA_DN	0	0	0	0	0	0	0	0	0	0	0	0	0	0	0
GO_REGULATION_OF_BLOOD_PRESSURE	0	0	0	0	0	0	0	0.344253	0	0	0	0	0	0	0
GSE21033_CTRL_VS_POLYIC_STIM_DC_1H_UP	0	0	0	0	0	0	0	0	0	0	0	0	0	0	0
GSE1432_1H_VS_24H_IFNG_MICROGLIA_DN	0	0	0	0	0	0	0	0	0	0	0	0	0	0	0
GSE22886_DAY0_VS_DAY7_MONOCYTE_IN_CULTURE_UP	0	0	0	0	0	0	0	0	0	0	0	0	0	0	0
GSE35825_UNTREATED_VS_IFNA_STIM_MACROPHAGE_DN	0	0	0	0	0	0	0	0	0	0	0	0	0	0	0
GSE17322_CD103_POS_VS_CD11B_HIGH_LUNG_DC_UP	0	0	0	0	0	0	0	0	0	0	0	0	0	0	0
GSE42021_TREG_VS_TCONV_PLN_UP	0	0	0	0	0	0	0	0	0	0	0	0	0	0	0
IWANAGA_CARCINOGENESIS_BY_KRAS_PTEN_UP	0	0	0	0	0	0	0	0	0	0	0	0	0	0	0
GSE11864_UNTREATED_VS_CSF1_IN_MAC_UP	0	0	0	0	0	0	0	0	0	0	0	0	0	0	0
GSE17974_0H_VS_2H_IN_VITRO_ACT_CD4_TCELL_UP	0	0	0	0	0	0	0	0	0	0	0	0.679698	0	0	0
GSE17974_0H_VS_4H_IN_VITRO_ACT_CD4_TCELL_UP	0	0	0	0	0	0	0	0	0	0	0	0.679698	0	0	0
GSE17974_CTRL_VS_ACT_IL4_AND_ANTI_IL12_72H_CD4_TCELL_UP	0	0	0	0	0	0	0	0	0	0	0	0	0	0	0
GSE2770_IL12_AND_TGFB_ACT_VS_ACT_CD4_TCELL_2H_DN	0	0	0	0	0	0	0	0	0	0	0	0	0	0	0
GSE7218_UNSTIM_VS_ANTIGEN_STIM_THROUGH_IGG_BCELL_DN	0	0	0	0	0	0	0	0	0	0	0	0.679698	0	0	0
GSE27859_MACROPHAGE_VS_DC_UP	0	0	0	0	0	0	0	0	0	0	0	0.653776	0	0	0
GSE30971_WBP7_HET_VS_KO_MACROPHAGE_DN	0	0	0	0	0	0	0	0	0	0	0	0	0	0	0
GSE37533_PPARG1_FOXP3_VS_FOXP3_TRANSDUCED_CD4_TCELL_DN	0	0	0	0	0	0	0	0	0	0	0	0	0	0	0
GSE24671_CTRL_VS_BAKIMULC_INFECTED_MOUSE_SPLENOCYTES_DN	0	0	0	0	0	0	0	0	0	0	0	0	0	0	0
GSE13484_UNSTIM_VS_YF17D_VACCINE_STIM_PBMC_DN	0	0	0	0	0	0	0	0	0	0	0	0	0	0	0
GSE411_WT_VS_SOCS3_KO_MACROPHAGE_IL6_STIM_400MIN_DN	0	0	0	0	0	0	0	0	0	0	0	0	0	0	0
GSE9509_10MIN_VS_30MIN_LPS_AND_IL10_STIM_IL10_KO_MACROPHAGE_UP	0	0	0	0	0	0	0	0	0	0	0	0	0	0	0
GSE11973_MIR223_KOVS_WT_BONE_MARROW_NEUTROPHIL_DN	0	0	0	0	0	0	0	0	0	0	0	0	0	0	0
GSE37301_HEMATOPOIETIC_STEM_CELL_VS_CD4_TCELL_UP	0	0	0	0	0	0	0	0	0	0	0	0	0	0	0
GSE37533_PPARG1_FOXP3_VS_PPARG2_FOXP3_TRANSDUCED_CD4_TCELL_UP	0	0	0	0	0	0	0	0	0	0	0	0	0	0	0
GSE42724_MEMORY_VS_B1_BCELL_DN	0	0	0	0	0	0	0	0	0	0	0	0.577249	0	0	0
GSE17974_2.5H_VS_72H_IL4_AND_ANTI_IL12_ACT_CD4_TCELL_DN	0	0	0	0	0	0	0	0	0	0	0	0	0	0	0
GSE1925_CTRL_VS_24H_IFNG_STIM_MACROPHAGE_DN	0	0	0	0	0	0	0	0	0	0	0	0	0	0	0
GSE9960_HEALTHY_VS_GRAM_POS_SEPSIS_PBMC_DN	0	0	0	0	0	0	0	0	0	0	0	0	0	0	0
GSE34205_HEALTHY_VS_FLU_INF_INFANT_PBMC_DN	0	0	0	0	0	0	0	0	0	0	0	0	0	0	0
GSE7460_WT_VS_FOXP3_HET_ACT_WITH_TGFB_TCONV_UP	0	0	0	0	0	0	0	0	0	0	0	0	0	0	0
GSE2770_IL12_VS_TGFB_AND_IL12_TREATED_ACT_CD4_TCELL_6H_UP	0	0	0	0	0	0	0	0	0	0	0	0	0	0	0
GSE9960_GRAM_NEG_VS_GRAM_POS_SEPSIS_PBMC_DN	0	0	0	0	0	0	0	0	0	0	0	0	0	0	0
GSE25123_CTRL_VS_ROSIGLITAZONE_STIM_PPARG_KO_MACROPHAGE_UP	0	0	0	0	0	0	0	0	0	0	0	0	0	0	0
GSE3982_DC_VS_TH2_UP	0	0	0	0	0	0	0	0	0	0	0	0	0	0	0
GSE411_WT_VS_SOCS3_KO_MACROPHAGE_DN	0	0	0	0	0	0	0	0	0	0	0	0	0	0	0
GSE12392_IFNAR_KO_VS_IFNB_KO_CD8_NEG_SPLEEN_DC_UP	0	0	0	0	0	0	0	0	0	0	0	0	0	0	0
KEGG_CHEMOKINE_SIGNALING_PATHWAY	0	0	0	0	0	0	0	0	0	0	0	0	0	0	0
GSE14308_NAIVE_CD4_TCELL_VS_NATURAL_TREG_DN	0	0	0	0	0	0	0	0	0	0	0	0	0	0	0
GSE17974_CTRL_VS_ACT_IL4_AND_ANTI_IL12_12H_CD4_TCELL_DN	0	0	0	0	0	0	0	0	0	0	0	0	0	0	0
GSE17974_0.5H_VS_72H_UNTREATED_IN_VITRO_CD4_TCELL_DN	0	0	0	0	0	0	0	0	0	0	0	0	0	0	0
GSE3982_DC_VS_NEUTROPHIL_DN	0	0	0	0	0	0	0	0	0	0	0	0	0	0	0
GSE3982_NEUTROPHIL_VS_BCELL_UP	0	0	0	0	0	0	0	0	0	0	0	0	0	0	0
GSE20152_SPHK1_KO_VS_WT_HTNFA_OVERXPRESS_ANKLE_UP	0	0	0	0	0	0	0	0	0	0	0	0	0	0	0
GSE22611_UNSTIM_VS_2H_MDP_STIM_MUTANT_NOD2_TRANSDUCED_HEK293T_CELL_UP	0	0	0	0	0	0	0	0	0	0	0	0	0	0	0
GSE32533_WT_VS_MIR17_OVEREXPRESS_ACT_CD4_TCELL_UP	0	0	0	0	0	0	0	0	0	0	0	0	0	0	0
GSE32986_CURDLAN_LOWDOSE_VS_CURDLAN_HIGHDOSE_STIM_DC_UP	0	0	0	0	0	0	0	0	0	0	0	1.24091	0	0	0
GAUSSMANN_MLL_AF4_FUSION_TARGETS_F_UP	0	0	0	0	0	0	0	0	0	0	0	0	0	0	0
GSE17721_POLYIC_VS_PAM3CSK4_16H_BMDC_DN	0	0	0	0	0	0	0	0	0	0	0	0	0	0	0
GSE18791_CTRL_VS_NEWCASTLE_VIRUS_DC_14H_UP	0	0	0	0	0	0	0	0	0	0	0	0	0	0	0
GSE32423_MEMORY_VS_NAIVE_CD8_TCELL_UP	0	0	0	0	0	0	0	0	0	0	0	0.45348	0	0	0
GSE3982_DC_VS_NEUTROPHIL_LPS_STIM_DN	0	0	0	0	0	0	0	0	0	0	0	0	0	0	0
GSE3565_CTRL_VS_LPS_INJECTED_SPLENOCYTES_UP	0	0	0	0	0	0	0	0	0	0	0	0	0	0	0
GSE15330_HSC_VS_GRANULOCYTE_MONOCYTE_PROGENITOR_UP	0	0	0	0	0	0	0	0	0	0	0	0	0	0	0
GSE21360_NAIVE_VS_SECONDARY_MEMORY_CD8_TCELL_UP	0	0	0	0	0	0	0	0	0	0	0	0	0	0	0
GSE23321_EFFECTOR_MEMORY_VS_NAIVE_CD8_TCELL_DN	0	0	0	0	0	0	0	0	0	0	0	0	0	0	0
GSE36888_STAT5_AB_KNOCKIN_VS_WT_TCELL_IL2_TREATED_6H_UP	0	0	0	0	0	0	0	0	0	0	0	0	0	0	0
GSE13306_TREG_VS_TCONV_DN	0	0	0	0	0	0	0	0	0	0	0	0	0	0	0
[truncated: 16,038 more rows]
