# Supplementary material for: Brain Region-Specific Gene Signatures Revealed by Distinct Astrocyte Subpopulations Unveil Links to Glioma and Neurodegenerative Diseases
Source: eNeuro. 2019 Apr 2;6(2):ENEURO.0288-18.2019. doi: 10.1523/ENEURO.0288-18.2019 (PMC6449165; doi:10.1523/ENEURO.0288-18.2019)
Supplement: Figure 3-6 — GSVA enrichment scores obtained between the 42 astrocyte subpopulation gene signatures and TCGA GBM or LGG samples. Correlation matrices of -log10 transformed p values are also included. Download Figure 3-6, XLSX file. [file sup_enu-eN-NWR-0288-18-s10.xlsx]

## Sheet: ReadME
Gene-Set Variation Analysis (GSVA) results
Gene expression profiles of glioblastoma (GBM) and lower-grade glioma (LGG) samples were obtained from the ReCount2 database (http://bowtie-bio.sourceforge.net/recount/)
RNA-seq counts were normalized
Clinical data from TCGA GBM dataset was collected from the Broad Institute GDAC Firehose website (version 2016_01_28) and from the GlioVis website.
For TCGA LGG dataset, the genomic data from the supplementary materials of the PanGlioma TCGA paper were collected
Tab	Description
GSVA.GBM.scores	GSVA enrichment scores obtained with GBM samples with tumor purity > 70%
GBM.correlation.matrix	ANOVA and Wilcoxon-Rank Sum tests were performed to evaluate if the GSVA enrichment scores could explain the differences between groups of samples with different genomic features. The matrix shows -log10(p-values)
GSVA.LGG.scores	GSVA enrichment scores obtained with LGG samples with tumor purity > 70%
LGG.correlation.matrix	ANOVA and Wilcoxon-Rank Sum tests were performed to evaluate if the GSVA enrichment scores could explain the differences between groups of LGG samples with different genomic features. The matrix shows -log10(p-values)

## Sheet: GSVA.GBM.scores
	TCGA-02-0047-01A-01	TCGA-02-2483-01A-01	TCGA-02-2485-01A-01	TCGA-02-2486-01A-01	TCGA-06-0125-01A-01	TCGA-06-0129-01A-01	TCGA-06-0157-01A-01	TCGA-06-0158-01A-01	TCGA-06-0174-01A-01	TCGA-06-0187-01A-01	TCGA-06-0211-01B-01	TCGA-06-0221-02A-11	TCGA-06-0238-01A-02	TCGA-06-0646-01A-01	TCGA-06-0686-01A-01	TCGA-06-0743-01A-01	TCGA-06-0744-01A-01	TCGA-06-0745-01A-01	TCGA-06-0747-01A-01	TCGA-06-0750-01A-01	TCGA-06-0878-01A-01	TCGA-06-1804-01A-01	TCGA-06-2557-01A-01	TCGA-06-2558-01A-01	TCGA-06-2559-01A-01	TCGA-06-2562-01A-01	TCGA-06-2563-01A-01	TCGA-06-2564-01A-01	TCGA-06-2565-01A-01	TCGA-06-2567-01A-01	TCGA-06-2569-01A-01	TCGA-06-2570-01A-01	TCGA-06-5408-01A-01	TCGA-06-5413-01A-01	TCGA-06-5414-01A-01	TCGA-06-5415-01A-01	TCGA-06-5416-01A-01	TCGA-06-5418-01A-01	TCGA-06-5856-01A-01	TCGA-06-5858-01A-01	TCGA-06-5859-01A-01	TCGA-08-0386-01A-01	TCGA-12-0616-01A-01	TCGA-12-0618-01A-01	TCGA-12-0619-01A-01	TCGA-12-0821-01A-01	TCGA-12-3650-01A-01	TCGA-12-3652-01A-01	TCGA-12-3653-01A-01
PopA	-0.174616	0.314634	0.232611	-0.194631	-0.24273	-0.399752	-0.15108	-0.27145	0.364692	-0.185675	0.34521	-0.243486	0.257134	-0.339885	-0.158534	-0.242577	0.174202	0.262197	-0.204572	-0.238582	-0.381196	-0.418771	-0.283378	-0.167024	-0.23856	0.142525	0.263877	-0.245058	-0.301941	-0.324479	-0.362164	-0.225264	0.175267	-0.170014	0.210137	0.179818	-0.204992	-0.189671	-0.188677	-0.268897	0.165284	-0.28628	0.242588	0.172991	-0.365766	0.171898	0.361809	0.336947	-0.21564
PopB	-0.215342	-0.167141	-0.254468	0.32667	-0.271313	-0.346124	-0.14562	-0.152979	-0.230533	0.368019	0.184945	-0.445667	-0.277574	-0.183372	-0.206268	-0.142581	-0.223883	0.252197	0.175107	0.275406	-0.19682	-0.402786	0.262977	-0.357503	-0.369894	0.179214	0.150385	-0.150429	-0.332248	-0.160829	-0.34607	-0.264721	-0.177678	-0.218788	0.33209	-0.332689	-0.461788	0.131059	-0.235222	-0.194244	0.158175	-0.290065	-0.251229	-0.404919	0.169408	-0.313714	0.154435	0.217762	0.23297
PopC	-0.234637	-0.18195	-0.163587	0.260782	-0.273482	-0.470571	0.152462	-0.290429	-0.1628	0.348764	0.262956	-0.402195	-0.254489	-0.317992	-0.211597	0.170586	-0.200504	0.302175	0.152091	0.236828	-0.287506	-0.417888	-0.216996	-0.305675	-0.398238	-0.17402	0.200445	-0.252269	-0.347504	-0.249463	-0.346306	-0.372373	-0.146798	-0.200502	0.267741	-0.227708	-0.346579	-0.147887	-0.208513	-0.268244	0.209806	-0.228588	-0.200265	-0.334701	-0.34818	-0.145452	0.250807	0.358894	0.266415
PopD	0.333374	0.332186	0.372573	-0.287547	0.213683	-0.298814	-0.197102	-0.171574	0.423436	-0.200093	0.369268	0.352131	0.181769	-0.182546	-0.202827	-0.351211	-0.274651	-0.247719	-0.192146	-0.391467	-0.314044	-0.277698	-0.251096	0.291973	0.18611	0.201884	0.361375	-0.191424	-0.226907	-0.266544	-0.203465	-0.194997	0.199702	-0.209479	-0.238162	0.248802	-0.181738	-0.29378	-0.244104	-0.228981	0.210204	0.181252	-0.206601	0.247945	-0.396442	0.26212	0.239644	-0.238118	-0.242247
PopE	0.367987	0.248295	0.241279	-0.288337	0.189656	0.191445	-0.186176	0.124718	0.383798	-0.177439	0.292382	0.459872	-0.263141	-0.223475	-0.372945	-0.464468	-0.415643	-0.448411	-0.197073	-0.532534	0.150295	-0.248723	-0.160126	0.32787	0.337662	0.280532	0.262855	0.40253	0.194063	-0.214585	-0.244981	-0.194675	0.227511	-0.203287	0.205235	0.2218	-0.252994	-0.229078	-0.161052	0.338911	0.250782	0.15764	-0.300379	0.315135	-0.299146	0.217911	-0.217924	-0.315314	-0.222841
Brainstem	0.466257	-0.271806	-0.254318	-0.303544	-0.286756	-0.348722	0.200296	0.2712	-0.233632	0.28	-0.224902	-0.243432	-0.289033	0.236204	0.267146	-0.21803	-0.316019	0.210999	-0.373966	0.447156	-0.149843	-0.268366	0.226128	0.278964	-0.22908	0.164449	-0.273975	0.280095	-0.269325	0.347372	-0.300854	-0.250219	-0.492004	-0.281607	-0.350023	-0.177423	-0.315394	-0.564274	-0.199701	0.405456	-0.509673	-0.235744	-0.433624	-0.289826	-0.465399	0.206932	0.200265	-0.254667	-0.308612
Cortex	0.334523	-0.366148	0.341138	-0.633086	-0.418038	-0.588017	0.358774	-0.481333	0.414479	-0.700902	-0.467521	0.363838	0.32916	0.416167	0.330372	-0.296251	-0.522275	-0.351035	0.429125	-0.432901	0.356137	-0.44776	-0.491849	0.570253	-0.242664	0.433354	-0.464723	-0.227999	-0.450132	-0.458455	0.290092	-0.642175	-0.245683	-0.574597	-0.705393	-0.42794	0.298886	-0.72775	-0.479661	0.249847	0.745813	-0.313109	-0.356841	0.356828	-0.396877	0.520018	0.414339	0.341168	-0.433652
Olfactory_bulb	0.369014	-0.275149	0.252595	-0.310862	0.16477	-0.406004	0.244469	-0.225319	0.21148	-0.199632	-0.249913	0.230752	0.196377	0.331882	0.287805	0.17761	-0.201434	0.223997	-0.336826	0.378185	-0.353615	-0.234947	0.288661	0.235962	-0.2067	0.292542	-0.277788	0.16797	-0.274986	-0.327836	-0.221303	-0.206212	-0.222484	0.297974	-0.322234	0.216582	0.180292	-0.170794	-0.331454	-0.195127	-0.298072	-0.26589	-0.181917	0.311484	0.225667	-0.28719	-0.337424	-0.246215	-0.282425
PopA_brainstem	0.193239	-0.298676	0.220585	-0.35164	0.428644	-0.328202	-0.33992	-0.250818	0.275706	0.475469	0.307002	0.315894	-0.539856	0.252401	-0.390608	0.243948	-0.165609	0.180568	0.405769	0.234767	0.31985	-0.311482	-0.265008	-0.397808	-0.315952	-0.190602	0.321088	0.339872	0.238016	-0.288907	-0.296712	-0.348999	0.418587	-0.423217	0.370785	0.211254	-0.276977	-0.230037	-0.344479	0.26087	0.226763	-0.24878	-0.398929	-0.283961	-0.339164	0.394186	-0.209287	0.231346	0.285018
PopA_cortex	-0.481297	0.750544	-0.563165	0.309009	0.401274	-0.32259	-0.371622	-0.333879	0.636103	-0.266441	0.293735	0.455266	0.781542	-0.732046	0.471246	-0.413557	-0.460368	0.357793	0.305761	-0.338459	-0.537104	-0.56679	-0.583229	0.376146	0.488378	0.459997	-0.515987	-0.628863	0.222713	0.25252	0.406048	0.390543	-0.507418	0.709275	-0.365989	-0.288953	-0.374354	0.440121	-0.433369	-0.291872	-0.664642	-0.336608	0.268274	-0.364168	-0.485974	-0.298345	-0.307894	0.434766	-0.375711
PopA_olfactory_bulb	-0.259402	-0.195938	0.171237	0.246889	-0.220251	-0.415589	0.175659	-0.211261	0.22778	0.400542	0.232231	-0.402743	-0.255309	-0.182937	0.160701	0.30045	0.232817	0.309149	0.268924	0.340486	-0.375727	-0.401177	-0.18393	-0.319563	-0.369827	-0.255869	0.181206	-0.235127	-0.346521	-0.266271	-0.396841	-0.307236	0.300778	-0.172548	0.186684	0.205258	-0.286406	-0.24814	-0.3003	-0.345517	-0.225141	-0.203071	0.184246	-0.261216	-0.377177	0.296863	0.380152	0.405843	0.19939
PopB_brainstem	-0.342985	0.177106	-0.230011	0.389877	-0.268646	-0.212816	-0.13863	0.306686	-0.315305	0.31845	0.287133	-0.440803	-0.324235	0.247348	-0.185413	0.29725	0.232944	0.333522	-0.22703	0.29006	-0.240554	-0.323163	0.386276	-0.388577	-0.343048	0.164739	0.252468	-0.21683	-0.344029	0.292644	-0.288043	0.188089	-0.23792	-0.284986	0.272568	-0.301728	-0.531449	-0.210991	-0.299126	-0.215444	-0.185865	-0.258029	-0.269725	-0.407072	0.307421	-0.5135	0.244421	-0.332646	0.24141
PopB_cortex	-0.246223	-0.175919	-0.251528	0.291914	-0.168299	-0.326937	0.148055	0.193729	-0.199699	0.358552	0.221156	-0.427784	-0.330053	0.152761	-0.164397	0.193559	-0.158717	0.273356	0.253678	0.345946	-0.220708	-0.354637	0.239531	-0.334681	-0.348571	0.246407	0.171676	-0.147446	-0.284475	0.172181	-0.281172	-0.236368	0.179559	-0.241977	0.310915	-0.310937	-0.44358	0.176748	-0.231733	-0.226556	-0.214536	-0.259581	-0.24305	-0.389907	0.204288	-0.309657	0.176482	0.209359	0.193261
PopB_olfactory_bulb	-0.187918	-0.22754	-0.282931	0.372542	-0.244554	-0.303983	-0.138265	0.245846	-0.335952	0.398865	-0.211598	-0.475768	-0.331659	0.191859	-0.251872	0.177342	-0.270344	0.252804	-0.186418	0.383766	0.12746	-0.302392	0.271613	-0.352161	-0.332343	0.272053	-0.161613	-0.156239	-0.312242	0.202488	-0.321914	-0.244351	0.158844	-0.24315	0.287579	-0.338693	-0.492864	0.202413	-0.221534	-0.183551	0.186082	-0.293826	-0.277291	-0.404603	0.256722	-0.385172	-0.239989	-0.218555	0.204887
PopC_brainstem	-0.228359	-0.205397	0.201393	0.235805	-0.237591	-0.473602	0.237199	-0.234741	0.225583	0.377521	0.3296	-0.37244	-0.292526	-0.265608	-0.197442	0.175689	-0.249669	0.251494	0.219468	0.257955	-0.310265	-0.379975	-0.218819	-0.359258	-0.403855	-0.199305	0.17865	-0.251443	-0.352388	-0.258021	-0.318264	-0.377215	0.232512	-0.223512	0.277067	-0.291281	-0.412238	-0.219157	-0.212149	-0.316013	0.262434	-0.175306	-0.180307	-0.236911	-0.299383	0.164598	0.27677	0.32269	0.277913
PopC_cortex	0.173105	-0.295622	-0.170544	0.236167	-0.263489	-0.500187	0.203163	-0.225676	-0.206142	0.339474	0.232293	-0.361616	-0.259447	-0.28593	-0.266565	0.195326	-0.205885	0.254255	0.156708	0.185581	-0.257509	-0.390874	-0.226584	-0.304146	-0.421367	0.15625	0.179995	-0.217555	-0.340174	0.179499	-0.341398	-0.407267	-0.160249	-0.209848	0.229934	0.15461	-0.371081	-0.204775	-0.207499	-0.289584	0.265967	-0.159389	-0.207404	-0.289365	-0.373942	-0.158554	0.228795	0.331038	-0.190812
PopC_olfactory_bulb	0.222332	-0.401569	0.281319	-0.237523	-0.180029	-0.429	0.328307	0.215811	-0.167671	0.385105	0.288463	-0.25047	-0.356084	-0.290796	-0.390353	0.16208	-0.353221	-0.216732	-0.197524	-0.26954	-0.141178	-0.238807	-0.161503	-0.227606	-0.251196	0.218473	0.245888	0.335153	-0.22925	0.165682	-0.456976	-0.337818	0.19115	-0.217775	0.324107	0.293684	-0.448307	-0.216834	0.229961	-0.199656	0.331726	0.216309	-0.398502	-0.217179	-0.380546	-0.172456	-0.15415	0.212684	0.250145
PopD_brainstem	0.286147	0.16888	0.207964	-0.346602	0.23118	-0.275044	0.234339	0.210496	0.26773	0.24417	0.260056	0.305513	-0.247309	0.224012	0.223349	0.176868	0.126007	0.210974	0.223988	0.159401	-0.337895	-0.277776	0.294596	-0.194856	-0.183077	0.159756	0.240429	0.211438	-0.289797	-0.256504	-0.270936	0.20106	0.231277	-0.260671	-0.246115	-0.198896	-0.384091	-0.212692	-0.277838	-0.260735	-0.26713	0.219146	-0.253577	0.321015	-0.214188	0.180976	0.184603	-0.25004	-0.230891
PopD_cortex	-0.57792	-0.464863	-0.648499	0.622523	0.402034	0.273857	0.367663	-0.27172	-0.48607	-0.419642	0.463878	-0.570467	-0.61291	-0.654891	-0.613374	0.53536	-0.333611	0.318253	0.723758	0.459727	0.584178	0.504303	-0.487508	-0.685609	-0.566296	-0.485905	-0.475159	-0.666566	0.328484	-0.336475	-0.306739	-0.772392	0.415059	-0.489466	-0.329945	-0.496101	-0.287515	-0.344493	0.335273	-0.285758	0.626426	0.279611	-0.48595	-0.693343	-0.312479	0.446467	-0.498044	0.356098	0.495473
PopD_olfactory_bulb	-0.255284	-0.398811	0.204067	0.368406	0.247669	-0.340925	0.232475	-0.242472	-0.355196	0.445784	0.347261	-0.292934	-0.437395	0.19853	-0.441835	0.195532	0.165567	0.31597	-0.281381	-0.203352	0.238448	0.262324	0.257303	-0.284978	-0.275111	0.358663	0.320538	0.451855	-0.315532	0.328619	0.342412	-0.311062	0.300342	0.230587	0.30201	-0.275484	-0.426877	-0.208197	0.272465	0.195652	-0.270889	0.333757	-0.408672	-0.441189	-0.227798	-0.255529	-0.294068	-0.350638	-0.257635
PopE_cortex	-0.249107	0.21993	0.325695	-0.196425	-0.26766	-0.36936	0.308569	0.200609	-0.183747	-0.214543	0.317777	0.164306	-0.252024	-0.175904	-0.186286	0.164876	0.211693	0.250896	-0.284039	0.201648	-0.172238	-0.229324	-0.198758	0.234447	-0.297606	-0.243033	0.30688	-0.292235	-0.27812	0.349578	0.365016	-0.229948	-0.228374	-0.21063	-0.326824	0.299036	-0.395233	-0.335528	-0.314725	-0.205244	0.279018	0.28438	0.292718	-0.27263	-0.280873	0.247229	0.243918	0.230919	0.321738
PopE_olfactory_bulb	-0.363115	-0.224558	-0.225029	0.410981	-0.23144	-0.320877	-0.144346	0.203011	-0.209732	0.203498	-0.214965	-0.365479	-0.237789	0.145904	-0.292967	0.204199	0.175672	0.234186	-0.211209	0.264794	-0.279865	-0.344756	0.235533	-0.254244	-0.276746	0.198859	0.220895	-0.160101	-0.24166	0.237407	-0.233531	-0.499177	0.289868	0.291743	0.238297	-0.286154	-0.272738	-0.22908	-0.327079	-0.245601	0.27726	-0.174944	0.145894	-0.252244	0.164574	-0.172003	-0.234631	0.288882	-0.235819
AMYGDALA_UP_AS1	0.644474	-0.585523	0.426781	-0.53186	0.406268	-0.267157	-0.400686	0.705374	0.291946	-0.504964	0.356029	0.257203	0.403875	-0.227238	0.319542	0.517681	-0.401316	-0.510205	-0.431686	-0.317776	0.29154	0.393756	-0.378979	0.36435	-0.45478	-0.315074	0.217512	0.494414	-0.446791	-0.469523	-0.600521	0.454624	-0.212883	0.286092	0.432188	0.791071	-0.749382	-0.595234	0.372966	-0.306569	0.49297	0.270894	-0.488521	0.408691	-0.802303	-0.478815	0.272955	0.421995	-0.269859
AMYGDALA_UP_AS2	0.484443	-0.596875	0.42021	-0.624107	0.665567	-0.375892	0.506864	0.736145	-0.313268	-0.344092	0.36812	-0.367095	-0.23526	-0.253837	-0.284717	0.645682	0.330508	0.366959	0.375197	0.434608	-0.489517	-0.342418	-0.452476	-0.430458	-0.574436	0.256257	0.271478	0.335855	-0.351108	-0.365436	-0.505817	0.394039	0.297497	0.229184	-0.458243	0.801826	-0.561679	-0.496424	0.442728	-0.468621	0.348584	0.429076	-0.394714	-0.47762	-0.647813	-0.515547	-0.316571	0.419105	-0.228637
AMYGDALA_UP_AS3	0.436881	-0.680714	-0.316013	-0.390089	0.503481	-0.487448	0.581411	0.674538	-0.344388	0.306336	0.225131	-0.416236	-0.269213	-0.230637	-0.25625	0.549106	-0.464662	-0.295799	0.260292	0.32943	-0.468377	-0.483244	-0.226142	-0.550591	-0.624768	0.30025	0.307938	-0.219096	-0.520207	0.443072	-0.493636	-0.272684	-0.235398	0.215103	-0.578086	0.752244	-0.455335	-0.53983	-0.236455	-0.612505	0.377464	0.53749	-0.467453	-0.605694	-0.325611	-0.268048	-0.420594	0.339466	-0.296544
AMYGDALA_TOP50	0.469565	-0.595371	0.40642	-0.507871	0.455869	-0.501867	0.48366	0.452782	-0.249191	0.420211	0.432449	0.15693	-0.505106	-0.305347	-0.364817	0.497547	-0.206807	-0.275936	0.349344	-0.240977	0.157926	0.303274	0.174263	0.202446	-0.367802	0.27578	0.290929	0.446516	0.288634	0.239601	-0.603954	-0.359616	0.201485	-0.183024	0.309118	0.511305	-0.646132	-0.207316	0.144356	-0.252089	0.267125	0.237588	-0.576296	-0.35578	-0.585955	-0.282736	-0.133907	0.285962	0.400592
HEMISECTION_1WEEK_UP	0.362438	-0.222984	0.383075	0.483339	-0.442586	0.225445	0.238358	0.270583	-0.347372	0.497956	-0.433868	-0.332134	0.349116	0.288732	0.158391	-0.236252	-0.35397	-0.219935	-0.247061	0.262581	-0.241197	-0.440008	0.408308	-0.237055	0.21122	-0.358622	0.339673	-0.260851	-0.307014	0.23019	-0.456016	-0.215502	0.229348	0.224643	0.244118	-0.281159	-0.35655	-0.374553	-0.413063	0.217394	0.257757	-0.388388	0.189285	-0.278778	0.185262	-0.270415	-0.35442	-0.262174	0.297608
HEMISECTION_2WEEK_UP	0.243113	0.183912	-0.236335	0.511654	-0.377229	-0.325474	-0.208094	0.219271	-0.314261	0.250144	-0.293643	-0.35772	0.178369	0.233531	0.157662	-0.295221	-0.309611	0.239924	-0.327389	0.329692	0.174967	-0.485337	0.364421	-0.154161	0.215449	0.282141	-0.226686	0.255389	-0.311866	0.211488	-0.444685	-0.169535	-0.316095	0.259258	0.285482	-0.355997	-0.462883	-0.21175	-0.38094	0.261995	-0.282263	-0.402899	-0.291233	-0.301463	-0.147871	-0.310368	-0.259608	-0.356387	-0.311084
TRANSECTION_1WEEK_UP	-0.17858	-0.332813	0.243695	0.638731	-0.490068	0.161706	-0.191812	0.256226	-0.521886	0.360441	-0.420922	-0.493043	0.186775	0.299676	-0.422217	-0.158153	-0.344614	-0.306563	-0.257516	0.426706	0.156861	-0.282177	0.442477	-0.412181	-0.301954	-0.272865	0.307797	-0.237693	-0.23667	0.446426	-0.525763	-0.367595	0.311007	0.233793	0.435685	-0.374155	-0.555049	-0.246337	-0.372959	-0.16989	0.286568	-0.422358	-0.187417	-0.55618	0.224976	-0.376853	-0.42668	-0.163387	0.416145
TRANSECTION_2WEEK_UP	0.304145	-0.272007	-0.271287	0.428662	-0.388404	-0.355328	-0.204707	0.171818	-0.310213	0.236674	-0.304609	-0.322288	0.155822	0.186743	-0.150615	-0.201061	-0.320542	0.194132	-0.312813	0.329243	-0.251615	-0.397774	0.309793	-0.185319	-0.1849	0.282081	-0.311958	0.137214	-0.337873	-0.217866	-0.408918	-0.263403	-0.273859	0.231485	-0.224748	-0.222424	-0.376999	-0.240575	-0.262912	0.234146	-0.221385	0.203978	-0.281611	-0.319655	-0.188015	-0.187489	-0.293267	-0.271997	-0.424075
STRIATUM_TOP50	0.321661	-0.68242	0.494496	-0.5595	0.316551	-0.610888	0.583423	0.457395	-0.34019	0.549975	0.39042	-0.1929	-0.495179	-0.406533	-0.450097	0.461784	-0.391009	-0.317664	0.216264	-0.428766	-0.233186	0.342068	0.164773	-0.264497	-0.422721	-0.244567	0.257316	0.549866	-0.293628	0.280918	-0.739473	-0.423035	0.243191	-0.267586	0.342536	0.596347	-0.652746	-0.185058	0.258622	-0.298287	0.30713	0.336349	-0.548644	-0.465932	-0.673436	0.206334	-0.177253	0.254511	0.346196
HIPPOCAMPUS_ASTRO1	0.687976	-0.911215	0.459437	0.226635	-0.300793	-0.70144	0.696163	0.626239	-0.641025	0.575462	-0.402241	-0.661019	-0.633791	-0.45418	-0.807479	0.558305	-0.800087	-0.507558	0.659078	-0.267322	-0.540624	-0.404195	-0.317983	-0.605903	-0.8136	-0.665314	-0.721834	0.617793	-0.431974	0.644555	-0.62581	-0.69383	-0.41702	0.614917	0.47185	0.549597	-0.799788	-0.370898	-0.415007	0.497862	0.519951	0.37947	-0.663029	-0.798475	-0.395627	0.431647	-0.614996	-0.622931	-0.510196
HIPPOCAMPUS_ASTRO2	-0.274924	-0.711006	0.716879	-0.277646	0.533254	-0.813813	0.837633	0.683069	-0.25327	0.528742	0.572192	-0.588928	-0.55743	-0.495674	-0.645208	0.712057	-0.665657	0.310602	0.398711	-0.483592	0.346433	0.419014	-0.559277	-0.679058	-0.625432	-0.548446	-0.348816	-0.563855	0.586695	-0.359307	-0.841271	-0.480872	0.350782	0.559745	0.373866	-0.419499	-0.899153	-0.518553	0.528416	-0.578187	0.481082	0.382647	-0.533967	-0.717771	-0.799457	0.622561	-0.40689	0.499461	0.271464
HIPPOCAMPUS_TOP240	0.224468	-0.406846	0.251576	-0.257426	0.254438	-0.378069	0.408501	0.226578	-0.254291	0.389368	0.243248	-0.241905	-0.448849	-0.239275	-0.351203	0.282619	-0.246513	-0.227243	0.223886	-0.202713	-0.190142	-0.196289	0.237352	-0.333769	-0.325869	0.217503	0.281391	0.344929	0.186333	0.259279	-0.380272	-0.344682	0.213875	-0.249607	0.269735	0.279696	-0.483806	-0.195626	-0.157721	-0.217444	0.248463	0.291474	-0.418695	-0.278086	-0.384616	-0.224504	-0.244342	0.200745	0.24894
CORTEX_DEVELOPMENT_A1	0.548232	-0.234057	0.370676	-0.637754	0.525022	-0.291589	0.430856	0.548223	0.616381	-0.306169	0.478306	0.540118	-0.235717	0.325533	0.239744	0.187093	-0.344163	-0.238549	-0.288748	-0.307787	-0.476703	-0.221569	0.40856	0.470004	0.321592	-0.222273	0.322576	0.237394	0.508167	-0.641792	-0.757648	0.405751	0.391865	-0.196395	-0.276435	0.592217	-0.168995	-0.365345	0.410171	-0.192706	-0.442213	-0.365089	-0.406627	-0.300818	-0.736984	-0.42191	0.393798	-0.214697	-0.34505
CORTEX_DEVELOPMENT_A2	0.605152	-0.647419	-0.322135	-0.360438	0.34216	-0.376721	-0.34349	0.550138	0.500544	0.543981	0.4649	0.908068	-0.449445	0.54618	-0.434786	-0.369525	-0.520937	-0.472833	-0.613158	-0.468913	-0.363812	-0.425355	0.407651	-0.390564	0.70757	0.320888	0.46324	0.526794	0.471012	-0.743369	-0.89347	0.51668	0.413491	-0.595195	0.516655	-0.315603	-0.362209	0.36746	0.355139	-0.362891	-0.36589	-0.408846	-0.702866	-0.357729	-0.713677	-0.403328	-0.325017	0.322615	-0.547229
CORTEX_DEVELOPMENT_A3	0.677271	-0.465799	0.635389	-0.380736	0.394706	-0.544323	0.504558	0.573633	0.40524	0.447586	0.331918	0.671406	-0.443306	0.453608	-0.48889	0.3113	-0.642358	-0.428199	-0.275756	-0.648523	-0.229097	-0.306856	-0.209675	0.420075	0.424211	-0.404548	0.440824	0.609764	0.479897	-0.451111	-0.882394	0.29542	-0.319299	-0.396399	0.445188	0.474825	-0.543127	-0.417079	0.295403	-0.22943	-0.449626	-0.409032	-0.71601	-0.228823	-0.774262	-0.212966	0.422045	-0.375721	-0.272597
CORTEX_INJURY_MCAO_B1	0.681301	-0.5042	0.619312	-0.412268	0.468779	-0.621366	0.475701	0.62113	0.441506	0.534408	0.367579	0.625988	-0.517994	0.525554	-0.585195	0.409021	-0.718462	-0.476996	0.308734	-0.603901	-0.229093	-0.331324	-0.388849	0.348338	0.424675	-0.443918	0.346294	0.56749	0.515864	-0.498978	-0.893501	0.358668	0.426875	-0.295025	0.504842	0.517772	-0.478571	-0.306436	0.313696	-0.303552	-0.381871	-0.439367	-0.691227	-0.314682	-0.740774	-0.294493	0.465105	0.381484	0.302179
CORTEX_INJURY_MCAO_B2	0.575985	-0.323665	0.288668	-0.411018	0.326564	-0.296326	0.344318	0.538068	0.495054	-0.338537	0.338815	0.407548	-0.249474	0.267279	-0.258393	-0.146827	-0.47009	-0.244938	-0.31683	-0.286492	-0.332797	-0.271201	0.219494	0.423778	0.328036	-0.270239	0.25377	0.352375	0.217309	-0.485326	-0.685318	0.290591	0.2148	-0.255111	-0.273903	0.477414	-0.357214	-0.416492	0.356219	0.196066	-0.338316	-0.356377	-0.442956	0.223115	-0.681656	-0.211517	0.266979	-0.344076	-0.301922
CORTEX_INJURY_MCAO_B3	0.592043	-0.334746	0.394079	-0.406724	0.27028	-0.342837	0.334659	0.413893	0.485158	-0.269055	0.295216	0.502763	-0.191629	0.388393	0.228737	-0.223606	-0.503134	-0.308274	-0.269295	-0.301698	-0.34816	0.219631	0.174219	0.397896	0.377803	-0.233941	-0.257447	0.39518	-0.346959	-0.321287	-0.660832	0.222453	0.30231	-0.214043	-0.283851	0.404159	-0.422296	-0.318321	0.247486	-0.219726	-0.297061	-0.232752	-0.41075	0.224578	-0.561116	-0.182985	0.251135	-0.389375	-0.406196
CONTUSION_SCI_RA	0.684949	-0.380668	-0.417108	-0.400676	0.393164	-0.626808	0.467083	0.631843	0.53311	0.519681	0.386826	-0.684223	-0.531345	0.509557	0.2929	0.37892	-0.510099	0.280115	0.408317	0.31515	0.38345	-0.566187	-0.204172	-0.353557	0.382243	0.309629	-0.392111	-0.343292	0.262534	-0.379938	-0.174209	-0.372936	0.422838	0.210892	0.467743	0.228663	-0.440565	-0.39962	0.292734	0.356374	-0.415812	-0.475946	-0.18698	-0.5518	0.309825	0.495665	-0.314725	-0.185175	-0.439089
CONTUSION_SCI_SA	0.464649	0.615819	0.573953	-0.682573	0.481039	-0.475983	0.503989	0.528466	0.810264	0.425533	0.481967	0.526315	-0.334068	0.333754	0.29092	-0.47763	-0.410243	0.227426	0.274441	-0.532847	-0.245098	-0.461724	0.405378	-0.232363	-0.199265	0.320953	-0.317132	0.329391	0.397211	-0.357083	-0.616337	0.245499	0.440446	0.216886	-0.384288	0.540538	0.366543	-0.480208	-0.38468	0.562647	-0.428661	0.343586	0.562936	0.224683	-0.625674	0.256436	0.394891	-0.333469	-0.416019
[truncated: 54 more columns]

## Sheet: GBM.correlation.matrix
	Classical	Mesenchymal	Proneural	TP53_mut	EGFR_mut	PTEN_mut	NF1_mut	PIK3R1_mut	PIK3CA_mut	RB1_mut	ATRX_mut	IDH1_mut	APOB_mut	PDGFRA_mut	EGFR_amp	PDGFRA_amp	CDK4_amp	CDKN2A_del	MTAP_del	PTEN_del	QKI_del	RB1_del
PopA	0	0	0	0	0	0	0	0	0	0	0	0	0	0	2.32782	0	0	2.03511	1.79874	0	0	0
PopB	0	0	-4.52751	-3.92741	0	0	0	0	0	0	0	0	0	-1.31248	2.937	0	-2.25808	3.28984	2.55566	0	0	0
PopC	0	0	-4.73364	-3.43853	0	0	0	0	0	0	0	0	0	-1.31248	3.27436	0	-1.4215	4.82694	4.01969	0	0	0
PopD	0	0	0	0	0	-1.32313	0	0	0	0	0	0	0	0	0	0	0	0	0	0	0	0
PopE	0	0	0	0	0	0	0	0	0	0	0	0	0	1.7763	0	0	0	0	0	0	0	0
Brainstem	-1.80813	0	0	0	0	0	0	0	0	1.85695	0	0	0	0	0	0	0	0	0	1.69693	0	0
Cortex	-2.96903	0	2.1175	0	0	0	0	0	0	0	0	0	0	0	0	0	0	0	0	0	0	0
Olfactory_bulb	-2.35537	0	0	0	0	0	0	0	0	0	0	0	0	0	0	0	0	0	0	0	0	0
PopA_brainstem	3.04632	-2.64506	-3.80488	-1.9489	0	0	0	0	0	0	0	0	0	0	4.69152	0	-2.09452	3.12437	2.2607	0	1.30106	-1.4056
PopA_cortex	-2.93813	0	1.89047	0	0	0	1.7963	0	0	0	1.47152	1.65868	0	0	0	0	0	0	0	0	0	0
PopA_olfactory_bulb	1.55772	-2.69192	-3.06761	-4.24268	0	0	0	0	0	0	0	0	0	0	5.95404	0	-1.3091	5.7992	4.2203	1.48126	0	0
PopB_brainstem	0	0	-2.08526	0	0	0	0	0	0	0	0	0	0	-2.02364	1.59038	0	0	0	0	0	0	0
PopB_cortex	0	0	-4.64575	-3.47799	0	0	0	0	0	0	0	0	0	-1.39974	3.5953	0	-2.22487	2.8896	2.40113	0	0	0
PopB_olfactory_bulb	0	0	-2.92393	-2.64014	0	0	0	0	0	0	0	0	0	-1.56371	1.31597	0	-2.37059	2.24139	1.54538	0	0	0
PopC_brainstem	0	-1.75674	-3.82884	-3.61121	0	0	0	0	0	0	0	0	0	0	3.41002	0	0	4.4664	3.92127	0	0	0
PopC_cortex	0	-1.32234	-5.56373	-3.36029	0	0	0	0	0	0	0	0	-1.45556	-1.38207	2.91588	0	-1.98893	5.23031	4.34824	0	0	0
PopC_olfactory_bulb	4.80549	-3.99119	-10.3665	-2.67461	0	0	0	0	0	0	-1.48973	-1.54505	-1.90002	0	4.04315	0	0	2.01765	2.14246	0	0	0
PopD_brainstem	0	-2.51477	0	0	0	0	0	0	0	0	0	0	0	0	1.3089	0	0	0	0	0	0	0
PopD_cortex	0	0	-5.44946	0	0	0	0	0	-1.51315	0	0	0	0	-1.65868	0	0	-1.87595	0	0	0	0	0
PopD_olfactory_bulb	1.72613	0	-6.22641	0	0	0	0	0	0	0	0	-1.9394	0	-1.678	0	0	-2.49755	0	0	0	0	0
PopE_cortex	0	-2.40829	-1.70314	0	0	0	0	0	0	0	0	0	0	-1.41752	1.88198	0	0	0	0	0	0	0
PopE_olfactory_bulb	0	0	-3.01289	-1.53201	0	0	0	0	0	0	-1.50806	-2.06644	0	-1.69744	1.42415	0	-2.73706	2.21392	1.35351	0	0	0
AMYGDALA_UP_AS1	2.11404	-1.90407	-2.59084	-1.41244	1.34896	0	0	0	0	0	0	0	0	0	0	0	0	0	0	0	0	0
AMYGDALA_UP_AS2	2.3047	-1.37578	-4.35878	0	2.86741	0	0	0	0	0	0	0	0	0	2.70897	0	0	1.53638	0	0	1.30106	0
AMYGDALA_UP_AS3	0	0	-4.65257	0	2.64341	0	0	0	0	0	0	0	0	0	1.56718	0	0	1.41706	0	0	0	0
AMYGDALA_TOP50	9.45255	-7.75402	-12.2418	-3.14366	2.84339	0	0	0	0	0	-1.54505	0	-1.45556	0	5.93882	0	0	2.10572	2.16946	0	0	0
HEMISECTION_1WEEK_UP	0	0	0	0	0	0	-1.73665	0	0	0	0	0	0	0	0	0	0	0	0	0	0	0
HEMISECTION_2WEEK_UP	-2.94444	0	0	-1.61141	0	0	0	0	0	0	0	0	0	0	0	0	0	0	0	0	0	0
TRANSECTION_1WEEK_UP	0	0	-3.72637	-1.48876	0	0	0	0	0	0	0	0	0	0	0	0	-1.61265	0	0	0	0	1.42698
TRANSECTION_2WEEK_UP	-3.522	0	0	-1.63831	0	0	0	0	0	0	0	0	0	0	0	0	0	0	0	0	0	0
STRIATUM_TOP50	9.288	-8.69364	-12.9432	-2.80298	2.04719	0	-1.71699	0	0	0	-1.9394	-1.54505	0	0	5.00651	0	0	1.56695	1.40394	0	0	0
HIPPOCAMPUS_ASTRO1	1.44369	0	-6.9966	-3.87143	2.26572	0	0	0	0	0	0	-1.5265	0	0	2.96882	0	-1.81573	2.09683	1.44052	0	0	0
HIPPOCAMPUS_ASTRO2	2.43847	-3.04628	-8.83944	-3.51768	4.88708	0	-1.45341	0	0	0	0	0	0	0	5.28903	0	0	2.11463	1.77418	0	0	0
HIPPOCAMPUS_TOP240	7.41916	-7.18894	-12.7326	-2.6631	2.25506	0	0	0	0	0	-1.7763	-1.43541	-1.40979	0	4.46549	0	-1.61265	2.09683	2.01872	0	0	0
CORTEX_DEVELOPMENT_A1	0	-2.48456	0	0	0	0	0	0	0	0	0	0	-1.34246	2.33273	0	0	0	0	1.42583	0	0	0
CORTEX_DEVELOPMENT_A2	0	0	0	0	0	0	-1.678	0	0	0	0	0	-1.92644	1.43541	0	0	0	0	0	0	0	0
CORTEX_DEVELOPMENT_A3	0	-1.98996	-1.43602	-1.64733	1.32434	0	-1.65868	0	0	0	0	0	0	0	2.99014	0	0	0	0	1.32897	0	0
CORTEX_INJURY_MCAO_B1	0	-2.95046	-2.43951	-2.13998	1.44114	0	-1.56371	0	0	0	0	0	0	0	3.70175	0	0	1.77293	0	0	0	0
CORTEX_INJURY_MCAO_B2	0	-1.51547	0	0	0	0	-1.678	0	0	0	0	0	0	1.56371	0	0	0	0	0	0	0	0
CORTEX_INJURY_MCAO_B3	0	0	0	0	0	0	-1.73665	0	0	0	0	0	-1.36473	1.63946	1.31597	0	0	0	0	0	0	0
CONTUSION_SCI_RA	0	0	-1.54703	-3.1562	0	0	0	0	0	0	0	0	0	0	3.07618	0	0	2.9845	1.87345	0	0	0
CONTUSION_SCI_SA	0	-1.9251	0	0	0	0	0	0	0	0	0	0	0	1.5265	1.44629	0	0	1.72427	1.84006	0	0	0

## Sheet: GSVA.LGG.scores
	TCGA-CS-4938	TCGA-CS-4942	TCGA-CS-4943	TCGA-CS-4944	TCGA-CS-5390	TCGA-CS-5394	TCGA-CS-5395	TCGA-CS-5396	TCGA-CS-6186	TCGA-CS-6668	TCGA-DB-5273	TCGA-DB-5274	TCGA-DB-5275	TCGA-DB-5277	TCGA-DB-5278	TCGA-DB-5279	TCGA-DB-5280	TCGA-DB-A4XA	TCGA-DB-A4XB	TCGA-DB-A4XC	TCGA-DB-A4XG	TCGA-DB-A64O	TCGA-DB-A64P	TCGA-DB-A64Q	TCGA-DB-A64R	TCGA-DB-A64S	TCGA-DB-A64U	TCGA-DB-A64V	TCGA-DB-A64W	TCGA-DH-5140	TCGA-DH-5141	TCGA-DH-5142	TCGA-DH-5144	TCGA-DH-A66B	TCGA-DU-5847	TCGA-DU-5849	TCGA-DU-5852	TCGA-DU-5853	TCGA-DU-5870	TCGA-DU-5871	TCGA-DU-5872	TCGA-DU-5874	TCGA-DU-6392	TCGA-DU-6393	TCGA-DU-6394	TCGA-DU-6395	TCGA-DU-6397	TCGA-DU-6399	TCGA-DU-6400
PopA	0.3724	0.252045	0.219731	0.42684	-0.179753	-0.1935	0.228781	0.243302	-0.230359	-0.234657	0.291922	0.283287	-0.28239	-0.216686	0.32209	0.302119	-0.287845	0.26658	-0.323195	-0.325476	0.210761	0.203974	0.160379	-0.235387	-0.277141	-0.240862	-0.284567	0.19426	-0.182621	0.200651	0.338144	-0.227384	0.222343	0.184283	-0.336111	0.260967	0.173064	-0.217036	-0.155682	0.164519	0.220407	-0.226641	-0.174217	-0.265855	0.185414	0.249972	0.147114	0.21348	-0.181408
PopB	0.329876	0.282487	-0.15519	0.392625	-0.388205	-0.366692	0.169388	0.192293	0.267364	-0.420735	0.34737	0.27092	-0.275995	-0.273021	-0.164445	-0.196774	-0.224741	0.289304	-0.303663	-0.267469	-0.423976	0.268553	0.145866	-0.32556	-0.462516	0.318797	-0.252265	0.346357	-0.488927	-0.242795	0.29679	0.308813	-0.250677	0.289201	0.228028	-0.209791	0.324963	-0.196364	-0.174576	0.228183	0.296458	-0.392312	0.203622	-0.409862	-0.267755	0.336977	-0.144806	0.266969	-0.371486
PopC	0.41177	0.268394	-0.193614	0.488204	-0.326525	-0.202962	0.251788	0.229098	0.31801	-0.353553	0.366545	0.307394	-0.264701	-0.26388	0.264774	0.246564	-0.222298	0.314632	-0.374629	-0.348169	-0.265639	0.314871	0.199637	-0.202007	-0.358196	0.175486	-0.27755	0.290951	-0.37102	-0.261804	0.430737	0.204055	0.174453	0.190117	-0.216093	0.159436	0.231178	-0.298059	0.190602	0.175032	0.252402	-0.342416	-0.21404	-0.34067	-0.213872	0.328452	0.247307	0.191283	-0.297368
PopD	0.264938	0.286833	0.292669	0.28191	0.307684	0.290763	0.338361	0.328788	-0.24227	0.27907	0.25536	0.233956	-0.208344	0.181372	0.401013	0.388289	-0.236402	0.173711	0.243863	-0.207173	0.333396	-0.204331	0.228686	0.194796	0.164086	-0.317539	-0.204556	-0.230052	0.351768	0.281694	0.279786	-0.254518	0.323324	-0.24516	-0.329102	0.347759	-0.20407	0.28054	0.221295	0.239338	-0.201591	0.212971	0.184168	-0.220806	0.230187	0.211589	0.239606	0.29676	0.219176
PopE	0.300601	0.259732	0.278093	-0.171225	0.342143	0.431397	0.386576	0.357541	-0.289315	0.396122	-0.18718	-0.308844	-0.308035	0.198322	0.402733	0.399578	0.23395	-0.298167	0.26907	0.176696	0.411789	-0.192297	0.149165	0.290116	0.233696	-0.278897	0.217279	-0.385671	0.35826	0.233962	-0.17017	-0.291502	0.340041	-0.225442	-0.302529	0.265628	-0.274657	0.352912	0.219758	0.14545	-0.144284	0.224248	-0.241878	0.186647	0.350311	-0.342929	-0.157169	0.315094	-0.206163
Brainstem	-0.350099	0.216684	-0.487187	0.371954	-0.284213	-0.409649	0.255958	-0.194876	-0.388837	-0.504603	0.231133	0.376555	-0.438161	0.253612	0.183566	0.288015	-0.351857	0.451972	-0.356554	-0.296733	-0.472972	0.311873	0.309421	-0.395673	-0.387082	0.258897	0.311032	0.406274	-0.193478	-0.360784	0.385048	-0.401061	-0.544069	-0.419354	0.28717	0.436572	0.350061	-0.347503	-0.213674	-0.351372	0.238462	-0.464396	0.261744	-0.420532	-0.418248	-0.311572	0.256721	-0.286621	-0.414406
Cortex	-0.353347	0.619032	-0.454925	0.331811	0.235155	-0.59535	0.299425	-0.363857	0.364817	-0.456478	-0.461283	-0.352601	0.479251	0.256031	0.318016	0.484871	-0.414402	-0.322133	-0.295192	0.376895	-0.309956	0.496011	-0.498168	-0.231513	-0.487899	-0.380608	-0.706422	0.313928	-0.343533	0.59786	-0.484719	0.271248	-0.393758	-0.427256	0.427524	0.781732	0.283697	-0.34915	0.334012	0.263418	-0.269705	-0.379618	-0.355104	0.305361	-0.300286	0.399601	0.450355	0.407617	0.294121
Olfactory_bulb	-0.328578	0.239505	0.219761	-0.221531	-0.36234	-0.377483	0.274377	-0.277622	-0.418133	-0.487682	0.352682	0.164311	-0.269881	0.255326	0.399581	-0.321201	-0.256474	0.375509	0.260406	0.358283	-0.34973	0.214904	-0.270869	-0.394168	-0.261053	-0.15417	-0.314999	-0.207511	-0.322397	0.481985	-0.214507	-0.245948	-0.255378	-0.34984	0.182238	-0.260993	0.296378	0.253532	0.197983	-0.299832	-0.221077	-0.432071	0.350616	-0.441035	-0.363985	0.194682	0.201898	-0.227814	-0.422408
PopA_brainstem	0.337743	-0.244679	-0.213663	-0.211764	-0.378516	0.296954	0.2725	0.262188	0.320687	-0.384686	0.310066	-0.440277	0.238232	0.355787	0.285517	0.29285	-0.26907	-0.224294	0.255718	0.185245	-0.342057	-0.251218	-0.348453	-0.417857	-0.372472	-0.263902	-0.463427	-0.317098	-0.210693	0.275632	-0.222688	0.318841	-0.286818	0.251042	0.345422	0.28372	-0.248783	-0.28394	-0.328903	0.232096	-0.210482	-0.336828	0.264053	-0.323653	-0.22734	0.272898	-0.299098	0.159228	-0.287941
PopA_cortex	0.316302	-0.385368	0.532118	-0.722008	-0.208407	0.429415	0.337731	0.374477	-0.323136	-0.302532	-0.417909	-0.23694	-0.340947	0.373543	0.577846	0.409644	-0.414478	-0.511458	-0.450735	0.535706	0.726625	-0.775418	0.695043	0.661641	0.648603	-0.350363	0.37654	0.289693	0.695507	-0.379209	0.539685	-0.451323	0.649311	-0.486006	-0.581114	0.369651	-0.52669	-0.340524	-0.494884	-0.341355	-0.397175	0.40656	0.321414	0.295555	-0.492208	-0.399445	-0.419509	0.390332	-0.276716
PopA_olfactory_bulb	0.326968	0.291057	-0.212746	0.436736	-0.393151	-0.326721	0.234748	0.220248	0.34242	-0.420136	0.457537	0.317017	-0.208804	-0.372954	-0.172192	-0.275844	-0.223848	0.314382	-0.30554	-0.320134	-0.33297	0.302086	-0.214531	-0.376182	-0.364296	0.249581	-0.255741	0.364346	-0.377093	0.248659	0.400992	0.31738	-0.275762	0.221484	-0.188642	-0.305878	0.257118	-0.324194	-0.241627	-0.200823	0.246689	-0.37492	0.283561	-0.365528	-0.328962	0.423491	-0.182596	0.237394	-0.355892
PopB_brainstem	-0.198624	0.252577	0.244137	0.317779	-0.354119	-0.426192	-0.373184	-0.245669	0.332313	-0.402644	0.262578	0.306971	-0.270366	-0.286968	-0.246373	-0.328385	-0.334472	0.299758	-0.22135	0.193138	-0.390972	0.231456	0.216483	-0.34297	-0.353577	0.345247	-0.158156	0.372013	-0.39529	-0.277868	-0.220732	0.311105	-0.282644	0.325895	0.269014	-0.250402	0.319677	0.195108	-0.239267	-0.208641	0.165498	-0.281981	0.219193	-0.378434	-0.269121	0.264415	-0.206019	-0.19444	-0.269063
PopB_cortex	0.198985	0.217534	-0.193373	0.309823	-0.383662	-0.348045	-0.21196	0.178269	0.277112	-0.386809	0.307327	0.266008	-0.248941	-0.279919	-0.16856	-0.263415	-0.264371	0.328597	-0.269329	-0.204585	-0.368838	0.241142	0.199981	-0.31484	-0.3775	0.324896	-0.190302	0.342467	-0.431658	-0.224857	0.257093	0.321578	-0.274054	0.312189	0.252848	-0.238772	0.334015	-0.232006	-0.201067	-0.162721	0.284639	-0.331384	0.249177	-0.385554	-0.222611	0.311219	-0.16846	0.1737	-0.343064
PopB_olfactory_bulb	0.239495	0.245096	-0.2577	0.318604	-0.44114	-0.367057	-0.195752	0.240955	0.234598	-0.453679	0.317016	0.235497	-0.265876	-0.290901	-0.206351	-0.232604	-0.251555	0.300134	-0.253888	-0.189959	-0.411157	0.307083	0.208673	-0.290169	-0.412612	0.359418	-0.14179	0.389531	-0.497219	-0.25624	0.228543	0.283385	-0.324177	0.229594	0.298327	-0.249157	0.34912	-0.218335	0.190608	-0.222424	0.326533	-0.402161	0.194228	-0.4261	-0.256005	0.256976	0.174422	0.201019	-0.431512
PopC_brainstem	0.353596	0.261564	-0.210223	0.474933	-0.319735	-0.217974	0.285266	0.251739	0.367492	-0.290123	0.319796	0.203993	-0.288915	-0.254191	0.332096	0.265554	-0.210242	0.342934	-0.294944	-0.334551	-0.267252	0.327837	0.171026	-0.273274	-0.30101	-0.160386	-0.265757	0.239433	-0.374242	-0.204476	0.449707	0.208079	-0.190174	0.161608	-0.213828	0.161153	0.220326	-0.338219	0.207772	0.227155	0.256119	-0.305131	-0.209348	-0.338332	-0.235845	0.373052	0.299553	0.274078	-0.241137
PopC_cortex	0.407788	0.277675	-0.25209	0.505467	-0.322513	0.180149	0.318599	0.219955	0.319103	-0.364396	0.335971	0.190617	-0.298472	-0.274636	0.32464	0.262479	-0.177786	0.350497	-0.342481	-0.285856	-0.252969	0.373048	0.239578	-0.179523	-0.308987	0.204586	-0.269611	0.234227	-0.369543	-0.238305	0.418191	-0.189559	-0.182156	-0.231679	-0.201355	0.212064	0.248655	-0.280496	0.267084	-0.173319	0.274013	-0.367335	-0.268877	-0.38101	-0.250665	0.254073	0.273667	0.144847	-0.326817
PopC_olfactory_bulb	0.46761	0.307407	-0.328996	0.488946	-0.279868	0.288777	0.456219	0.27633	0.427044	-0.302473	0.296366	-0.225734	-0.245313	-0.299841	0.383997	0.312345	0.267324	0.24896	-0.289609	-0.145744	0.199673	0.424371	0.241151	0.229521	-0.261153	-0.142511	-0.223872	-0.188064	-0.363366	-0.293886	0.39841	-0.265009	-0.157815	-0.302121	0.214063	0.231512	0.239899	0.204256	0.410422	0.229104	0.201238	-0.399611	-0.309161	-0.331423	-0.231286	0.189954	0.334916	0.188728	-0.354657
PopD_brainstem	-0.239276	-0.214086	-0.234859	0.224513	-0.193171	-0.231186	-0.194794	-0.21795	-0.36903	0.205112	-0.230295	0.215636	-0.352104	-0.254237	0.344865	0.210086	-0.23367	0.335328	0.252849	-0.186278	0.252561	0.218655	-0.171313	-0.208291	0.23486	-0.204503	-0.171783	-0.233483	0.208638	0.253232	0.234328	-0.226524	0.220816	-0.223042	-0.366474	0.329426	-0.216598	-0.251297	0.172066	-0.236074	-0.185798	0.215594	0.234081	-0.259489	-0.173105	0.16352	0.176766	0.179987	0.173029
PopD_cortex	-0.770332	-0.489287	-0.482407	-0.420888	-0.393553	0.332109	0.39808	-0.268943	0.773655	-0.319027	0.328829	-0.591861	-0.399674	0.404865	-0.462032	0.437302	-0.351777	-0.551072	0.435501	0.326486	0.311387	0.590628	-0.400449	0.349098	-0.327002	-0.261389	-0.444965	-0.4332	-0.757803	0.317074	0.232428	0.42432	-0.368953	0.219189	0.733413	0.380752	0.458446	-0.579833	-0.506763	-0.401991	-0.386147	0.353207	0.325125	-0.408573	0.545724	0.292305	-0.352705	-0.558913	-0.418457
PopD_olfactory_bulb	0.2942	-0.307262	-0.284079	0.273438	-0.243516	-0.220097	0.405584	-0.313993	0.355257	-0.353621	0.31209	-0.244969	-0.33287	0.289578	0.197286	-0.294419	-0.396231	0.189124	-0.210211	-0.277198	-0.279055	0.313078	-0.305869	-0.339592	-0.411943	-0.258152	-0.245985	-0.265109	-0.341455	0.238708	-0.239363	0.236214	-0.328467	-0.34234	0.48908	0.162291	0.459059	-0.179778	-0.247729	-0.295998	0.339599	-0.400579	0.221245	-0.445025	-0.387212	-0.285423	0.197082	-0.303278	-0.344427
PopE_cortex	0.256481	-0.201446	-0.174798	0.326032	-0.310836	-0.266598	0.397596	-0.217411	0.306039	-0.29384	0.220786	-0.203323	-0.271992	-0.248352	-0.262453	-0.241925	-0.28603	-0.156777	-0.271506	0.223784	-0.219363	0.299145	-0.206855	-0.22709	-0.323992	0.226344	-0.315159	-0.260067	-0.243223	0.37111	-0.285109	-0.208529	-0.259404	-0.212948	0.270157	-0.187372	0.278188	0.246299	-0.255312	-0.315897	-0.249468	-0.228879	0.243431	-0.389955	-0.327684	0.247119	-0.280632	-0.257008	-0.393332
PopE_olfactory_bulb	0.256681	0.174424	-0.223723	0.297576	-0.32924	-0.284167	0.34369	0.236231	0.259546	-0.319711	0.242558	0.217709	-0.261265	0.218931	-0.169391	-0.187601	-0.258064	-0.189046	-0.177624	-0.184639	-0.338342	0.316318	-0.265945	-0.267118	-0.378132	0.152688	-0.23559	0.191696	-0.345265	0.220089	0.207239	0.234372	-0.219436	-0.317591	0.368327	0.20676	0.34408	-0.177337	-0.282719	-0.24224	0.354235	-0.349001	0.206099	-0.321709	-0.284221	0.257452	0.23282	0.175129	-0.236028
AMYGDALA_UP_AS1	0.469669	0.384584	-0.739096	0.539182	-0.518721	-0.606252	0.510813	-0.58992	-0.450229	-0.563536	0.340177	-0.487306	0.265316	-0.587397	0.54073	-0.454582	0.408971	0.514962	-0.239832	0.581306	-0.301734	0.560842	-0.329297	0.347486	-0.365071	0.444521	0.337794	0.34315	-0.545522	-0.505389	-0.314768	-0.397372	-0.226973	-0.429643	0.264441	0.314248	0.221021	0.626132	0.3323	0.342437	-0.520804	-0.592286	-0.535445	-0.582564	-0.506208	0.514804	-0.48216	-0.271693	-0.754594
AMYGDALA_UP_AS2	0.562427	0.36485	-0.588871	0.470985	-0.594515	-0.466113	0.374161	-0.723421	0.456175	-0.658395	0.556582	-0.370973	0.442032	-0.592678	0.367414	-0.38596	0.647899	0.514418	-0.239832	0.504256	-0.376903	0.439579	-0.36992	0.251978	-0.521604	0.672161	0.349974	0.249263	-0.689888	-0.519333	0.36858	0.545841	0.263119	0.349706	-0.476389	0.204998	-0.283214	0.518864	0.230354	0.337299	0.311132	-0.574101	-0.640211	-0.720722	-0.371513	0.450498	-0.433225	-0.430396	-0.745164
AMYGDALA_UP_AS3	0.49324	0.517519	-0.5572	0.58929	-0.480532	-0.53951	0.445972	-0.604019	0.312404	-0.684346	0.562149	-0.296181	0.404672	-0.562573	0.322266	0.414903	0.525233	0.632951	-0.238762	0.467317	-0.615936	0.571854	-0.458992	0.349472	-0.64337	0.677254	-0.321899	0.524089	-0.626153	-0.622427	0.467935	0.541736	-0.444272	0.44633	-0.395173	0.205002	-0.315889	0.424637	0.384426	0.33502	0.377699	-0.5418	-0.717398	-0.554499	-0.322318	0.440779	0.337621	-0.279595	-0.575209
AMYGDALA_TOP50	0.474168	0.250273	-0.482703	0.486384	-0.402677	-0.241208	0.527106	-0.383452	0.604168	-0.446037	0.317345	-0.367707	0.223686	-0.374087	0.452384	0.212793	0.325392	0.486966	-0.234171	0.395506	-0.268003	0.547007	0.202806	0.4605	-0.161221	0.202665	0.269514	0.161096	-0.516816	-0.370355	0.400776	-0.312992	-0.154032	-0.491078	0.295309	0.247206	0.379394	0.345433	0.537341	0.326288	-0.310986	-0.542522	-0.528992	-0.522206	-0.421489	0.251346	0.355355	-0.205681	-0.447422
HEMISECTION_1WEEK_UP	-0.241157	0.424912	-0.458824	0.330617	-0.412865	-0.405665	-0.204761	0.23494	-0.416871	-0.439054	0.368289	-0.1645	0.332792	0.196341	0.150869	-0.257781	-0.374059	0.264695	-0.181934	0.240883	-0.455134	0.224065	0.168658	-0.428189	-0.396903	0.252523	-0.393496	0.362468	-0.425468	0.222561	-0.182204	0.386292	-0.46408	0.384001	-0.210684	0.248699	0.336984	0.173602	-0.273489	-0.266936	0.448828	-0.291729	0.277481	-0.416543	-0.305887	0.253714	0.19502	0.245277	0.181176
HEMISECTION_2WEEK_UP	-0.233543	0.327765	-0.398998	0.245308	-0.409961	-0.406924	-0.153586	0.297056	-0.353957	-0.403963	0.298603	0.202138	-0.189196	0.160458	-0.138385	-0.311326	-0.357377	0.31458	-0.286599	-0.187838	-0.515622	0.182665	0.20338	-0.362726	-0.438173	0.317759	-0.288216	0.431193	-0.513368	-0.174685	-0.203823	0.255198	-0.400278	0.282455	0.22969	0.248531	0.406064	0.157197	0.173078	-0.186553	0.322337	-0.393058	0.227368	-0.461834	-0.325125	0.269729	0.215297	0.161432	-0.210222
TRANSECTION_1WEEK_UP	-0.180666	0.481773	-0.421648	0.376785	-0.470525	-0.416122	-0.153618	0.207134	0.311482	-0.486985	0.425404	0.291874	-0.235858	-0.221604	-0.292231	-0.18856	-0.330757	0.322515	-0.370214	0.199811	-0.525163	0.290255	0.188178	-0.374834	-0.502093	0.385418	-0.328091	0.488226	-0.598073	-0.251155	0.221372	0.484629	-0.365471	0.345758	0.42835	0.119848	0.398478	0.183658	-0.166958	-0.280378	0.518433	-0.482299	0.187542	-0.446663	0.208949	0.230338	-0.145392	0.20544	-0.304967
TRANSECTION_2WEEK_UP	0.230337	0.253545	-0.471789	0.390275	-0.358345	-0.380141	-0.195192	0.236399	-0.399304	-0.353294	0.284257	0.20489	-0.198737	-0.239083	-0.158356	-0.213406	-0.340119	0.387769	-0.316287	-0.20755	-0.458474	0.306786	0.243103	-0.30116	-0.440689	0.305096	-0.324436	0.370644	-0.449954	-0.322631	0.223116	-0.245791	-0.408639	0.248802	-0.184033	0.26899	0.30258	-0.153783	0.183015	0.154695	0.272049	-0.393096	0.184556	-0.402573	-0.31632	0.242498	0.294747	-0.234248	-0.247926
STRIATUM_TOP50	0.610258	0.353659	-0.485981	0.619688	-0.473928	-0.314777	0.616707	-0.455404	0.765472	-0.585972	0.406699	-0.391007	0.180627	-0.400921	0.517672	0.341607	0.253664	0.422132	-0.235258	0.415384	-0.332495	0.626165	-0.261429	0.339475	-0.343594	-0.280977	0.14854	0.129478	-0.586503	-0.401317	0.343915	-0.297083	-0.234383	-0.449867	0.40352	0.381702	0.477274	0.440658	0.472844	0.434654	-0.27345	-0.620713	-0.533395	-0.558364	-0.554727	0.304125	0.342182	-0.160647	-0.491078
HIPPOCAMPUS_ASTRO1	0.782737	0.555061	-0.67427	0.630028	-0.685559	-0.818346	0.712843	-0.487628	0.567107	-0.820502	0.670832	-0.641402	-0.450052	-0.606129	0.45755	0.828834	-0.359436	0.25339	-0.33495	0.618382	-0.836949	0.78061	-0.743868	0.380513	-0.676875	0.311793	-0.529489	0.326651	-0.657988	-0.648294	-0.425315	-0.357476	-0.659508	0.319683	0.615169	0.556288	0.667338	0.467329	0.340945	0.499959	-0.396806	-0.861272	-0.731769	-0.678962	-0.632004	-0.318664	0.441742	-0.424313	-0.647661
HIPPOCAMPUS_ASTRO2	0.474781	-0.326246	-0.680383	0.862429	-0.805063	-0.690909	0.847635	-0.663046	0.750997	-0.720679	0.529189	-0.683812	-0.332373	-0.314835	0.744915	-0.611616	0.356275	-0.303354	-0.685979	0.270882	-0.596543	0.692411	-0.298993	0.762863	-0.415851	-0.376247	0.36632	-0.290638	-0.508003	-0.640559	0.471039	-0.444237	-0.54635	-0.342459	0.548884	0.51525	0.428566	0.357553	0.596249	0.471467	0.379652	-0.758066	-0.845808	-0.678951	-0.807689	-0.495281	0.519528	-0.405159	-0.77995
HIPPOCAMPUS_TOP240	0.433081	0.205323	-0.348198	0.442346	-0.360049	0.206548	0.441651	0.211146	0.468286	-0.335894	0.263395	-0.258722	-0.219935	-0.345182	0.377023	0.240726	0.24051	0.320205	-0.28149	0.174363	-0.186068	0.422928	0.205798	0.217335	-0.199426	0.197512	0.221147	-0.158234	-0.356675	-0.34604	0.337073	-0.299998	-0.178001	-0.334879	0.222339	0.190872	0.234019	0.251136	0.345698	0.187397	0.175338	-0.388049	-0.427136	-0.362483	-0.284154	0.171937	0.312813	-0.183919	-0.398752
CORTEX_DEVELOPMENT_A1	-0.33392	0.366994	-0.382592	0.361635	0.52293	0.362447	-0.251663	0.587742	-0.454043	0.586923	-0.314032	-0.381809	-0.43495	-0.273886	0.663472	0.411131	0.385988	0.320743	-0.238622	0.300146	0.6194	0.303684	0.205591	-0.291781	0.454861	-0.463088	0.387637	-0.255418	0.403616	0.334652	-0.241382	-0.403907	0.385805	-0.432301	-0.537198	-0.221328	0.286856	0.294684	0.558294	0.284946	-0.35264	0.226071	-0.280985	0.442168	0.481865	0.182234	0.496269	-0.295844	0.485086
CORTEX_DEVELOPMENT_A2	0.343004	0.630711	-0.681272	0.396219	0.441929	-0.401273	-0.725781	0.657349	-0.579995	0.330545	-0.362581	-0.744672	0.317699	-0.548894	0.750445	0.518818	-0.366725	0.329582	-0.329463	0.521608	0.624234	-0.314474	0.385964	-0.510805	0.450174	-0.505642	-0.394722	0.531665	0.451579	-0.554612	0.348363	-0.684408	-0.788096	-0.435454	-0.729109	0.882066	-0.26086	-0.323605	0.489306	0.422155	0.33191	-0.616598	-0.566722	-0.403861	0.592308	0.38383	0.46799	-0.52373	0.368694
CORTEX_DEVELOPMENT_A3	0.410715	0.612106	-0.622962	0.531207	-0.242418	-0.476015	-0.260945	-0.561409	0.387711	-0.325944	0.267206	-0.521217	-0.437496	-0.316598	0.680959	0.36991	-0.235615	-0.233477	-0.288219	0.673774	0.301137	0.561632	-0.281041	0.347414	0.263053	-0.45988	-0.369913	0.325693	-0.260923	-0.398584	-0.290398	-0.684443	-0.514861	-0.505239	-0.346119	0.620793	0.30593	0.563743	0.534751	0.329397	-0.432105	-0.578077	-0.446745	-0.494409	-0.289985	-0.248123	0.376224	-0.409882	-0.350736
CORTEX_INJURY_MCAO_B1	0.49833	0.590683	-0.708964	0.537209	-0.313324	-0.469409	-0.305176	-0.516185	0.464453	0.317309	0.313324	-0.621307	-0.272204	-0.467137	0.666379	0.445689	0.300097	-0.290886	-0.312298	0.700268	0.34191	0.543041	-0.29498	0.372818	0.30963	-0.462717	-0.44666	-0.338818	-0.347604	-0.323468	-0.337833	-0.684431	-0.442338	-0.399019	-0.367259	0.531914	0.30952	0.5756	0.565259	0.518197	-0.475193	-0.591547	-0.456233	-0.488984	0.383147	-0.279437	0.391777	-0.464153	-0.383443
CORTEX_INJURY_MCAO_B2	-0.231562	0.479342	-0.409792	0.398071	0.295797	-0.32374	0.245084	0.405033	-0.433361	0.377609	0.194677	-0.349914	-0.408351	-0.253436	0.644208	0.36072	-0.223501	0.25687	-0.211218	0.376031	0.396006	0.349286	-0.201723	0.266242	0.364902	-0.371689	0.334085	0.283979	0.229983	-0.258992	0.178379	-0.410757	0.225943	-0.429485	-0.419445	0.373337	0.23772	0.340072	0.542238	0.231012	-0.396703	-0.345143	-0.302733	0.295959	0.257873	-0.175891	0.452363	-0.350612	0.300129
CORTEX_INJURY_MCAO_B3	-0.238822	0.330602	-0.357458	0.308589	0.240284	-0.373329	0.234434	0.278237	-0.435882	-0.227868	-0.259632	-0.300351	-0.318768	-0.142066	0.614254	0.461006	-0.312303	0.228069	0.20279	0.453812	0.347675	0.420513	-0.350655	-0.30818	0.275936	-0.428756	-0.279035	-0.225658	0.321778	-0.269666	-0.207068	-0.446737	-0.29829	-0.447239	-0.358368	0.498172	0.343707	0.360672	0.359841	0.236779	-0.415993	-0.457944	0.252716	-0.255521	-0.271061	-0.222926	0.371938	-0.419899	0.308479
CONTUSION_SCI_RA	0.429279	0.380539	0.259248	0.37126	-0.519535	-0.488507	0.51098	0.349697	-0.395842	-0.422983	0.604325	-0.196423	0.376018	-0.324081	0.3125	0.54238	-0.211738	0.318147	-0.325344	-0.329109	-0.640247	0.470562	-0.315148	-0.303113	-0.593742	0.53732	-0.47481	-0.411136	-0.597189	0.416952	0.396117	0.482079	-0.491067	0.477596	0.447147	-0.392397	0.700908	0.483258	0.321954	0.290089	0.54246	-0.294406	0.4408	-0.473921	-0.29818	0.501675	-0.276795	0.365165	-0.478295
CONTUSION_SCI_SA	-0.406724	0.286143	0.288214	0.454664	-0.324285	0.303488	0.471592	0.61777	0.409002	0.608223	-0.383718	-0.33994	-0.37665	-0.308624	0.641609	-0.334805	0.51123	0.362132	-0.550643	0.267616	0.360942	-0.305311	-0.251877	0.456004	0.567684	-0.44112	0.294843	-0.500396	0.265027	0.44765	0.364899	-0.372052	0.460531	-0.296859	-0.407874	-0.184752	0.45878	0.32889	0.59836	0.325741	-0.357176	-0.367075	0.396336	-0.430729	0.360689	-0.414105	0.401635	0.329902	0.418845
[truncated: 111 more columns]

## Sheet: LGG.correlation.matrix
	G2	G3	astrocytoma	oligoastrocytoma	oligodendroglioma	IDHmut.codel	IDHmut.non.codel	IDHwt	TERT.promoter.status	TP53_mut	EGFR_mut	PTEN_mut	ATRX_mut	IDH1_mut	IDH2_mut	CIC_mut	NOTCH1_mut	FUBP1_mut	PIK3CA_mut	NF1_mut	PIK3R1_mut	SMARCA4_mut	ARID1A_mut	TCF12_mut	ZBTB20_mut	PTPN11_mut	PLCG1_mut	ZCCHC12_mut	PTEN_del	NF1_del	CDKN2C_del	CDKN2A_del	PIK3CA_amp	PIK3C2B_amp	PDGFRA_amp	MDM4_amp	MDM2_amp	EGFR_amp	CDK4_amp
PopA	0	-1.54067	0	0	0	0	0	-1.80391	0	0	0	0	0	0	0	-1.85535	0	0	0	0	0	0	0	0	0	0	0	0	0	0	0	0	0	0	0	0	0	0	0
PopB	0	0	0	0	-3.03541	-8.28466	6.2573	8.0182	-2.24674	1.90951	0	0	0	0	0	2.91624	0	-1.33932	-1.54973	0	0	0	0	-2.33908	0	0	0	0	0	0	0	0	0	0	0	0	0	0	0
PopC	0	-1.32408	0	0	0	-2.32328	0	0	0	0	1.52966	0	0	0	0	0	0	0	0	0	0	0	0	-1.56839	0	0	0	0	0	0	0	0	0	0	0	0	0	0	0
PopD	2.67396	0	0	0	1.75359	5.67541	-2.29409	-5.9641	0	0	0	0	0	0	0	-3.82729	0	0	0	0	0	0	0	0	0	0	0	0	0	0	0	0	0	0	0	0	0	0	0
PopE	4.23402	0	0	0	1.75038	7.92147	-2.13831	-6.62861	0	0	0	0	0	0	0	-3.60406	0	0	0	0	0	0	0	0	0	0	0	0	0	0	0	0	0	0	0	0	0	0	0
Brainstem	-1.57751	0	-1.84285	0	0	-1.55196	0	0	0	-2.17312	0	1.41427	0	1.41427	0	0	0	0	0	0	0	0	0	-1.36467	0	0	0	0	0	0	0	0	0	0	0	0	0	0	0
Cortex	0	0	0	0	0	0	0	0	0	0	0	0	0	0	0	0	0	0	0	0	0	0	0	0	0	0	0	0	0	0	0	0	0	0	0	0	0	0	0
Olfactory_bulb	-1.63395	0	0	0	0	-2.94258	0	3.17965	0	0	0	0	0	0	0	2.05643	0	-1.40779	0	0	0	0	0	0	0	0	0	0	0	0	0	0	0	0	0	0	0	0	0
PopA_brainstem	0	0	3.0804	0	-4.8147	-5.72845	6.63579	7.39922	-4.80882	2.45889	0	0	0	0	0	0	0	-2.87641	-1.86827	0	0	0	0	0	0	0	0	0	0	0	0	0	0	0	0	0	0	0	0
PopA_cortex	1.51083	0	0	0	2.12499	5.14526	-2.67372	-7.73623	0	0	0	0	0	0	0	-5.33952	0	0	1.32705	0	0	1.84951	0	0	0	0	0	0	0	0	0	0	0	0	0	0	0	0	0
PopA_olfactory_bulb	0	0	0	0	-2.55325	-8.00462	4.83452	7.86436	-1.99434	1.60698	2.03551	0	0	0	0	2.9064	0	-2.21662	-1.35783	0	0	0	0	-1.93447	0	0	0	0	0	0	0	0	0	0	0	0	0	0	0
PopB_brainstem	-3.88555	0	0	0	-4.76709	-10.76	5.25428	8.6279	-1.36393	0	0	0	0	0	0	3.78209	0	-1.48438	-1.59629	0	0	-1.3892	0	-2.54017	0	0	0	0	0	0	0	0	0	0	0	0	0	0	0
PopB_cortex	-2.35781	0	0	0	-2.91997	-8.10559	4.08943	8.15023	0	0	0	0	0	0	0	4.8151	0	0	-1.7471	0	0	0	0	-2.20479	0	0	0	0	0	0	0	0	0	0	0	0	0	0	0
PopB_olfactory_bulb	-1.45572	0	0	0	-2.85909	-6.6111	3.43979	7.10916	0	0	0	0	0	0	0	4.11607	0	0	-1.4015	0	0	-1.34497	0	-2.19012	0	0	0	0	0	0	0	0	0	0	0	0	0	0	0
PopC_brainstem	0	0	0	0	0	-1.77082	0	2.37906	0	0	0	0	0	0	0	1.97475	0	0	0	0	0	0	0	0	0	0	0	0	0	0	0	0	0	0	0	0	0	0	0
PopC_cortex	0	0	0	0	0	-1.66814	0	0	0	0	1.32921	0	0	0	0	0	0	0	0	0	0	0	0	0	0	0	0	0	0	0	0	0	0	0	0	0	0	0	0
PopC_olfactory_bulb	1.3174	-1.36342	0	0	0	0	0	0	0	-1.34841	0	0	0	0	0	0	0	0	0	0	1.3803	0	0	0	0	0	0	0	0	0	0	0	0	0	0	0	0	0	0
PopD_brainstem	0	0	-4.08531	0	2.90136	0	-3.06536	-3.49143	1.3529	-2.80451	0	0	0	0	1.39431	-2.42673	0	0	0	0	0	0	0	0	0	0	0	0	0	0	0	0	0	0	0	0	0	0	0
PopD_cortex	-3.79621	3.1909	0	0	-2.24995	-3.11961	0	6.75302	0	0	0	0	0	0	0	2.80886	0	0	0	2.40816	0	0	-1.69279	0	0	0	0	0	0	0	0	0	0	0	0	0	0	0	0
PopD_olfactory_bulb	-3.42133	2.12493	1.47375	-1.4418	-5.22486	-8.58779	2.76098	14.5609	0	0	0	2.41842	0	2.41842	0	5.83549	1.51254	0	0	0	0	0	0	0	0	0	1.71485	0	0	0	0	0	0	0	0	0	0	0	0
PopE_cortex	-1.75956	0	0	0	-1.97461	-9.44042	4.89172	6.92853	-1.67859	0	1.69999	0	0	0	0	0	0	-1.32094	0	0	0	0	0	0	0	0	1.50333	0	0	0	0	0	0	0	0	0	0	0	0
PopE_olfactory_bulb	-2.06544	1.35267	0	0	-3.76735	-8.83393	4.3303	13.7272	0	0	0	2.76954	0	2.76954	0	6.04887	0	0	0	0	0	0	0	-1.68189	0	0	1.48633	0	0	0	0	0	0	0	0	0	0	0	0
AMYGDALA_UP_AS1	0	-4.43271	0	1.595	0	-2.68121	2.00415	0	0	0	0	0	0	0	0	0	0	-1.47792	0	0	0	0	0	0	0	1.45678	0	0	0	0	0	0	0	0	0	0	0	0	0
AMYGDALA_UP_AS2	0	-2.54469	0	2.12254	-2.13916	-3.05898	4.4918	0	-2.94197	2.74703	0	0	0	0	0	0	0	-1.51688	-1.44584	0	0	0	0	-2.19012	0	0	0	0	0	0	0	0	0	0	0	0	0	0	0
AMYGDALA_UP_AS3	0	-2.61774	0	2.70119	0	-1.93507	3.15074	0	-1.95448	2.12267	0	0	0	0	0	0	0	0	-1.4331	0	0	0	0	-1.64362	0	0	0	0	0	0	0	0	0	0	0	0	0	0	0
AMYGDALA_TOP50	0	-2.50106	0	0	0	0	0	0	0	-1.85373	0	0	0	0	0	0	0	0	0	0	0	0	0	0	0	1.47057	0	0	0	0	0	0	0	0	0	0	0	0	0
HEMISECTION_1WEEK_UP	0	0	0	0	-2.6453	-4.17985	4.32164	4.46757	-1.51143	2.35203	0	0	0	0	0	3.39838	0	-1.49085	-1.69838	0	0	-1.46141	0	-1.7206	0	0	0	0	0	0	0	0	0	0	0	0	0	0	0
HEMISECTION_2WEEK_UP	0	0	0	0	-3.75322	-4.92132	4.41087	5.73705	0	1.64689	0	0	0	0	0	3.98767	0	0	-1.38895	0	0	0	0	-1.87983	0	0	0	0	0	0	0	0	0	0	0	0	0	0	0
TRANSECTION_1WEEK_UP	0	0	0	0	-3.93029	-4.6439	3.67837	6.9569	0	0	0	0	0	0	0	4.44013	0	0	0	0	0	-1.77832	0	-2.10312	0	0	0	0	0	0	0	0	0	0	0	0	0	0	0
TRANSECTION_2WEEK_UP	0	0	0	0	-1.35247	-3.09917	2.31463	2.05791	0	0	0	0	0	0	0	0	0	0	-1.36403	0	0	0	0	-1.61835	0	0	0	0	0	0	0	0	0	0	0	0	0	0	0
STRIATUM_TOP50	0	-1.67086	0	0	0	0	0	0	0	0	0	0	0	0	0	0	0	0	0	0	0	0	0	0	0	1.4294	1.38628	0	0	0	0	0	0	0	0	0	0	0	0
HIPPOCAMPUS_ASTRO1	0	0	0	0	-2.40172	-3.31206	1.45607	4.58858	0	0	0	1.43508	0	1.43508	0	3.30312	0	0	0	0	0	-1.7884	0	-1.35311	0	0	0	0	0	0	0	0	0	0	0	0	0	0	0
HIPPOCAMPUS_ASTRO2	0	0	0	0	0	0	0	1.57538	0	-1.55583	0	0	0	0	0	0	0	0	0	0	0	0	0	0	0	1.69986	0	0	0	0	0	0	0	0	0	0	0	0	0
HIPPOCAMPUS_TOP240	0	-2.16175	0	0	0	0	0	0	0	-1.79039	0	0	0	0	0	0	0	0	0	0	0	0	0	0	0	0	0	0	0	0	0	0	0	0	0	0	0	0	0
CORTEX_DEVELOPMENT_A1	2.04016	-1.47	-1.99512	1.35696	5.3758	10.1609	-8.9984	-8.75454	5.48873	-5.29164	0	0	0	0	0	-1.98284	0	0	0	0	0	0	0	0	0	0	0	0	0	0	0	0	0	0	0	0	0	0	0
CORTEX_DEVELOPMENT_A2	0	-2.39634	-2.92262	1.96544	3.54718	3.23577	-3.03148	-6.90826	0	0	0	0	0	0	0	-2.1146	0	0	0	0	0	0	0	0	0	0	0	0	0	0	0	0	0	0	0	0	0	0	0
CORTEX_DEVELOPMENT_A3	0	-2.00587	0	0	0	0	0	0	0	-1.84522	0	0	0	0	0	0	0	0	0	0	0	0	0	0	0	0	0	0	0	0	0	0	0	0	0	0	0	0	0
CORTEX_INJURY_MCAO_B1	0	-1.75016	0	0	0	0	0	0	0	-1.80297	0	0	0	0	0	0	0	0	0	0	0	0	0	0	0	0	0	0	0	0	0	0	0	0	0	0	0	0	0
CORTEX_INJURY_MCAO_B2	2.04072	-2.20103	-1.85671	0	3.98709	7.60089	-7.72647	-6.47174	4.117	-4.77356	0	0	0	0	0	-1.80091	0	0	0	0	0	0	0	0	0	0	0	0	0	0	0	0	0	0	0	0	0	0	0
CORTEX_INJURY_MCAO_B3	0	0	0	0	0	2.24348	-2.7643	-1.63979	2.19972	-2.66963	0	0	0	0	0	0	0	0	0	0	0	0	0	0	0	0	0	0	0	0	0	0	0	0	0	0	0	0	0
CONTUSION_SCI_RA	0	0	2.14265	0	-4.79679	-7.71126	7.04036	12.5924	-1.4921	2.46873	0	1.9674	0	1.9674	0	6.06324	0	-1.8828	-2.15388	0	0	0	0	-1.75975	0	0	1.41925	0	0	0	0	0	0	0	0	0	0	0	0
CONTUSION_SCI_SA	0	0	0	0	0	3.68822	-2.62977	0	3.97641	-2.92668	0	0	0	0	0	0	1.58633	0	0	0	0	0	0	0	0	0	0	0	0	0	0	0	0	0	0	0	0	0	0
