# Supplementary material for: Brain Region-Specific Gene Signatures Revealed by Distinct Astrocyte Subpopulations Unveil Links to Glioma and Neurodegenerative Diseases
Source: eNeuro. 2019 Apr 2;6(2):ENEURO.0288-18.2019. doi: 10.1523/ENEURO.0288-18.2019 (PMC6449165; doi:10.1523/ENEURO.0288-18.2019)
Supplement: Figure 6-3 — Significantly enriched gene sets related to neurodegenerative diseases (AD, HD, and PD). Gene set enrichment was obtained with differentially expressed genes specific for each regional astrocyte subpopulation. Download Figure 6-3, XLSX file. [file sup_enu-eN-NWR-0288-18-s16.xlsx]

## Sheet: ReadME
This file contains the enriched gene sets related to neurodegeneratve diseases (AD, HD, PD, MS).
Regional astrocyte gene profiles were used to evaluate the enrichment of gene sets. The collection of gene sets evaluated consisted on the MsigDB collection and gene sets
obtained from literature.
Gene set enrichment was obtained using a hypergeometric function. Gene sets were enriched with an FDR < 0.05 with at least 5 genes
The table depicted in this files includes:
	gene set name
	number of genes in the gene set
	astrocyte subpopulations and regions where the gene set was enriched
	if the genes were upregulated or downregulated with respect to all other astrocyte subpopulations and regions
	number of genes from the astrocyte gene signature with which the gene set was enriched
	p-value and FDR
	genes overlapped with the enriched gene set; only the genes with the highest expression fold-change (with respect to the Neegative sample) are listed

## Sheet: enriched gene sets
Neurological Disease Gene Sets	Num. genes in set	Region	Subpopulation(s)	Up/Down	Num	Pval	FDR	Top 10 genes with higher Fold-change vs Negative sample
BLALOCK_ALZHEIMERS_DISEASE_DN	1237	Cortex	BC	Down	69	6.82783e-22	1.23058e-17	Rapgef4,Tubg2,Cnksr2,Dlg2,Shank2,Rims2,Snca,Kif5c,Apc,Bzrap1
			B	Down	52	2.26349e-13	4.07948e-09	Ina,Crmp1,Diras2,Gnal,Smyd2,Slc12a5,Pcp4,Slit2,Pde2a,Rnf11
			C	Up	38	1.41499e-08	0.00025457	Pmpcb,Crym,Laptm4b,Prmt1,Etfa,Sec23b,Ndufb5,Pex7,Aldh2,Atp5g3
		Olfactory bulb	ABCD	Down	9	2.68412e-07	0.00483115	Bcl11b,Nefl,Rapgef4,Gad2,Cnksr2,Dlg2,Camk2a,Psd3,Calm1
			ABC	Down	15	5.8778e-07	0.0105883	Rit2,Actn1,Mrps15,Ddn,Stxbp1,Kif5c,Gap43,Shank2,Arhgef3,Prkcb
			BC	Down	23	3.66732e-08	0.000658835	Ina,Syt1,Hpcal4,Sv2a,Kcnq2,Penk,Gad1,Ndrg4,Kcnj3,Bsn
			B	Down	46	1.22163e-17	2.20248e-13	Pcp4,Lzts1,Pak3,Crmp1,Ctnna2,Bcl11a,Rab3a,Prkar1b,Cacng3,Slc1a1
			C	Up	46	3.9288e-13	7.08284e-09	Cldn10,Chrdl1,Vamp1,Apba2,Hrsp12,Atic,Lxn,Arhgef4,Ptdss1,Elovl2
BLALOCK_ALZHEIMERS_DISEASE_UP	1691	Cortex	B	Up	97	7.99945e-12	1.43918e-07	Cebpa,Man1b1,Adcy7,Cldn5,Pdgfb,Irf3,Haus7,Dgcr14,Slc11a1,Islr
			BC	Up	64	4.38235e-08	0.000786105	Tom1,Stom,Psmc3ip,Plscr3,Naga,Cdipt,Fbln1,Nme3,Slc12a9,Shc1
BLALOCK_ALZHEIMERS_DISEASE_INCIPIENT_DN	165	Cortex	BC	Down	17	6.71356e-11	1.20616e-06	Tubg2,Rims2,Kif5c,Apc,Bzrap1,Dlgap2,Tro,Ppp3r1,Ddn,Pak3
		Olfactory bulb	C	Up	10	3.17966e-06	0.0570781	Cldn10,Vamp1,Atic,Arhgef4,Rgs20,Pdhx,Glul,Mgll,Fhl1,Kidins220
HOKAMA_ALZHEIMERS_DN	181	Cortex	BC	Down	13	6.19934e-07	0.0110348	Satb1,Stmn2,Rnf165,Myo5a,Atp2b2,Prkcb,Rimbp2,Enc1,Snap25,Gng3
			B	Down	23	4.79084e-17	8.6374e-13	Ina,Slc17a7,Smyd2,Homer1,Neto1,Syt13,Gabra1,Wipf3,Pde2a,Gfra2
		Olfactory bulb	BC	Down	9	4.2658e-08	0.00076618	Gabra5,Ina,Rnf165,Ppp1r16b,Cplx1,Syn1,Ano3,Snap25,Atp1a3
HOKAMA_ALZHEIMERS_UP	38	Olfactory bulb	ABD	Up	2	1.45427e-06	0.0261972	Sntb1,Slc7a11
LABADORF_HUNTINGTONS_DN	1258	Olfactory bulb	BC	Down	18	5.12227e-11	9.21803e-07	Prokr2,Rnf165,Fam163b,Sv2c,Kcnq2,Mbp,Scrt1,Rasgrp1,Shank1,Cplx1
LABADORF_HUNTINGTONS_UP	1857	Cortex	B	Up	89	2.43733e-14	4.39061e-10	Gja4,Neurl3,Alpk1,C4b,Ltbr,Gli1,Cd300a,Hyal2,Tbxas1,Slc11a1
		Olfactory bulb	B	Up	58	3.58975e-18	6.47161e-14	Cxcl16,Dnase1l3,Tsku,Ptafr,Lyve1,C5ar1,Ephb4,Hmox1,Rgl3,Snx20
			BC	Up	18	1.203e-07	0.00216817	Ranbp3l,Klhdc7a,Arhgef19,Cd302,Sspn,Efemp1,Gli2,Dhrs3,Olfml1,Gjb6
KEGG_HUNTINGTONS_DISEASE	185	Cortex	C	Up	13	1.64667e-08	0.000296236	UQCR10,ATP5O,ATP5G3,ATP5G1,COX5A,ATP5A1,SDHA,ATP5B,NDUFB5,SLC25A5,AP2M1,HDAC1,SLC25A4
KEGG_PARKINSONS_DISEASE	133	Cortex	C	Up	11	1.05003e-08	0.000188942	Ndufb5,Atp5g3,Atp5g1,Slc25a5,Atp5o,Cox5a,Atp5a1,Slc25a4,Uqcr10,Atp5b
HAN_MULTIPLE_SCLEROSIS_DN	727	Cortex	BC	Down	32	1.8078e-10	3.24699e-06	Smarca1,Fbxw7,Kras,Eif5a2,Usp46,Uhmk1,Nudt4,Purb,Myo5a,Syt1
			B	Down	35	1.36404e-13	2.45854e-09	Elavl2,Cdr2,Usmg5,Ppp4r2,Pdk3,Ube2w,Erbb4,Sms,Cnot6,Suz12
